# Supplementary material for: Iridium and a Brønsted acid cooperatively catalyzed chemodivergent and stereoselective reactions of vinyl benzoxazinones with azlactones
Source: Royal Society of Chemistry journal article supplement (doi:10.1039/c8cc08962k), 2019-01-01
Supplement: c8cc08962k1.pdf [file c8cc08962k1.pdf]

## *Supporting Information*

# **Iridium and Brønsted Acid Cooperatively Catalyzed Chemodivergent and Stereoselective Reactions of Vinyl Benzoxazinones with Azlactones**

Meng Sun, Xiao Wan, Si-Jia Zhou, Guang-Jian Mei and Feng Shi\*

*School of Chemistry and Materials Science, Jiangsu Normal University, Xuzhou 221116, China*

*E-mail: [fshi@jsnu.edu.cn](mailto:fshi@jsnu.edu.cn)*

### **Contents:**

- 1. General information (S2)**
- 2. Condition optimization and investigation on the catalytic asymmetric version (S2-S5)**
- 3. Effect of the C4-substituent of azlactones on the chemoselectivity and the generality of the substitution reactions (S6)**
- 4. Procedure for the synthesis of products 3 and characterization data (S7-S22)**
- 5. Procedure for the synthesis of chiral 3 and characterization data (S23-S26)**
- 6. Procedure for the synthesis of product 5 and characterization data (S26-S32)**
- 7. Procedure for one-mmol scale synthesis of product 3aa (S33)**
- 8. NMR spectra of products 3, 5 and chiral 3 (S34-S74)**
- 9. HPLC spectra of chiral 3 (S75-S78)**
- 10. X-ray single crystal data for compounds 3aa and chiral 3aa (S79-S82)**

## 1. General information

$^1\text{H}$  and  $^{13}\text{C}$  NMR spectra were measured at 400 and 100 MHz, respectively. The solvent used for NMR spectroscopy was  $\text{CDCl}_3$ , using tetramethylsilane as the internal reference. HRMS (ESI) was determined by a HRMS/MS instrument. Enantiomeric ratios (*er*) were determined by chiral high-performance liquid chromatography (chiral HPLC). The chiral columns used for the determination of Enantiomeric ratios by chiral HPLC were Chiralpak columns. Optical rotation values were measured with instruments operating at  $\lambda = 589$  nm, corresponding to the sodium D line at the temperatures indicated. The X-ray source used for the single crystal X-ray diffraction analysis of compounds **3aa** and chiral **3aa** was a  $\text{MoK}\alpha$  ( $\lambda = 0.71073$ ), and the thermal ellipsoid was drawn at the 30% probability level. Analytical grade solvents for the column chromatography were distilled before use. All starting materials commercially available were used directly. Substrates **1** were synthesized according to the literature method.<sup>1</sup>

## 2. Screening of catalysts and condition optimization

Table S1. Condition optimization for [4+2] cycloaddition<sup>a</sup>

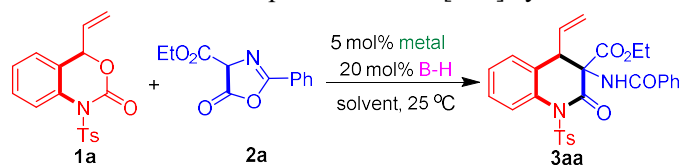

| entry | metal                                | B-H                                  | solvent                          | <b>1a:2a</b> | dr <sup>b</sup> | yield (%) <sup>c</sup> |
|-------|--------------------------------------|--------------------------------------|----------------------------------|--------------|-----------------|------------------------|
| 1     | $[\text{Ir}(\text{cod})\text{Cl}]_2$ | -                                    | toluene (0.1 M)                  | 1:1          | 64:36           | 84                     |
| 2     | $\text{Pd}(\text{PPh}_3)_4$          | -                                    | toluene (0.1 M)                  | 1:1          | >95:5           | 20                     |
| 3     | $[\text{Ir}(\text{cod})\text{Cl}]_2$ | -                                    | THF (0.1 M)                      | 1:1          | 72:28           | 85                     |
| 4     | $[\text{Ir}(\text{cod})\text{Cl}]_2$ | -                                    | acetone (0.1 M)                  | 1:1          | 75:25           | 92                     |
| 5     | $[\text{Ir}(\text{cod})\text{Cl}]_2$ | -                                    | EtOAc (0.1 M)                    | 1:1          | 72:28           | 89                     |
| 6     | $[\text{Ir}(\text{cod})\text{Cl}]_2$ | -                                    | $\text{CH}_2\text{Cl}_2$ (0.1 M) | 1:1          | 60:40           | 60                     |
| 7     | $[\text{Ir}(\text{cod})\text{Cl}]_2$ | -                                    | MeCN (0.1 M)                     | 1:1          | 75:25           | 82                     |
| 8     | $[\text{Ir}(\text{cod})\text{Cl}]_2$ | TFA                                  | acetone (0.1 M)                  | 1:1          | 91:9            | 72                     |
| 9     | $[\text{Ir}(\text{cod})\text{Cl}]_2$ | TfOH                                 | acetone (0.1 M)                  | 1:1          | 75:25           | 30                     |
| 10    | $[\text{Ir}(\text{cod})\text{Cl}]_2$ | AcOH                                 | acetone (0.1 M)                  | 1:1          | 72:28           | 80                     |
| 11    | $[\text{Ir}(\text{cod})\text{Cl}]_2$ | $\text{PhCO}_2\text{H}$              | acetone (0.1 M)                  | 1:1          | 80:20           | 75                     |
| 12    | $[\text{Ir}(\text{cod})\text{Cl}]_2$ | $\text{TsOH}\cdot\text{H}_2\text{O}$ | acetone (0.1 M)                  | 1:1          | 94:6            | 67                     |
| 13    | $[\text{Ir}(\text{cod})\text{Cl}]_2$ | $\text{TsOH}\cdot\text{H}_2\text{O}$ | acetone (0.05 M)                 | 1:1          | 94:6            | 67                     |
| 14    | $[\text{Ir}(\text{cod})\text{Cl}]_2$ | $\text{TsOH}\cdot\text{H}_2\text{O}$ | acetone (0.025 M)                | 1:1          | 94:6            | 80                     |
| 15    | $[\text{Ir}(\text{cod})\text{Cl}]_2$ | $\text{TsOH}\cdot\text{H}_2\text{O}$ | acetone (0.013 M)                | 1:1          | 94:6            | 70                     |

1. Mei, G.-J.; Bian, C.-Y.; Li, G.-H.; Xu, S.-L.; Zheng, W.-Q.; Shi, F. *Org. Lett.* **2017**, *19*, 3219.

|    |                          |                       |                   |       |      |    |
|----|--------------------------|-----------------------|-------------------|-------|------|----|
| 16 | [Ir(cod)Cl] <sub>2</sub> | TsOH·H <sub>2</sub> O | acetone (0.025 M) | 1:1.5 | 94:6 | 94 |
| 17 | [Ir(cod)Cl] <sub>2</sub> | TsOH·H <sub>2</sub> O | acetone (0.025 M) | 1:2   | 94:6 | 85 |
| 18 | [Ir(cod)Cl] <sub>2</sub> | TsOH·H <sub>2</sub> O | acetone (0.025 M) | 2:1   | 94:6 | 73 |

<sup>a</sup>The reaction was conducted at the 0.05 mmol scale in a solvent at 25 °C for 1.5 h. <sup>b</sup>The dr value was determined by <sup>1</sup>H NMR spectroscopy. <sup>c</sup>Isolated yield.

**Table S2.** Condition optimization for catalytic asymmetric [4+2] cycloaddition<sup>a</sup>

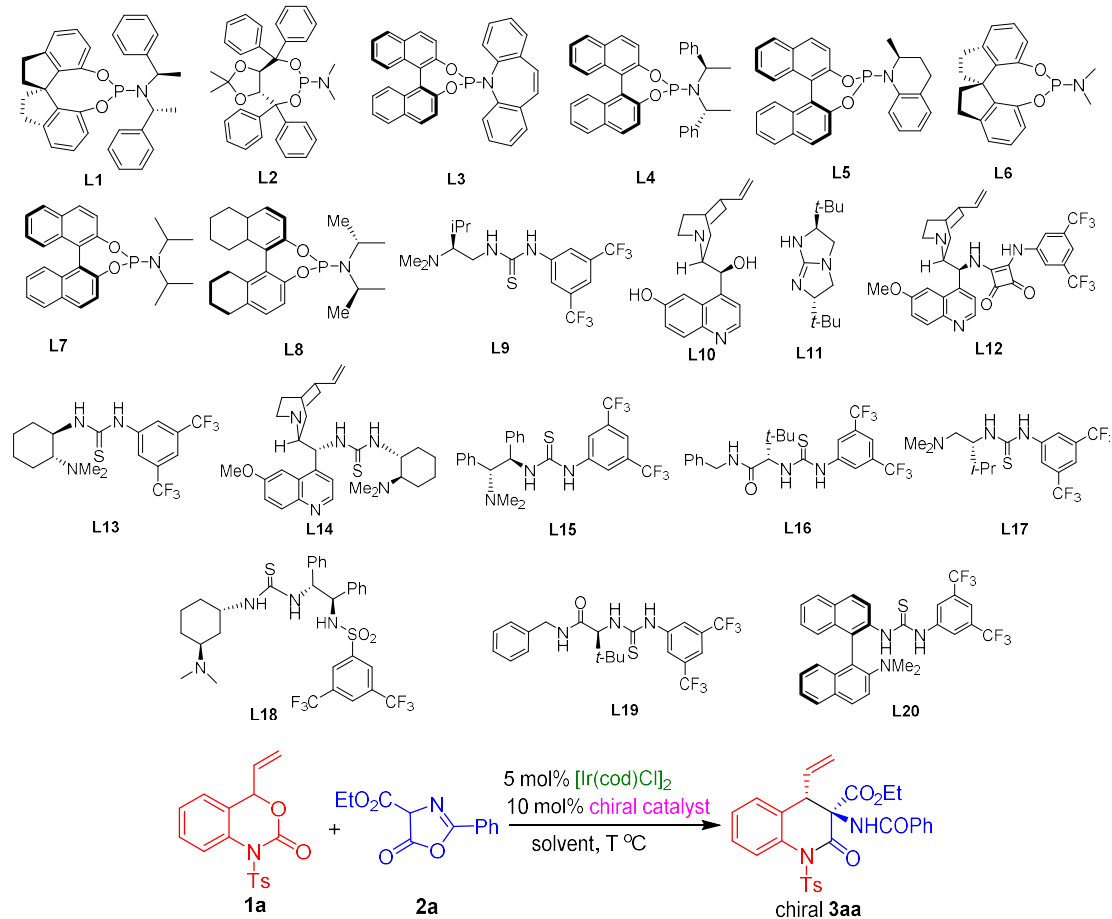

| entry | chiral catalyst | solvent       | T (°C) | <b>1a:2a</b> | yield (%) <sup>b</sup> | dr <sup>c</sup> | er <sup>d</sup> |
|-------|-----------------|---------------|--------|--------------|------------------------|-----------------|-----------------|
| 1     | <b>L1</b>       | PhMe (0.5 mL) | 25     | 1:1.5        | 78                     | 67:33           | 54:46           |
| 2     | <b>L2</b>       | PhMe (0.5 mL) | 25     | 1:1.5        | 83                     | 85:15           | 51:49           |
| 3     | <b>L3</b>       | PhMe (0.5 mL) | 25     | 1:1.5        | 74                     | 50:50           | 50:50           |
| 4     | <b>L4</b>       | PhMe (0.5 mL) | 25     | 1:1.5        | 89                     | 70:30           | 51:49           |
| 5     | <b>L5</b>       | PhMe (0.5 mL) | 25     | 1:1.5        | 86                     | 86:14           | 52:48           |
| 6     | <b>L6</b>       | PhMe (0.5 mL) | 25     | 1:1.5        | 75                     | 84:16           | 50:50           |
| 7     | <b>L7</b>       | PhMe (0.5 mL) | 25     | 1:1.5        | 87                     | 85:15           | 51:49           |
| 8     | <b>L8</b>       | PhMe (0.5 mL) | 25     | 1:1.5        | 83                     | 81:19           | 51:49           |
| 9     | <b>L9</b>       | PhMe (0.5 mL) | 25     | 1:1.5        | 85                     | 82:18           | 50:50           |
| 10    | <b>L10</b>      | PhMe (0.5 mL) | 25     | 1:1.5        | 82                     | 84:16           | 50:50           |
| 11    | <b>L11</b>      | PhMe (0.5 mL) | 25     | 1:1.5        | 86                     | 81:19           | 50:50           |

|    |            |                           |     |       |    |       |       |
|----|------------|---------------------------|-----|-------|----|-------|-------|
| 12 | <b>L12</b> | PhMe (0.5 mL)             | 25  | 1:1.5 | 89 | 83:17 | 50:50 |
| 13 | <b>L13</b> | PhMe (0.5 mL)             | 25  | 1:1.5 | 60 | 79:21 | 75:25 |
| 14 | <b>L14</b> | PhMe (0.5 mL)             | 25  | 1:1.5 | 75 | 80:20 | 54:46 |
| 15 | <b>L15</b> | PhMe (0.5 mL)             | 25  | 1:1.5 | 63 | 79:21 | 53:47 |
| 16 | <b>L16</b> | PhMe (0.5 mL)             | 25  | 1:1.5 | 69 | 75:25 | 54:46 |
| 17 | <b>L17</b> | PhMe (0.5 mL)             | 25  | 1:1.5 | 83 | 77:23 | 57:43 |
| 18 | <b>L18</b> | PhMe (0.5 mL)             | 25  | 1:1.5 | 86 | 79:21 | 57:43 |
| 19 | <b>L19</b> | PhMe (0.5 mL)             | 25  | 1:1.5 | 45 | 78:22 | 51:49 |
| 20 | <b>L20</b> | PhMe (0.5 mL)             | 25  | 1:1.5 | 85 | 88:12 | 76:24 |
| 21 | <b>L20</b> | 1,4-dioxane<br>(0.5 mL)   | 25  | 1:1.5 | 90 | 75:25 | 55:45 |
| 22 | <b>L20</b> | acetone (0.5 mL)          | 25  | 1:1.5 | 93 | 81:19 | 64:36 |
| 23 | <b>L20</b> | EtOAc (0.5 mL)            | 25  | 1:1.5 | 85 | 77:23 | 70:30 |
| 24 | <b>L20</b> | DCE (0.5 mL)              | 25  | 1:1.5 | 94 | 82:18 | 69:31 |
| 25 | <b>L20</b> | MeCN (0.5 mL)             | 25  | 1:1.5 | 98 | 80:20 | 55:45 |
| 26 | <b>L20</b> | <i>p</i> -xylene (0.5 mL) | 25  | 1:1.5 | 84 | 88:12 | 72:28 |
| 27 | <b>L20</b> | <i>o</i> -xylene (0.5 mL) | 25  | 1:1.5 | 60 | 87:13 | 69:31 |
| 28 | <b>L20</b> | <i>m</i> -xylene (0.5 mL) | 25  | 1:1.5 | 82 | 87:13 | 71:29 |
| 29 | <b>L20</b> | FPh (0.5 mL)              | 25  | 1:1.5 | 83 | 86:14 | 73:27 |
| 30 | <b>L20</b> | ClPh (0.5 mL)             | 25  | 1:1.5 | 86 | 87:13 | 77:23 |
| 31 | <b>L20</b> | BrPh (0.5 mL)             | 25  | 1:1.5 | 78 | 86:14 | 79:21 |
| 32 | <b>L20</b> | BrPh (1 mL)               | 25  | 1:1.5 | 80 | 84:16 | 79:21 |
| 33 | <b>L20</b> | BrPh (2 mL)               | 25  | 1:1.5 | 79 | 79:21 | 81:19 |
| 34 | <b>L20</b> | BrPh (4 mL)               | 25  | 1:1.5 | 83 | 88:12 | 83:17 |
| 35 | <b>L20</b> | BrPh (8 mL)               | 25  | 1:1.5 | 82 | 86:14 | 81:19 |
| 36 | <b>L20</b> | BrPh (4 mL)               | -30 | 1:1.5 | 80 | 81:19 | 85:15 |
| 37 | <b>L20</b> | BrPh (4 mL)               | -20 | 1:1.5 | 81 | 87:13 | 87:13 |
| 38 | <b>L20</b> | BrPh (4 mL)               | -15 | 1:1.5 | 83 | 88:12 | 89:11 |
| 39 | <b>L20</b> | BrPh (4 mL)               | 0   | 1:1.5 | 82 | 85:15 | 86:14 |
| 40 | <b>L20</b> | BrPh (4 mL)               | 50  | 1:1.5 | 90 | 87:13 | 83:17 |
| 41 | <b>L20</b> | BrPh (4 mL)               | -15 | 1:1   | 81 | 81:19 | 89:11 |
| 42 | <b>L20</b> | BrPh (4 mL)               | -15 | 1:2   | 83 | 85:15 | 88:12 |
| 43 | <b>L20</b> | BrPh (4 mL)               | -15 | 1:3   | 83 | 83:17 | 88:12 |
| 44 | <b>L20</b> | BrPh (4 mL)               | -15 | 2:1   | 80 | 84:16 | 93:7  |
| 45 | <b>L20</b> | BrPh (4 mL)               | -15 | 4:1   | 75 | 84:16 | 90:10 |

<sup>a</sup>The reaction was carried out at the 0.05 mmol scale in a solvent at T °C for 1.5 h. <sup>b</sup>Isolated yield. <sup>c</sup>The dr value was determined by <sup>1</sup>H NMR spectroscopy. <sup>d</sup>The er value was determined by HPLC and referred to that of the major diastereomer.

We performed a preliminary investigation on the catalytic asymmetric version of the formal [4+2] cycloaddition (Scheme S1). After condition optimization (Table S2), we found that the cooperative catalytic system of iridium and chiral thiourea-tertiary amine **L20** could promote the

reaction to provide a chiral **3aa** in a high yield (80%), a considerable diastereoselectivity of 84:16 dr and a high enantioselectivity of 93:7 er. Under the optimal conditions, several chiral products of **3** were synthesized in moderate to good diastereo- and enantioselectivities. A possible activation mode of the cooperative catalysis was suggested to explain the generation of chiral **3aa** with the observed (3*R*,4*S*)-configuration. The iridium catalyst and chiral thiourea-tertiary amine catalyst simultaneously activated the two reaction partners, and the enantioselectivity was achieved by the stereocontrol of the chiral thiourea-tertiary amine on the azlactones via hydrogen-bonding interactions. Therefore, the catalytic asymmetric version also provided a cooperative catalysis-enabled reaction for vinyl benzoxazinones. Notably, this reaction has established a scarcely reported cooperative catalysis of iridium and chiral H-bonding catalyst.

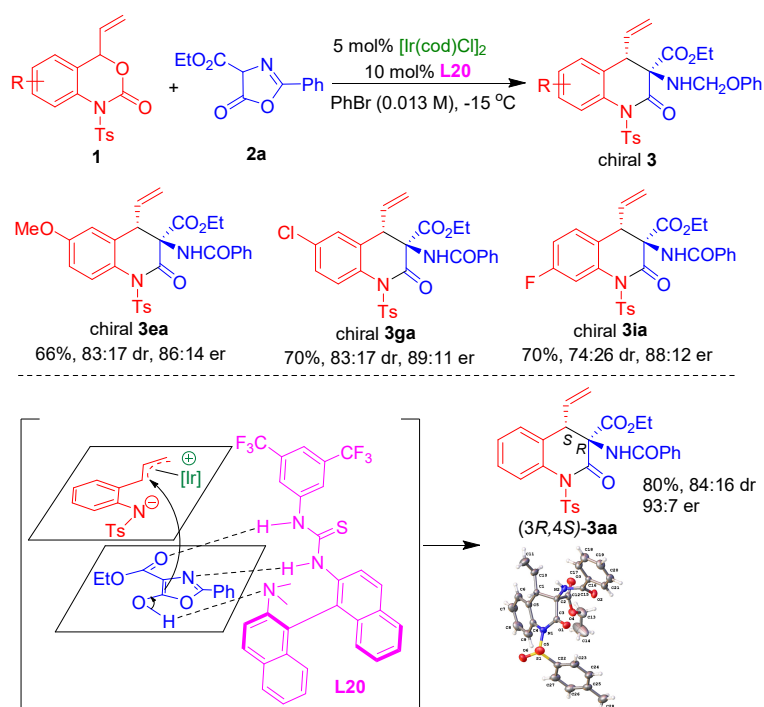

**Scheme S1.** Investigation on the catalytic asymmetric version.

### 3. Effect of the C4-substituent of azlactones on the chemoselectivity and the generality of the substitution reactions

As suggested in Scheme S2, when azlactone **4a** attacked the  $\pi$ -allyl-Ir intermediate, the branch-selective allylic alkylation was disfavored due to the existence of the bulky C4-phenyl group. In contrast, the linear-selective allylic alkylation was favored because there was less steric hindrance when azlactone **4a** attacked the  $\pi$ -allyl-Ir intermediate from the terminal position. Thus, the favored linear-selective allylic alkylation resulted in the formation of **5aa**. However, apart from steric effect, the softness/hardness of azlactones **4** bearing different C4-substituents should also account for the observed chemoselectivity.

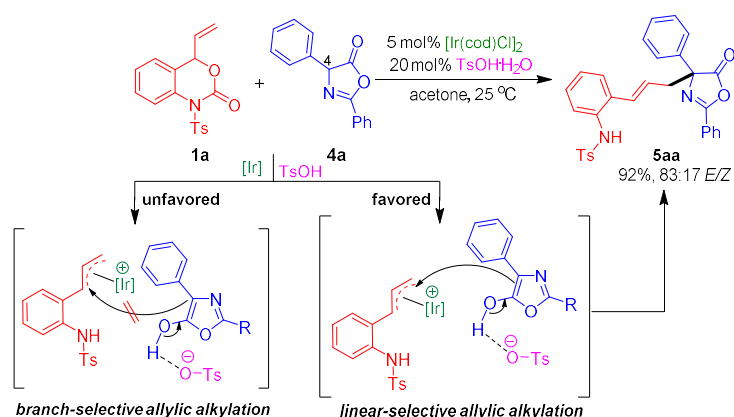

**Scheme S2.** Effect of the C4-substituent of azlactones on the chemoselectivity.

**Table S3.** Generality of the substitution reactions<sup>a</sup>

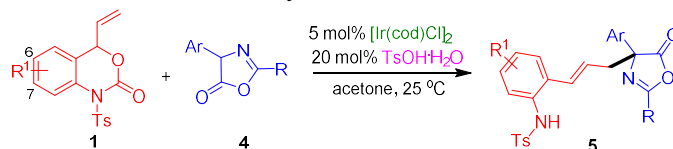

| entry | <b>5</b>   | R <sup>1</sup> ( <b>1</b> ) | R/Ar ( <b>4</b> )                                           | E/Z <sup>b</sup> | yield (%) <sup>c</sup> |
|-------|------------|-----------------------------|-------------------------------------------------------------|------------------|------------------------|
| 1     | <b>5aa</b> | H ( <b>1a</b> )             | Ph/Ph ( <b>4a</b> )                                         | 83:17            | 92                     |
| 2     | <b>5ab</b> | H ( <b>1a</b> )             | <i>o</i> -ClC <sub>6</sub> H <sub>4</sub> /Ph ( <b>4b</b> ) | 95:5             | 95                     |
| 3     | <b>5ac</b> | H ( <b>1a</b> )             | <i>m</i> -ClC <sub>6</sub> H <sub>4</sub> /Ph ( <b>4c</b> ) | 91:9             | 51                     |
| 4     | <b>5ad</b> | H ( <b>1a</b> )             | <i>p</i> -MeC <sub>6</sub> H <sub>4</sub> /Ph ( <b>4d</b> ) | 91:9             | 87                     |
| 5     | <b>5ae</b> | H ( <b>1a</b> )             | Ph/ <i>m</i> -ClC <sub>6</sub> H <sub>4</sub> ( <b>4e</b> ) | 83:17            | 95                     |
| 6     | <b>5af</b> | H ( <b>1a</b> )             | Ph/ <i>p</i> -FC <sub>6</sub> H <sub>4</sub> ( <b>4f</b> )  | 83:17            | 83                     |
| 7     | <b>5da</b> | 6-Me ( <b>1d</b> )          | Ph/Ph ( <b>4a</b> )                                         | >95:5            | 80                     |
| 8     | <b>5ea</b> | 6-OMe ( <b>1e</b> )         | Ph/Ph ( <b>4a</b> )                                         | 93:7             | 83                     |
| 9     | <b>5fa</b> | 6-F ( <b>1f</b> )           | Ph/Ph ( <b>4a</b> )                                         | 89:11            | 51                     |
| 10    | <b>5ga</b> | 6-Cl ( <b>1g</b> )          | Ph/Ph ( <b>4a</b> )                                         | 87:13            | 70                     |
| 11    | <b>5ha</b> | 6-Br ( <b>1h</b> )          | Ph/Ph ( <b>4a</b> )                                         | 83:17            | 82                     |
| 12    | <b>5ia</b> | 7-F ( <b>1i</b> )           | Ph/Ph ( <b>4a</b> )                                         | >95:5            | 93                     |

<sup>a</sup>The reaction was carried out at the 0.1 mmol scale in acetone (0.025 M) at 25 °C for 1.5 h, and the molar ratio of **1**:**4** was 1:1.5. <sup>b</sup>The E/Z value was determined by <sup>1</sup>H NMR spectroscopy. <sup>c</sup>Isolated yield.

#### 4. Procedure for the synthesis of products 3 and characterization data

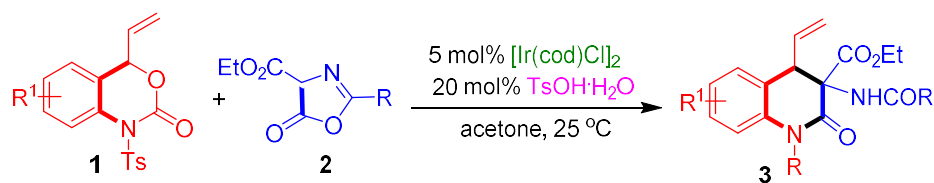

Under an argon atmosphere, acetone (4 mL) was added to the mixture of vinyl benzoxazinone **1** (0.1 mmol), azlactone **2** (0.15 mmol), [Ir(COD)Cl]<sub>2</sub> (3.4 mg, 0.005 mmol) and TsOH·H<sub>2</sub>O (4.0 mg, 0.02 mmol). Then, the reaction mixture was stirred at 25 °C for 1.5 hours. After the completion of the reaction, which was indicated by TLC, the reaction mixture was directly purified through preparative thin layer chromatography to afford pure product **3**.

#### **ethyl 3-benzamido-2-oxo-1-tosyl-4-vinyl-1,2,3,4-tetrahydroquinoline-3-carboxylate (3aa):**

Following the general procedure, under an argon atmosphere, acetone (4 mL) was added to the mixture of vinyl benzoxazinone **1a** (32.9 mg, 0.1 mmol), azlactone **2a** (35 mg, 0.15 mmol), [Ir(COD)Cl]<sub>2</sub> (3.4 mg, 0.005 mmol) and TsOH·H<sub>2</sub>O (4.0 mg, 0.02 mmol). Then, the reaction mixture was stirred at 25 °C for 1.5 hours. After the completion of the reaction, which was indicated by TLC, the reaction mixture was directly purified through preparative thin layer chromatography (toluene/ethyl acetate = 20:1) to afford pure product **3aa** (48.7 mg) in 94% yield as light yellow solid.

m.p. 78-79 °C; inseparable diastereomers (dr= 94:6); <sup>1</sup>H NMR (400 MHz, CDCl<sub>3</sub>) δ 8.07 (d, *J* = 8.3 Hz, 2H), 7.74 (d, *J* = 8.1 Hz, 1H), 7.60 (d, *J* = 7.4 Hz, 2H), 7.51 – 7.46 (m, 1H), 7.40 – 7.34 (m, 5H), 7.20 (d, *J* = 7.5 Hz, 1H), 7.14 (d, *J* = 7.6 Hz, 1H), 7.03 (s, 1H), 5.82 – 5.69 (m, 1H), 5.47 (d, *J* = 10.1 Hz, 1H), 5.33 (d, *J* = 16.9 Hz, 1H), 4.97 (d, *J* = 9.5 Hz, 1H), 4.01 – 3.91 (m, 1H), 3.86 – 3.76 (m, 1H), 2.47 (s, 3H), 0.71 (t, *J* = 7.1 Hz, 3H); <sup>13</sup>C NMR (100 MHz, CDCl<sub>3</sub>) δ 166.1, 165.9, 165.4, 145.1, 135.6, 135.1, 133.4, 131.9, 130.9, 129.7, 129.3, 128.5, 128.3, 127.6, 126.9, 126.2, 126.1, 123.7, 122.2, 68.3, 62.9, 45.5, 21.8, 13.2; IR (KBr): 2986, 1733, 1669, 1506, 1265, 1159, 933, 740 cm<sup>-1</sup>; HRMS (ESI-TOF) *m/z*: [M - H]<sup>-</sup> Calcd for C<sub>28</sub>H<sub>25</sub>N<sub>2</sub>O<sub>6</sub>S 517.1434, found 517.1422.

#### **ethyl 3-benzamido-5-methyl-2-oxo-1-tosyl-4-vinyl-1,2,3,4-tetrahydroquinoline-3-carboxylate (3ba):**

Following the general procedure, under an argon atmosphere, acetone (4 mL) was added to

the mixture of vinyl benzoxazinanone **1b** (34.3 mg, 0.1 mmol), azlactone **2a** (35 mg, 0.15 mmol),  $[\text{Ir}(\text{COD})\text{Cl}]_2$  (3.4 mg, 0.005 mmol) and  $\text{TsOH}\cdot\text{H}_2\text{O}$  (4.0 mg, 0.02 mmol). Then, the reaction mixture was stirred at 25 °C for 1.5 hours. After the completion of the reaction, which was indicated by TLC, the reaction mixture was directly purified through preparative thin layer chromatography (toluene/ethyl acetate = 20:1) to afford pure product **3ba** (45.8 mg) in 86% yield as light yellow solid.

m.p. 85-86 °C; inseparable diastereomers (dr > 95:5);  $^1\text{H}$  NMR (400 MHz,  $\text{CDCl}_3$ )  $\delta$  8.04 (d,  $J$  = 8.3 Hz, 2H), 7.54 (d,  $J$  = 8.2 Hz, 1H), 7.49 – 7.26 (m, 7H), 7.22 (t,  $J$  = 8.0 Hz, 1H), 7.02 (d,  $J$  = 7.6 Hz, 1H), 6.68 (s, 1H), 6.11 – 5.98 (m, 1H), 5.12 – 4.94 (m, 2H), 4.43 (d,  $J$  = 7.5 Hz, 1H), 4.32 – 4.13 (m, 2H), 2.45 (s, 3H), 2.25 (s, 3H), 1.21 (t,  $J$  = 7.1 Hz, 3H);  $^{13}\text{C}$  NMR (100 MHz,  $\text{CDCl}_3$ )  $\delta$  162.7, 161.7, 160.4, 140.5, 131.6, 131.3, 130.6, 128.6, 128.5, 127.2, 124.7, 124.6, 123.8, 122.7, 122.5, 122.1, 116.0, 113.7, 100.0, 63.0, 57.9, 43.2, 17.0, 14.3, 9.1; IR (KBr): 2962, 1735, 1654, 1473, 1260, 1085, 798, 668  $\text{cm}^{-1}$ ; HRMS (ESI-TOF)  $m/z$ :  $[\text{M} - \text{H}]^-$  Calcd for  $\text{C}_{29}\text{H}_{27}\text{N}_2\text{O}_6\text{S}$  531.1590, found 531.1598.

**ethyl 3-benzamido-5-chloro-2-oxo-1-tosyl-4-vinyl-1,2,3,4-tetrahydroquinoline-3-carboxylate (3ca)**: Following the general procedure, under an argon atmosphere, acetone (4 mL) was added to the mixture of vinyl benzoxazinanone **1c** (36.3 mg, 0.1 mmol), azlactone **2a** (35 mg, 0.15 mmol),  $[\text{Ir}(\text{COD})\text{Cl}]_2$  (3.4 mg, 0.005 mmol) and  $\text{TsOH}\cdot\text{H}_2\text{O}$  (4.0 mg, 0.02 mmol). Then, the reaction mixture was stirred at 25 °C for 1.5 hours. After the completion of the reaction, which was indicated by TLC, the reaction mixture was directly purified through preparative thin layer chromatography (toluene/ethyl acetate = 20:1) to afford pure product **3ca** (44.2mg) in 80% yield as light yellow solid.

m.p. 74-75 °C; inseparable diastereomers (dr > 95:5);  $^1\text{H}$  NMR (400 MHz,  $\text{CDCl}_3$ )  $\delta$  8.11 (d,  $J$  = 8.1 Hz, 2H), 7.55 – 7.41 (m, 4H), 7.41 – 7.30 (m, 4H), 7.25 – 7.15 (m, 2H), 6.99 (s, 1H), 6.07 – 5.92 (m, 1H), 5.21 (d,  $J$  = 16.9 Hz, 1H), 5.11 (d,  $J$  = 10.1 Hz, 1H), 4.40 (d,  $J$  = 8.8 Hz, 1H), 4.32 – 4.14 (m, 2H), 2.46 (s, 3H), 1.23 (t,  $J$  = 7.2 Hz, 3H);  $^{13}\text{C}$  NMR (100 MHz,  $\text{CDCl}_3$ )  $\delta$  163.0, 161.3, 160.6, 140.5, 132.6, 131.6, 128.3, 128.1, 127.7, 127.3, 124.9, 124.2, 123.8, 122.3, 116.1, 114.0, 62.9, 58.4, 46.1, 17.0, 9.0; IR (KBr): 2917, 1738, 1651, 1454, 1259, 1169, 992, 749  $\text{cm}^{-1}$ ; HRMS (ESI-TOF)  $m/z$ :  $[\text{M} - \text{H}]^-$  Calcd for  $\text{C}_{28}\text{H}_{24}\text{ClN}_2\text{O}_6\text{S}$  551.1044, found 551.1041.



**ethyl 3-benzamido-6-methyl-2-oxo-1-tosyl-4-vinyl-1,2,3,4-tetrahydroquinoline-3-carboxylate**

**(3da):** Following the general procedure, under an argon atmosphere, acetone (4 mL) was added to the mixture of vinyl benzoxazinane **1d** (34.3 mg, 0.1 mmol), azlactone **2a** (35 mg, 0.15 mmol), [Ir(COD)Cl]<sub>2</sub> (3.4 mg, 0.005 mmol) and TsOH·H<sub>2</sub>O (4.0 mg, 0.02 mmol). Then, the reaction mixture was stirred at 25 °C for 1.5 hours. After the completion of the reaction, which was indicated by TLC, the reaction mixture was directly purified through preparative thin layer chromatography (toluene/ethyl acetate = 20:1) to afford pure product **3da** (44.2 mg) in 83% yield as light yellow solid.

m.p. 80-81 °C; inseparable diastereomers (dr > 95:5); <sup>1</sup>H NMR (400 MHz, CDCl<sub>3</sub>) δ 8.06 (d, *J* = 8.3 Hz, 2H), 7.65 – 7.57 (m, 3H), 7.51 – 7.46 (m, 1H), 7.42 – 7.33 (m, 4H), 7.17 (d, *J* = 8.3 Hz, 1H), 7.00 (s, 1H), 6.94 (s, 1H), 5.84 – 5.70 (m, 1H), 5.47 (d, *J* = 10.1 Hz, 1H), 5.32 (d, *J* = 16.8 Hz, 1H), 4.90 (d, *J* = 9.4 Hz, 1H), 4.04 – 3.91 (m, 1H), 3.84 – 3.74 (m, 1H), 2.47 (s, 3H), 2.34 (s, 3H), 0.73 (t, *J* = 7.1 Hz, 3H); <sup>13</sup>C NMR (100 MHz, CDCl<sub>3</sub>) δ 166.2, 165.9, 165.4, 145.0, 135.9, 135.7, 133.4, 132.6, 131.9, 131.1, 129.6, 129.2, 128.5, 128.1, 128.0, 127.0, 126.7, 123.5, 122.1, 68.3, 62.9, 45.6, 21.7, 21.0, 13.2; IR (KBr): 3126, 1733, 1669, 1399, 1172, 1086, 811, 668 cm<sup>-1</sup>; HRMS (ESI-TOF) *m/z*: [M - H]<sup>-</sup> Calcd for C<sub>29</sub>H<sub>27</sub>N<sub>2</sub>O<sub>6</sub>S 531.1590, found 531.1600.

**ethyl**

**3-benzamido-6-methoxy-2-oxo-1-tosyl-4-vinyl-1,2,3,4-tetrahydroquinoline-3-carboxylate**

**(3ea):** Following the general procedure, under an argon atmosphere, acetone (4 mL) was added to the mixture of vinyl benzoxazinane **1e** (35.9 mg, 0.1 mmol), azlactone **2a** (35 mg, 0.15 mmol), [Ir(COD)Cl]<sub>2</sub> (3.4 mg, 0.005 mmol) and TsOH·H<sub>2</sub>O (4.0 mg, 0.02 mmol). Then, the reaction mixture was stirred at 25 °C for 1.5 hours. After the completion of the reaction, which was indicated by TLC, the reaction mixture was directly purified through preparative thin layer chromatography (toluene/ethyl acetate = 20:1) to afford pure product **3ea** (46.1 mg) in 84% yield as light yellow solid.

m.p. 78-79 °C; inseparable diastereomers (dr > 95:5); <sup>1</sup>H NMR (400 MHz, CDCl<sub>3</sub>) δ 8.04 (d, *J* = 8.3 Hz, 2H), 7.65 (d, *J* = 8.9 Hz, 1H), 7.60 (d, *J* = 7.3 Hz, 2H), 7.51 – 7.46 (m, 1H), 7.42 – 7.33 (m, 4H), 7.01 (s, 1H), 6.92 – 6.85 (m, 1H), 6.69 (d, *J* = 1.9 Hz, 1H), 5.82 – 5.68 (m, 1H), 5.46 (d,

$J = 10.1$  Hz, 1H), 5.31 (d,  $J = 16.8$  Hz, 1H), 4.89 (d,  $J = 8.9$  Hz, 1H), 4.04 – 3.93 (m, 1H), 3.90 – 3.81 (m, 1H), 3.80 (s, 3H), 2.47 (s, 3H), 0.78 (t,  $J = 7.1$  Hz, 3H);  $^{13}\text{C}$  NMR (100 MHz,  $\text{CDCl}_3$ )  $\delta$  166.1, 165.9, 165.3, 157.7, 145.0, 135.6, 133.4, 131.9, 130.8, 130.0, 129.6, 129.2, 128.5, 128.1, 127.0, 123.8, 123.5, 112.5, 111.8, 68.3, 62.9, 55.6, 45.7, 21.7, 13.3; IR (KBr): 2982, 1733, 1670, 1489, 1219, 1152, 936, 710  $\text{cm}^{-1}$ ; HRMS (ESI-TOF)  $m/z$ : [M - H]<sup>-</sup> Calcd for  $\text{C}_{29}\text{H}_{27}\text{N}_2\text{O}_7\text{S}$  547.1539, found 547.1536;

**ethyl 3-benzamido-6-fluoro-2-oxo-1-tosyl-4-vinyl-1,2,3,4-tetrahydroquinoline-3-carboxylate (3fa):**

Following the general procedure, under an argon atmosphere, acetone (4 mL) was added to the mixture of vinyl benzoxazinanone **1f** (34.7 mg, 0.1 mmol), azlactone **2a** (35 mg, 0.15 mmol),  $[\text{Ir}(\text{COD})\text{Cl}]_2$  (3.4 mg, 0.005 mmol) and  $\text{TsOH}\cdot\text{H}_2\text{O}$  (4.0 mg, 0.02 mmol). Then, the reaction mixture was stirred at 25 °C for 1.5 hours. After the completion of the reaction, which was indicated by TLC, the reaction mixture was directly purified through preparative thin layer chromatography (toluene/ethyl acetate = 20:1) to afford pure product **3fa** (49.8 mg) in 93% yield as light yellow solid.

m.p. 83-84 °C; inseparable diastereomers (dr =95:5);  $^1\text{H}$  NMR (400 MHz,  $\text{CDCl}_3$ )  $\delta$  8.05 (d,  $J = 8.3$  Hz, 2H), 7.75 – 7.69 (m, 1H), 7.58 (d,  $J = 7.4$  Hz, 2H), 7.52 – 7.46 (t,  $J = 7.3$  Hz, 1H), 7.42 – 7.35 (m, 4H), 7.12 – 7.03 (m, 2H), 6.93 – 6.85 (m, 1H), 5.75 – 5.59 (m, 1H), 5.48 (d,  $J = 10.1$  Hz, 1H), 5.33 (d,  $J = 16.8$  Hz, 1H), 4.98 (d,  $J = 9.5$  Hz, 1H), 4.08 – 3.95 (m, 1H), 3.91 – 3.81 (m, 1H), 2.48 (s, 3H), 0.79 (t,  $J = 7.1$  Hz, 3H);  $^{13}\text{C}$  NMR (100 MHz,  $\text{CDCl}_3$ )  $\delta$  165.9, 165.0, 160.6 ( $J = 250$  Hz), 145.3, 135.3, 133.2, 132.0, 131.0, 130.2, 129.8, 129.3, 128.5, 127.0, 124.3, 123.9 ( $J = 10$  Hz), 114.2, 114.0, 113.5 ( $J = 20$  Hz), 68.2, 63.2, 45.3, 21.8, 13.3; IR (KBr): 2978, 1744, 1671, 1487, 1367, 1173, 931, 708  $\text{cm}^{-1}$ ; HRMS (ESI-TOF)  $m/z$ : [M - H]<sup>-</sup> Calcd for  $\text{C}_{28}\text{H}_{24}\text{FN}_2\text{O}_6\text{S}$  535.1339, found 535.1330.

**ethyl 3-benzamido-6-chloro-2-oxo-1-tosyl-4-vinyl-1,2,3,4-tetrahydroquinoline-3-carboxylate (3ga):** Following the general procedure, under an argon atmosphere, acetone (4 mL) was added to the mixture of vinyl benzoxazinanone **1g** (36.3 mg, 0.1 mmol), azlactone **2a** (35 mg, 0.15 mmol),  $[\text{Ir}(\text{COD})\text{Cl}]_2$  (3.4 mg, 0.005 mmol) and  $\text{TsOH}\cdot\text{H}_2\text{O}$  (4.0 mg, 0.02 mmol). Then, the reaction

mixture was stirred at 25 °C for 1.5 hours. After the completion of the reaction, which was indicated by TLC, the reaction mixture was directly purified through preparative thin layer chromatography (toluene/ethyl acetate = 20:1) to afford pure product **3ga** (45.8 mg) in 83% yield as light yellow solid.

m.p. 74-75 °C; inseparable diastereomers (dr > 95:5); <sup>1</sup>H NMR (400 MHz, CDCl<sub>3</sub>) δ 8.05 (d, *J* = 8.3 Hz, 2H), 7.70 (d, *J* = 8.7 Hz, 1H), 7.57 (d, *J* = 7.3 Hz, 2H), 7.52 – 7.47 (m, 1H), 7.43 – 7.31 (m, 5H), 7.13 (s, 1H), 7.09 (s, 1H), 5.73 – 5.59 (m, 1H), 5.49 (d, *J* = 10.0 Hz, 1H), 5.33 (d, *J* = 16.7 Hz, 1H), 4.99 (d, *J* = 9.6 Hz, 1H), 4.09 – 3.98 (m, 1H), 3.91 – 3.80 (m, 1H), 2.48 (s, 3H), 0.79 (t, *J* = 7.1 Hz, 3H); <sup>13</sup>C NMR (100 MHz, CDCl<sub>3</sub>) δ 165.9, 165.8, 164.9, 145.4, 135.1, 133.6, 133.2, 132.0, 131.7, 130.5, 130.1, 129.9, 129.3, 128.5, 127.4, 126.9, 126.3, 124.5, 123.4, 68.1, 63.3, 45.2, 21.8, 13.3; IR (KBr): 3124, 1734, 1670, 1479, 1399, 1154, 935, 810 cm<sup>-1</sup>; HRMS (ESI-TOF) *m/z*: [M - H]<sup>-</sup> Calcd for C<sub>28</sub>H<sub>24</sub>ClN<sub>2</sub>O<sub>6</sub>S 551.1044, found 551.1040.

**ethyl 3-benzamido-6-bromo-2-oxo-1-tosyl-4-vinyl-1,2,3,4-tetrahydroquinoline-3-carboxylate (3ha)**: Following the general procedure, under an argon atmosphere, acetone (4 mL) was added to the mixture of vinyl benzoxazinone **1h** (40.6 mg, 0.1 mmol), azlactone **2a** (35 mg, 0.15 mmol), [Ir(COD)Cl]<sub>2</sub> (3.4 mg, 0.005 mmol) and TsOH·H<sub>2</sub>O (4.0 mg, 0.02 mmol). Then, the reaction mixture was stirred at 25 °C for 1.5 hours. After the completion of the reaction, which was indicated by TLC, the reaction mixture was directly purified through preparative thin layer chromatography (toluene/ethyl acetate = 20:1) to afford pure product **3ha** (54.8 mg) in 92% yield as light yellow solid.

m.p. 80-81 °C; inseparable diastereomers (dr > 95:5); <sup>1</sup>H NMR (400 MHz, CDCl<sub>3</sub>) δ 8.05 (d, *J* = 8.3 Hz, 2H), 7.64 (d, *J* = 8.7 Hz, 1H), 7.57 (d, *J* = 7.3 Hz, 2H), 7.52 – 7.47 (m, 2H), 7.42 – 7.36 (m, 4H), 7.27 (s, 1H), 7.09 (s, 1H), 5.73 – 5.58 (m, 1H), 5.49 (d, *J* = 10.0 Hz, 1H), 5.33 (d, *J* = 16.7 Hz, 1H), 4.99 (d, *J* = 9.5 Hz, 1H), 4.10 – 3.99 (m, 1H), 3.91 – 3.80 (m, 1H), 2.48 (s, 3H), 0.79 (t, *J* = 7.1 Hz, 3H); <sup>13</sup>C NMR (100 MHz, CDCl<sub>3</sub>) δ 165.8, 164.8, 145.4, 135.1, 134.1, 133.2, 132.0, 130.7, 130.4, 130.0, 129.9, 129.3, 129.2, 128.5, 126.9, 124.5, 123.7, 119.5, 68.2, 63.3, 45.1, 21.8, 13.3; IR (KBr): 2983, 1733, 1669, 1476, 1362, 1155, 1085, 933, 749 cm<sup>-1</sup>; HRMS (ESI-TOF) *m/z*: [M - H]<sup>-</sup> Calcd for C<sub>28</sub>H<sub>24</sub>BrN<sub>2</sub>O<sub>6</sub>S 595.0539, found 595.0544.

**ethyl 3-benzamido-7-fluoro-2-oxo-1-tosyl-4-vinyl-1,2,3,4-tetrahydroquinoline-3-carboxylate**

**(3ia):** Following the general procedure, under an argon atmosphere, acetone (4 mL) was added to the mixture of vinyl benzoxazinanone **1i** (34.7 mg, 0.1 mmol), azlactone **2a** (35 mg, 0.15 mmol), [Ir(COD)Cl]<sub>2</sub> (3.4 mg, 0.005 mmol) and TsOH·H<sub>2</sub>O (4.0 mg, 0.02 mmol). Then, the reaction mixture was stirred at 25 °C for 1.5 hours. After the completion of the reaction, which was indicated by TLC, the reaction mixture was directly purified through preparative thin layer chromatography (toluene/ethyl acetate = 20:1) to afford pure product **3ia** (48.2 mg) in 90% yield as light yellow solid.

m.p. 129-130 °C; inseparable diastereomers (dr = 92:8); <sup>1</sup>H NMR (400 MHz, CDCl<sub>3</sub>) δ 8.07 (d, *J* = 8.3 Hz, 2H), 7.60 (d, *J* = 7.5 Hz, 2H), 7.57 – 7.52 (m, 1H), 7.52 – 7.47 (m, 1H), 7.42 – 7.36 (m, 4H), 7.13 – 7.07 (m, 1H), 7.05 (s, 1H), 6.97 – 6.90 (m, 1H), 5.78 – 5.63 (m, 1H), 5.47 (d, *J* = 10.0 Hz, 1H), 5.32 (d, *J* = 16.8 Hz, 1H), 4.92 (d, *J* = 9.5 Hz, 1H), 4.07 – 3.96 (m, 1H), 3.89 – 3.80 (m, 1H), 2.48 (s, 3H), 0.79 (t, *J* = 7.1 Hz, 3H); <sup>13</sup>C NMR (100 MHz, CDCl<sub>3</sub>) δ 167.0, 165.9, 165.1, 161.7 (*J* = 240 Hz), 145.4, 136.1, 135.3, 133.2, 132.0, 130.6 (*J* = 10 Hz), 129.7, 129.4, 128.5, 127.3 (*J* = 10 Hz), 126.7, 124.1, 124.0, 112.6 (*J* = 20 Hz), 110.2 (*J* = 30 Hz), 68.2, 63.1, 45.0, 21.8, 13.3; IR (KBr): 2988, 1748, 1670, 1507, 1275, 1177, 847, 750 cm<sup>-1</sup>; HRMS (ESI-TOF) *m/z*: [M - H]<sup>-</sup> Calcd for C<sub>28</sub>H<sub>24</sub>FN<sub>2</sub>O<sub>6</sub>S 535.1339, found 535.1351.

**ethyl 3-benzamido-7-chloro-2-oxo-1-tosyl-4-vinyl-1,2,3,4-tetrahydroquinoline-3-carboxylate**

**(3ja):** Following the general procedure, under an argon atmosphere, acetone (4 mL) was added to the mixture of vinyl benzoxazinanone **1j** (36.3 mg, 0.1 mmol), azlactone **2a** (35 mg, 0.15 mmol), [Ir(COD)Cl]<sub>2</sub> (3.4 mg, 0.005 mmol) and TsOH·H<sub>2</sub>O (4.0 mg, 0.02 mmol). Then, the reaction mixture was stirred at 25 °C for 1.5 hours. After the completion of the reaction, which was indicated by TLC, the reaction mixture was directly purified through preparative thin layer chromatography (toluene/ethyl acetate = 20:1) to afford pure product **3ja** (44.7 mg) in 81% yield as light yellow solid.

m.p. 72-73 °C; inseparable diastereomers (dr = 91:9); <sup>1</sup>H NMR (400 MHz, CDCl<sub>3</sub>) δ 8.06 (d, *J* = 8.2 Hz, 2H), 7.79 (d, *J* = 1.6 Hz, 1H), 7.59 (d, *J* = 7.5 Hz, 2H), 7.52 – 7.47 (m, 1H), 7.42 – 7.36 (m, 4H), 7.23 – 7.18 (m, 1H), 7.13 – 7.01 (m, 2H), 5.76 – 5.62 (m, 1H), 5.47 (d, *J* = 10.0 Hz, 1H), 5.32 (d, *J* = 16.8 Hz, 1H), 4.95 (d, *J* = 9.6 Hz, 1H), 4.06 – 3.95 (m, 1H), 3.90 – 3.81 (m, 1H), 2.49

(s, 3H), 0.79 (t,  $J = 7.1$  Hz, 3H);  $^{13}\text{C}$  NMR (100 MHz,  $\text{CDCl}_3$ )  $\delta$  165.9, 165.8, 165.0, 145.4, 135.9, 135.2, 133.3, 133.2, 132.0, 130.4, 129.8, 129.3, 128.5, 127.2, 127.0, 126.9, 125.9, 124.2, 122.3, 68.2, 63.2, 45.0, 21.8, 13.3; IR (KBr): 2963, 1743, 1649, 1482, 1366, 1158, 941, 807  $\text{cm}^{-1}$ ; HRMS (ESI-TOF)  $m/z$ :  $[\text{M} - \text{H}]^-$  Calcd for  $\text{C}_{28}\text{H}_{24}\text{ClN}_2\text{O}_6\text{S}$  551.1044, found 551.1062.

**ethyl 3-benzamido-8-methyl-2-oxo-1-tosyl-4-vinyl-1,2,3,4-tetrahydroquinoline-3-carboxylate (3ka)**: Following the general procedure, under an argon atmosphere, acetone (4 mL) was added to the mixture of vinyl benzoxazinone **1k** (34.3 mg, 0.1 mmol), azlactone **2a** (35 mg, 0.15 mmol),  $[\text{Ir}(\text{COD})\text{Cl}]_2$  (3.4 mg, 0.005 mmol) and  $\text{TsOH}\cdot\text{H}_2\text{O}$  (4.0 mg, 0.02 mmol). Then, the reaction mixture was stirred at 25  $^\circ\text{C}$  for 1.5 hours. After the completion of the reaction, which was indicated by TLC, the reaction mixture was directly purified through preparative thin layer chromatography (toluene/ethyl acetate = 20:1) to afford pure product **3ka** (46.8 mg) in 88% yield as light yellow solid.

m.p. 79-80  $^\circ\text{C}$ ; inseparable diastereomers (dr = 95:5);  $^1\text{H}$  NMR (400 MHz,  $\text{CDCl}_3$ )  $\delta$  7.96 (d,  $J = 8.2$  Hz, 2H), 7.57 (d,  $J = 7.4$  Hz, 2H), 7.50 – 7.44 (m, 1H), 7.43 – 7.32 (m, 4H), 7.30 (d,  $J = 7.6$  Hz, 1H), 7.21 (t,  $J = 7.6$  Hz, 1H), 7.01 (d,  $J = 7.4$  Hz, 1H), 6.57 (s, 1H), 6.08 – 5.91 (m, 1H), 5.48 (d,  $J = 10.1$  Hz, 1H), 5.30 (d,  $J = 16.9$  Hz, 1H), 4.41 (s, 1H), 3.88 – 3.73 (m, 2H), 2.61 (s, 3H), 2.50 (s, 3H), 0.79 (t,  $J = 7.1$  Hz, 3H);  $^{13}\text{C}$  NMR (100 MHz,  $\text{CDCl}_3$ )  $\delta$  166.9, 166.0, 165.9, 145.3, 135.8, 135.4, 134.7, 133.6, 131.9, 131.4, 131.1, 130.6, 130.1, 129.3, 128.5, 127.3, 126.9, 123.6, 123.2, 68.4, 62.6, 47.0, 21.8, 20.9, 13.1; IR (KBr): 2987, 1733, 1670, 1507, 1275, 1158, 936, 749  $\text{cm}^{-1}$ ; HRMS (ESI-TOF)  $m/z$ :  $[\text{M} - \text{H}]^-$  Calcd for  $\text{C}_{29}\text{H}_{27}\text{N}_2\text{O}_6\text{S}$  531.1590, found 531.1589.

**ethyl**

**3-benzamido-2-oxo-1-tosyl-6-(trifluoromethyl)-4-vinyl-1,2,3,4-tetrahydroquinoline-3-carboxylate (3la)**: Following the general procedure, under an argon atmosphere, acetone (4 mL) was added to the mixture of vinyl benzoxazinone **1l** (39.7 mg, 0.1 mmol), azlactone **2a** (35 mg, 0.15 mmol),  $[\text{Ir}(\text{COD})\text{Cl}]_2$  (3.4 mg, 0.005 mmol) and  $\text{TsOH}\cdot\text{H}_2\text{O}$  (4.0 mg, 0.01 mmol) Then, the reaction mixture was stirred at 25  $^\circ\text{C}$  for 1.5 hours. After the completion of the reaction, which was indicated by TLC, the reaction mixture was directly purified through preparative thin layer

chromatography (toluene/ethyl acetate = 20:1) to afford pure product **3la** (49.8 mg) in 85% yield as light yellow solid.

m.p. 89-90 °C; inseparable diastereomers (dr = 95:5); <sup>1</sup>H NMR (400 MHz, CDCl<sub>3</sub>) δ 8.07 (d, *J* = 8.4 Hz, 2H), 7.90 (d, *J* = 8.5 Hz, 1H), 7.66 (d, *J* = 8.4 Hz, 1H), 7.61 – 7.54 (m, 2H), 7.53 – 7.46 (m, 1H), 7.44 – 7.34 (m, 5H), 7.14 (s, 1H), 5.74 – 5.60 (m, 1H), 5.53 (dd, *J* = 10.0, 1.3 Hz, 1H), 5.42 – 5.31 (m, 1H), 5.09 (d, *J* = 9.6 Hz, 1H), 4.11 – 3.99 (m, 1H), 3.88 – 3.75 (m, 1H), 2.50 (s, 3H), 0.71 (t, *J* = 7.1 Hz, 3H); <sup>13</sup>C NMR (100 MHz, CDCl<sub>3</sub>) δ 165.9, 165.8, 164.9, 145.7, 138.0, 135.0, 133.2, 132.2, 130.2, 129.8, 129.6, 129.4, 128.7, 128.2 (*J* = 33 Hz), 127.0, 125.0, 124.7 (*J* = 4 Hz), 123.7 (*J* = 265 Hz), 123.4 (*J* = 4 Hz), 122.4, 68.2, 63.4, 45.2, 21.9, 13.2; IR (KBr): 2959, 1748, 1671, 1506, 1335, 1154, 935, 662 cm<sup>-1</sup>; HRMS (ESI-TOF) *m/z*: [M - H]<sup>-</sup> Calcd for C<sub>29</sub>H<sub>24</sub>F<sub>3</sub>N<sub>2</sub>O<sub>6</sub>S 585.1307, found 585.1321.

## ethyl

**3-benzamido-2-oxo-1-tosyl-7-(trifluoromethyl)-4-vinyl-1,2,3,4-tetrahydroquinoline-3-carboxylate (3ma)**: Following the general procedure, under an argon atmosphere, acetone (4 mL) was added to the mixture of vinyl benzoxazinanone **1m** (39.7 mg, 0.1 mmol), azlactone **2a** (35 mg, 0.15 mmol), [Ir(COD)Cl]<sub>2</sub> (3.4 mg, 0.005 mmol) and TsOH·H<sub>2</sub>O (4.0 mg, 0.01 mmol). Then, the reaction mixture was stirred at 25 °C for 1.5 hours. After the completion of the reaction, which was indicated by TLC, the reaction mixture was directly purified through preparative thin layer chromatography (toluene/ethyl acetate = 20:1) to afford pure product **3ma** (55.7 mg) in 95% yield as light yellow solid.

m.p. 131-132 °C; inseparable diastereomers (dr = 93:7); <sup>1</sup>H NMR (400 MHz, CDCl<sub>3</sub>) δ 8.07 (d, *J* = 8.4 Hz, 2H), 8.02 (s, 1H), 7.62 – 7.56 (m, 2H), 7.53 – 7.46 (m, 2H), 7.43 – 7.35 (m, 4H), 7.29 (d, *J* = 7.9 Hz, 1H), 7.12 (s, 1H), 5.75 – 5.61 (m, 1H), 5.50 (dd, *J* = 10.1, 1.3 Hz, 1H), 5.40 – 5.30 (m, 1H), 5.08 (d, *J* = 9.4 Hz, 1H), 4.05 – 3.93 (m, 1H), 3.88 – 3.77 (m, 1H), 2.49 (s, 3H), 0.70 (t, *J* = 7.1 Hz, 3H); <sup>13</sup>C NMR (100 MHz, CDCl<sub>3</sub>) δ 165.9, 165.8, 164.7, 145.6, 135.6, 135.0, 132.6 (*J* = 9 Hz), 133.1, 130.3, 130.0, 129.9, 129.4, 128.7, 128.6, 127.2, 127.0, 125.7 (*J* = 222 Hz), 122.6 (*J* = 37 Hz), 119.2 (*J* = 39 Hz), 68.2, 63.3, 45.3, 21.8, 13.0; IR (KBr): 2963, 1748, 1669, 1507, 1330, 1155, 942, 668 cm<sup>-1</sup>; HRMS (ESI-TOF) *m/z*: [M - H]<sup>-</sup> Calcd for C<sub>29</sub>H<sub>24</sub>F<sub>3</sub>N<sub>2</sub>O<sub>6</sub>S 585.1307, found 585.1313.

**ethyl**

**3-(2-methylbenzamido)-2-oxo-1-tosyl-4-vinyl-1,2,3,4-tetrahydroquinoline-3-carboxylate**

**(3ab):** Following the general procedure, under an argon atmosphere, acetone (4 mL) was added to the mixture of vinyl benzoxazinone **1a** (32.9 mg, 0.1 mmol), azlactone **2b** (37.1 mg, 0.15 mmol), [Ir(COD)Cl]<sub>2</sub> (3.4 mg, 0.005 mmol) and TsOH·H<sub>2</sub>O (4.0 mg, 0.02 mmol). Then, the reaction mixture was stirred at 25 °C for 1.5 hours. After the completion of the reaction, which was indicated by TLC, the reaction mixture was directly purified through preparative thin layer chromatography (toluene/ethyl acetate = 20:1) to afford pure product **3ab** (50.5 mg) in 95% yield as light yellow solid.

m.p. 82-83 °C; inseparable diastereomers (dr > 95:5); <sup>1</sup>H NMR (400 MHz, CDCl<sub>3</sub>) δ 8.06 (d, *J* = 8.0 Hz, 2H), 7.80 (d, *J* = 8.1 Hz, 1H), 7.46 – 7.26 (m, 5H), 7.24 – 7.09 (m, 4H), 6.71 (s, 1H), 5.85 – 5.69 (m, 1H), 5.57 (d, *J* = 9.9 Hz, 1H), 5.43 (d, *J* = 16.8 Hz, 1H), 5.08 (d, *J* = 8.6 Hz, 1H), 4.04 – 3.90 (m, 1H), 3.87 – 3.72 (m, 1H), 2.44 (s, 3H), 2.10 (s, 3H), 0.72 (t, *J* = 7.1 Hz, 3H); <sup>13</sup>C NMR (100 MHz, CDCl<sub>3</sub>) δ 163.7, 161.2, 160.3, 140.4, 132.2, 130.7, 130.3, 129.9, 126.4, 126.2, 125.5, 125.3, 124.3, 123.5, 122.8, 122.0, 121.3, 120.8, 118.8, 117.5, 63.4, 58.3, 40.5, 17.0, 14.7, 8.4; IR (KBr): 2978, 1742, 1671, 1476, 1363, 1159, 933, 749 cm<sup>-1</sup>; HRMS (ESI-TOF) *m/z*: [M - H]<sup>-</sup> Calcd for C<sub>29</sub>H<sub>27</sub>N<sub>2</sub>O<sub>6</sub>S 531.1590, found 531.1592.

**ethyl 3-(2-fluorobenzamido)-2-oxo-1-tosyl-4-vinyl-1,2,3,4-tetrahydroquinoline-3-carboxylate**

**(3ac):** Following the general procedure, under an argon atmosphere, acetone (4 mL) was added to the mixture of vinyl benzoxazinone **1a** (37.7 mg, 0.1 mmol), azlactone **2c** (37.7 mg, 0.15 mmol), [Ir(COD)Cl]<sub>2</sub> (3.4 mg, 0.005 mmol) and TsOH·H<sub>2</sub>O (4.0 mg, 0.02 mmol). Then, the reaction mixture was stirred at 25 °C for 1.5 hours. After the completion of the reaction, which was indicated by TLC, the reaction mixture was directly purified through preparative thin layer chromatography (toluene/ethyl acetate = 20:1) to afford pure product **3ac** (48.2 mg) in 90% yield as light yellow solid.

m.p. 71-72 °C; inseparable diastereomers (dr = 95:5); <sup>1</sup>H NMR (400 MHz, CDCl<sub>3</sub>) δ 8.07 (d, *J* = 8.3 Hz, 2H), 7.82 – 7.76 (m, 1H), 7.73 (d, *J* = 8.1 Hz, 1H), 7.70 – 7.64 (m, 1H), 7.49 – 7.42 (m, 1H), 7.40 – 7.35 (m, 3H), 7.25 – 7.13 (m, 3H), 7.12 – 7.04 (m, 1H), 5.92 – 5.71 (m, 1H), 5.48 (d, *J*

= 10.1 Hz, 1H), 5.34 (d,  $J = 17.0$  Hz, 1H), 4.88 (s, 1H), 4.00 – 3.90 (m, 1H), 3.85 – 3.75 (m, 1H), 2.47 (s, 3H), 0.72 (t,  $J = 7.1$  Hz, 3H);  $^{13}\text{C}$  NMR (100 MHz,  $\text{CDCl}_3$ )  $\delta$  165.8, 165.3, 161.9, 160.9 ( $J = 250$  Hz), 145.0, 135.8, 135.2, 133.8 ( $J = 10$  Hz), 131.9, 130.6, 129.5, 129.3, 128.2, 127.7, 126.1, 124.6, 123.7, 122.2, 120.0 ( $J = 10$  Hz), 116.1 ( $J = 20$  Hz), 68.7, 62.8, 45.8, 21.7, 13.2; IR (KBr): 2983, 1744, 1669, 1479, 1314, 1159, 1085, 755  $\text{cm}^{-1}$ ; HRMS (ESI-TOF)  $m/z$ :  $[\text{M} - \text{H}]^-$  Calcd for  $\text{C}_{28}\text{H}_{24}\text{FN}_2\text{O}_6\text{S}$  535.1339, found 535.1339.

**ethyl 3-(2-chlorobenzamido)-2-oxo-1-tosyl-4-vinyl-1,2,3,4-tetrahydroquinoline-3-carboxylate (3ad)**: Following the general procedure, under an argon atmosphere, acetone (4 mL) was added to the mixture of vinyl benzoxazinone **1a** (32.9 mg, 0.1 mmol), azlactone **2d** (40.1 mg, 0.15 mmol),  $[\text{Ir}(\text{COD})\text{Cl}]_2$  (3.4 mg, 0.005 mmol) and  $\text{TsOH}\cdot\text{H}_2\text{O}$  (4.0 mg, 0.02 mmol). Then, the reaction mixture was stirred at 25 °C for 1.5 hours. After the completion of the reaction, which was indicated by TLC, the reaction mixture was directly purified through preparative thin layer chromatography (toluene/ethyl acetate = 20:1) to afford pure product **3ad** (45.3 mg) in 82% yield as light yellow solid.

*m.p.* 77-78 °C; inseparable diastereomers (dr = 88:12);  $^1\text{H}$  NMR (400 MHz,  $\text{CDCl}_3$ )  $\delta$  8.07 (d,  $J = 8.3$  Hz, 2H), 7.76 (d,  $J = 8.1$  Hz, 1H), 7.45 (d,  $J = 7.6$  Hz, 1H), 7.41 – 7.27 (m, 7H), 7.24 – 7.19 (m, 1H), 7.16 (d,  $J = 7.6$  Hz, 1H), 5.81 – 5.67 (m, 1H), 5.53 (d,  $J = 10.0$  Hz, 1H), 5.41 (d,  $J = 16.8$  Hz, 1H), 5.02 (d,  $J = 9.5$  Hz, 1H), 4.02 – 3.91 (m, 1H), 3.85 – 3.74 (m, 1H), 2.46 (s, 3H), 0.72 (t,  $J = 7.1$  Hz, 3H);  $^{13}\text{C}$  NMR (100 MHz,  $\text{CDCl}_3$ )  $\delta$  165.8, 165.0, 164.7, 145.2, 135.5, 135.0, 133.3, 131.8, 131.2, 130.6, 130.5, 130.4, 129.9, 129.2, 128.2, 127.6, 126.9, 126.2, 126.1, 123.9, 122.2, 68.9, 63.0, 45.4, 21.7, 13.1; IR (KBr): 2984, 1733, 1683, 1558, 1362, 1160, 933, 747  $\text{cm}^{-1}$ ; HRMS (ESI-TOF)  $m/z$ :  $[\text{M} - \text{H}]^-$  Calcd for  $\text{C}_{28}\text{H}_{24}\text{ClN}_2\text{O}_6\text{S}$  551.1044, found 551.1035.

**ethyl 3-(2-bromobenzamido)-2-oxo-1-tosyl-4-vinyl-1,2,3,4-tetrahydroquinoline-3-carboxylate (3ae)**: Following the general procedure, under an argon atmosphere, acetone (4 mL) was added to the mixture of vinyl benzoxazinone **1a** (32.9 mg, 0.1 mmol), azlactone **2e** (46.8 mg, 0.15 mmol),  $[\text{Ir}(\text{COD})\text{Cl}]_2$  (3.4 mg, 0.005 mmol) and  $\text{TsOH}\cdot\text{H}_2\text{O}$  (4.0 mg, 0.02 mmol). Then, the reaction mixture was stirred at 25 °C for 1.5 hours. After the completion of the reaction, which was indicated by TLC, the reaction mixture was directly purified through preparative thin layer



chromatography (toluene/ethyl acetate = 20:1) to afford pure product **3ae** (56.6 mg) in 95% yield as light yellow solid.

m.p. 70-71 °C; inseparable diastereomers (dr = 95:5); <sup>1</sup>H NMR (400 MHz, CDCl<sub>3</sub>) δ 8.06 (d, *J* = 8.2 Hz, 2H), 7.77 (d, *J* = 8.1 Hz, 1H), 7.53 (d, *J* = 7.6 Hz, 1H), 7.40 – 7.34 (m, 4H), 7.32 – 7.27 (m, 1H), 7.25 – 7.19 (m, 2H), 7.16 (d, *J* = 7.5 Hz, 1H), 7.05 (s, 1H), 5.83 – 5.67 (m, 1H), 5.55 (d, *J* = 9.8 Hz, 1H), 5.45 (d, *J* = 16.8 Hz, 1H), 5.03 (d, *J* = 9.3 Hz, 1H), 4.01 – 3.89 (m, 1H), 3.85 – 3.74 (m, 1H), 2.44 (s, 3H), 0.72 (t, *J* = 7.1 Hz, 3H); <sup>13</sup>C NMR (100 MHz, CDCl<sub>3</sub>) δ 165.8, 165.7, 164.9, 145.2, 135.9, 135.6, 135.0, 133.6, 131.7, 130.7, 130.0, 129.8, 129.2, 128.2, 127.6, 127.3, 126.2, 126.1, 124.0, 122.2, 119.6, 68.7, 63.0, 45.4, 21.8, 13.2; IR (KBr): 2981, 1734, 1653, 1507, 1159, 1085, 933, 749 cm<sup>-1</sup>; HRMS (ESI-TOF) *m/z*: [M - H]<sup>-</sup> Calcd for C<sub>28</sub>H<sub>24</sub>BrN<sub>2</sub>O<sub>6</sub>S 595.0539, found 595.0540.

## ethyl

### **3-(3-methylbenzamido)-2-oxo-1-tosyl-4-vinyl-1,2,3,4-tetrahydroquinoline-3-carboxylate (3af):**

Following the general procedure, under an argon atmosphere, acetone (4 mL) was added to the mixture of vinyl benzoxazinone **1a** (32.9 mg, 0.1 mmol), azlactone **2f** (37.1 mg, 0.15 mmol), [Ir(COD)Cl]<sub>2</sub> (3.4 mg, 0.005 mmol) and TsOH·H<sub>2</sub>O (4.0 mg, 0.02 mmol). Then, the reaction mixture was stirred at 25 °C for 1.5 hours. After the completion of the reaction, which was indicated by TLC, the reaction mixture was directly purified through preparative thin layer chromatography (toluene/ethyl acetate = 20:1) to afford pure product **3af** (44.1 mg) in 83% yield as light yellow solid.

m.p. 102-103 °C; inseparable diastereomers (dr > 95:5); <sup>1</sup>H NMR (400 MHz, CDCl<sub>3</sub>) δ 8.08 (d, *J* = 8.3 Hz, 2H), 7.75 (d, *J* = 8.1 Hz, 1H), 7.45 – 7.33 (m, 5H), 7.31 – 7.27 (m, 2H), 7.24 – 7.19 (m, 1H), 7.15 (d, *J* = 7.6 Hz, 1H), 7.02 (s, 1H), 5.81 – 5.67 (m, 1H), 5.46 (d, *J* = 10.1 Hz, 1H), 5.32 (d, *J* = 16.8 Hz, 1H), 4.98 (d, *J* = 9.6 Hz, 1H), 4.02 – 3.90 (m, 1H), 3.87 – 3.74 (m, 1H), 2.49 (s, 3H), 2.36 (s, 3H), 0.71 (t, *J* = 7.1 Hz, 3H); <sup>13</sup>C NMR (100 MHz, CDCl<sub>3</sub>) δ 166.2, 166.0, 165.4, 145.0, 138.3, 135.6, 135.1, 133.3, 132.7, 130.9, 129.8, 129.2, 128.4, 127.8, 127.5, 126.2, 126.0, 123.9, 123.6, 122.2, 68.4, 62.9, 45.5, 21.8, 21.3, 13.2; IR (KBr): 2984, 1771, 1698, 1576, 1175, 1086, 935, 740 cm<sup>-1</sup>; HRMS (ESI-TOF) *m/z*: [M - H]<sup>-</sup> Calcd for C<sub>29</sub>H<sub>27</sub>N<sub>2</sub>O<sub>6</sub>S 531.1590, found 531.1597.

**ethyl 3-(3-chlorobenzamido)-2-oxo-1-tosyl-4-vinyl-1,2,3,4-tetrahydroquinoline-3-carboxylate**

**(3ag):** Following the general procedure, under an argon atmosphere, acetone (4 mL) was added to the mixture of vinyl benzoxazinone **1a** (32.9 mg, 0.1 mmol), azlactone **2g** (40.1 mg, 0.15 mmol), [Ir(COD)Cl]<sub>2</sub> (3.4 mg, 0.005 mmol) and TsOH·H<sub>2</sub>O (4.0 mg, 0.02 mmol). Then, the reaction mixture was stirred at 25 °C for 1.5 hours. After the completion of the reaction, which was indicated by TLC, the reaction mixture was directly purified through preparative thin layer chromatography (toluene/ethyl acetate = 20:1) to afford pure product **3ag** (52.4 mg) in 95% yield as light yellow solid.

m.p. 78-79 °C; inseparable diastereomers (dr = 95:5); <sup>1</sup>H NMR (400 MHz, CDCl<sub>3</sub>) δ 8.06 (d, *J* = 8.3 Hz, 2H), 7.74 (d, *J* = 8.1 Hz, 1H), 7.52 (d, *J* = 7.4 Hz, 1H), 7.48 – 7.42 (m, 2H), 7.37 (d, *J* = 8.1 Hz, 3H), 7.34 – 7.28 (m, 1H), 7.24 – 7.18 (m, 1H), 7.14 (d, *J* = 7.6 Hz, 1H), 7.03 (s, 1H), 5.81 – 5.66 (m, 1H), 5.47 (d, *J* = 10.4 Hz, 1H), 5.31 (d, *J* = 17.0 Hz, 1H), 4.95 (d, *J* = 9.6 Hz, 1H), 4.03 – 3.90 (m, 1H), 3.84 – 3.74 (m, 1H), 2.49 (s, 3H), 0.70 (t, *J* = 7.1 Hz, 3H); <sup>13</sup>C NMR (100 MHz, CDCl<sub>3</sub>) δ 166.0, 165.2, 164.6, 145.2, 135.5, 135.1, 135.0, 134.8, 132.0, 130.8, 129.8, 129.2, 128.2, 127.6, 126.2, 126.1, 124.8, 123.7, 122.2, 68.5, 63.1, 45.4, 21.8, 13.1; IR (KBr): 2982, 1733, 1674, 1558, 1368, 1161, 933, 750 cm<sup>-1</sup>; HRMS (ESI-TOF) *m/z*: [M - H]<sup>-</sup> Calcd for C<sub>28</sub>H<sub>24</sub>ClN<sub>2</sub>O<sub>6</sub>S 551.1044, found 551.1041.

**ethyl**

**3-(4-methylbenzamido)-2-oxo-1-tosyl-4-vinyl-1,2,3,4-tetrahydroquinoline-3-carboxylate**

**(3ah):** Following the general procedure, under an argon atmosphere, acetone (4 mL) was added to the mixture of vinyl benzoxazinone **1a** (32.9 mg, 0.1 mmol), azlactone **2h** (37.1 mg, 0.15 mmol), [Ir(COD)Cl]<sub>2</sub> (3.4 mg, 0.005 mmol) and TsOH·H<sub>2</sub>O (4.0 mg, 0.02 mmol). Then, the reaction mixture was stirred at 25 °C for 1.5 hours. After the completion of the reaction, which was indicated by TLC, the reaction mixture was directly purified through preparative thin layer chromatography (toluene/ethyl acetate = 20:1) to afford pure product **3ah** (45.2 mg) in 85% yield as light yellow solid.

m.p. 88-89 °C; inseparable diastereomers (dr = 95:5); <sup>1</sup>H NMR (400 MHz, CDCl<sub>3</sub>) δ 8.07 (d, *J* = 8.2 Hz, 2H), 7.74 (d, *J* = 8.2 Hz, 1H), 7.50 (d, *J* = 8.0 Hz, 2H), 7.39 – 7.34 (m, 3H), 7.23 – 7.13

(m, 4H), 6.99 (s, 1H), 5.84 – 5.67 (m, 1H), 5.45 (d,  $J = 10.1$  Hz, 1H), 5.31 (d,  $J = 16.9$  Hz, 1H), 4.97 (d,  $J = 9.4$  Hz, 1H), 4.01 – 3.90 (m, 1H), 3.86 – 3.74 (m, 1H), 2.47 (s, 3H), 2.37 (s, 3H), 0.71 (t,  $J = 7.1$  Hz, 3H);  $^{13}\text{C}$  NMR (100 MHz,  $\text{CDCl}_3$ )  $\delta$  161.4, 161.0, 160.7, 140.3, 137.7, 130.9, 130.4, 126.1, 125.8, 124.9, 124.5, 124.4, 123.6, 122.8, 122.3, 121.4, 121.3, 118.9, 117.4, 63.6, 58.1, 40.8, 17.0, 16.8, 8.4; IR (KBr): 2986, 1742, 1667, 1500, 1364, 1177, 803, 668  $\text{cm}^{-1}$ ; HRMS (ESI-TOF)  $m/z$ :  $[\text{M} - \text{H}]^-$  Calcd for  $\text{C}_{29}\text{H}_{27}\text{N}_2\text{O}_6\text{S}$  531.1590, found 531.1596.

### ethyl

#### **3-(4-methoxybenzamido)-2-oxo-1-tosyl-4-vinyl-1,2,3,4-tetrahydroquinoline-3-carboxylate**

**(3ai)**: Following the general procedure, under an argon atmosphere, acetone (4 mL) was added to the mixture of vinyl benzoxazinone **1a** (32.9 mg, 0.1 mmol), azlactone **2i** (39.5 mg, 0.15 mmol),  $[\text{Ir}(\text{COD})\text{Cl}]_2$  (3.4 mg, 0.005 mmol) and  $\text{TsOH}\cdot\text{H}_2\text{O}$  (4.0 mg, 0.02 mmol). Then, the reaction mixture was stirred at 25 °C for 1.5 hours. After the completion of the reaction, which was indicated by TLC, the reaction mixture was directly purified through preparative thin layer chromatography (toluene/ethyl acetate = 20:1) to afford pure product **3ai** (51 mg) in 93% yield as light yellow solid.

m.p. 87-88 °C; inseparable diastereomers (dr = 92:8);  $^1\text{H}$  NMR (400 MHz,  $\text{CDCl}_3$ )  $\delta$  8.07 (d,  $J = 8.3$  Hz, 2H), 7.73 (d,  $J = 8.1$  Hz, 1H), 7.58 (d,  $J = 8.7$  Hz, 2H), 7.38 – 7.34 (m, 3H), 7.23 – 7.18 (m, 1H), 7.14 (d,  $J = 7.6$  Hz, 1H), 6.94 (s, 1H), 6.87 (d,  $J = 8.7$  Hz, 2H), 5.85 – 5.66 (m, 1H), 5.45 (d,  $J = 10.1$  Hz, 1H), 5.31 (d,  $J = 16.8$  Hz, 1H), 4.95 (d,  $J = 8.8$  Hz, 1H), 4.01 – 3.89 (m, 1H), 3.85 – 3.77 (m, 4H), 2.47 (s, 3H), 0.70 (t,  $J = 7.1$  Hz, 3H);  $^{13}\text{C}$  NMR (100 MHz,  $\text{CDCl}_3$ )  $\delta$  166.2, 165.6, 165.3, 162.5, 145.0, 135.7, 135.2, 130.9, 129.6, 129.3, 128.9, 128.4, 127.5, 126.1, 126.0, 125.6, 123.6, 122.1, 113.7, 68.3, 62.8, 55.4, 45.6, 21.7, 13.2; IR (KBr): 2985, 1732, 1667, 1487, 1263, 1176, 933, 747  $\text{cm}^{-1}$ ; HRMS (ESI-TOF)  $m/z$ :  $[\text{M} - \text{H}]^-$  Calcd for  $\text{C}_{29}\text{H}_{27}\text{N}_2\text{O}_7\text{S}$  547.1539, found 547.1548.

#### **ethyl 3-(4-fluorobenzamido)-2-oxo-1-tosyl-4-vinyl-1,2,3,4-tetrahydroquinoline-3-carboxylate**

**(3aj)**: Following the general procedure, under an argon atmosphere, acetone (4 mL) was added to the mixture of vinyl benzoxazinone **1a** (32.9 mg, 0.1 mmol), azlactone **2j** (37.7 mg, 0.15 mmol),  $[\text{Ir}(\text{COD})\text{Cl}]_2$  (3.4 mg, 0.005 mmol) and  $\text{TsOH}\cdot\text{H}_2\text{O}$  (4.0 mg, 0.02 mmol). Then, the reaction

mixture was stirred at 25 °C for 1.5 hours. After the completion of the reaction, which was indicated by TLC, the reaction mixture was directly purified through preparative thin layer chromatography (toluene/ethyl acetate = 20:1) to afford pure product **3aj** (49.3 mg) in 92% yield as light yellow solid.

m.p. 79-80 °C; inseparable diastereomers (dr = 91:9); <sup>1</sup>H NMR (400 MHz, CDCl<sub>3</sub>) δ 8.07 (d, *J* = 8.2 Hz, 2H), 7.73 (d, *J* = 8.1 Hz, 1H), 7.67 – 7.57 (m, 2H), 7.36 (d, *J* = 7.9 Hz, 3H), 7.23 – 7.19 (m, 1H), 7.14 (d, *J* = 7.8 Hz, 1H), 7.09 – 7.03 (m, 2H), 6.98 (s, 1H), 5.85 – 5.70 (m, 1H), 5.47 (d, *J* = 10.0 Hz, 1H), 5.32 (d, *J* = 16.7 Hz, 1H), 4.94 (d, *J* = 9.1 Hz, 1H), 4.00 – 3.88 (m, 1H), 3.86 – 3.74 (m, 1H), 2.47 (s, 3H), 0.70 (t, *J* = 7.1 Hz, 3H); <sup>13</sup>C NMR (100 MHz, CDCl<sub>3</sub>) δ 166.1, 165.4, 164.8, 145.1, 135.7, 135.1, 130.9, 129.6, 129.5, 129.4 (*J* = 10 Hz), 129.3, 128.2, 127.6, 126.2, 126.1, 123.7, 122.2, 115.6 (*J* = 20 Hz), 68.4, 63.0, 45.5, 21.7, 13.2; IR (KBr): 2987, 1734, 1653, 1489, 1233, 1158, 850, 762 cm<sup>-1</sup>; HRMS (ESI-TOF) *m/z*: [M - H]<sup>-</sup> Calcd for C<sub>28</sub>H<sub>24</sub>FN<sub>2</sub>O<sub>6</sub>S 535.1339, found 535.1339.

**ethyl 3-(4-chlorobenzamido)-2-oxo-1-tosyl-4-vinyl-1,2,3,4-tetrahydroquinoline-3-carboxylate (3ak):** Following the general procedure, under an argon atmosphere, acetone (4 mL) was added to the mixture of vinyl benzoxazinone **1a** (32.9 mg, 0.1 mmol), azlactone **2k** (40.1 mg, 0.15 mmol), [Ir(COD)Cl]<sub>2</sub> (3.4 mg, 0.005 mmol) and TsOH·H<sub>2</sub>O (4.0 mg, 0.02 mmol). Then, the reaction mixture was stirred at 25 °C for 1.5 hours. After the completion of the reaction, which was indicated by TLC, the reaction mixture was directly purified through preparative thin layer chromatography (toluene/ethyl acetate = 20:1) to afford pure product **3ak** (48.6 mg) in 88% yield as light yellow solid.

m.p. 87-88 °C; inseparable diastereomers (dr = 95:5); <sup>1</sup>H NMR (400 MHz, CDCl<sub>3</sub>) δ 8.06 (d, *J* = 8.2 Hz, 2H), 7.73 (d, *J* = 8.1 Hz, 1H), 7.55 (d, *J* = 8.4 Hz, 2H), 7.36 (d, *J* = 8.1 Hz, 5H), 7.25 – 7.19 (m, 1H), 7.14 (d, *J* = 7.5 Hz, 1H), 6.99 (s, 1H), 5.83 – 5.67 (m, 1H), 5.46 (d, *J* = 10.1 Hz, 1H), 5.31 (d, *J* = 16.8 Hz, 1H), 4.94 (d, *J* = 9.4 Hz, 1H), 4.02 – 3.89 (m, 1H), 3.84 – 3.74 (m, 1H), 2.47 (s, 3H), 0.71 (t, *J* = 7.1 Hz, 3H); <sup>13</sup>C NMR (100 MHz, CDCl<sub>3</sub>) δ 166.1, 165.3, 164.8, 145.1, 138.2, 135.7, 135.1, 131.7, 130.8, 129.6, 129.3, 128.8, 128.4, 128.2, 127.6, 126.1, 123.7, 122.2, 68.4, 63.0, 45.5, 21.7, 13.1; IR (KBr): 2981, 1733, 1670, 1481, 1363, 1160, 933, 755 cm<sup>-1</sup>; HRMS (ESI-TOF) *m/z*: [M - H]<sup>-</sup> Calcd for C<sub>28</sub>H<sub>24</sub>ClN<sub>2</sub>O<sub>6</sub>S 551.1044, found 551.1055.

**ethyl 3-(4-bromobenzamido)-2-oxo-1-tosyl-4-vinyl-1,2,3,4-tetrahydroquinoline-3-carboxylate**

**(3al):** Following the general procedure, under an argon atmosphere, acetone (4 mL) was added to the mixture of vinyl benzoxazinanone **1a** (32.9 mg, 0.1 mmol), azlactone **2l** (46.8 mg, 0.15 mmol), [Ir(COD)Cl]<sub>2</sub> (3.4 mg, 0.005 mmol) and TsOH·H<sub>2</sub>O (4.0 mg, 0.02 mmol). Then, the reaction mixture was stirred at 25 °C for 1.5 hours. After the completion of the reaction, which was indicated by TLC, the reaction mixture was directly purified through preparative thin layer chromatography (toluene/ethyl acetate = 20:1) to afford pure product **3al** (50.7 mg) in 85% yield as light yellow solid.

m.p. 78-79 °C; inseparable diastereomers (dr = 95:5); <sup>1</sup>H NMR (400 MHz, CDCl<sub>3</sub>) δ 8.06 (d, *J* = 8.2 Hz, 2H), 7.73 (d, *J* = 8.1 Hz, 1H), 7.52 (d, *J* = 8.5 Hz, 2H), 7.47 (d, *J* = 8.5 Hz, 2H), 7.39 – 7.33 (m, 3H), 7.23 – 7.18 (m, 1H), 7.13 (d, *J* = 7.6 Hz, 1H), 7.00 (s, 1H), 5.83 – 5.67 (m, 1H), 5.46 (d, *J* = 10.1 Hz, 1H), 5.31 (d, *J* = 16.8 Hz, 1H), 4.94 (d, *J* = 9.4 Hz, 1H), 4.00 – 3.90 (m, 1H), 3.84 – 3.74 (m, 1H), 2.46 (s, 3H), 0.70 (t, *J* = 7.1 Hz, 3H); <sup>13</sup>C NMR (100 MHz, CDCl<sub>3</sub>) δ 166.0, 165.3, 164.9, 145.1, 135.7, 135.1, 132.2, 131.8, 130.8, 129.6, 129.3, 128.6, 128.2, 127.6, 126.7, 126.1, 123.7, 122.2, 68.4, 63.0, 45.5, 21.7, 13.1; IR (KBr):2981, 1733, 1670, 1479, 1367, 1160, 1010, 844 cm<sup>-1</sup>; HRMS (ESI-TOF) *m/z*: [M - H]<sup>-</sup> Calcd for C<sub>28</sub>H<sub>24</sub>BrN<sub>2</sub>O<sub>6</sub>S 595.0539, found 595.0532.

**ethyl**

**2-oxo-1-tosyl-3-(4-(trifluoromethyl)benzamido)-4-vinyl-1,2,3,4-tetrahydroquinoline-3-carboxylate (3am):**

Following the general procedure, under an argon atmosphere, acetone (4 mL) was added to the mixture of vinyl benzoxazinanone **1a** (32.9 mg, 0.1 mmol), azlactone **2m** (45.2 mg, 0.15 mmol), [Ir(COD)Cl]<sub>2</sub> (3.4 mg, 0.005 mmol) and TsOH·H<sub>2</sub>O (4.0 mg, 0.02 mmol). Then, the reaction mixture was stirred at 25 °C for 1.5 hours. After the completion of the reaction, which was indicated by TLC, the reaction mixture was directly purified through preparative thin layer chromatography (toluene/ethyl acetate = 20:1) to afford pure product **3am** (48.6 mg) in 83% yield as light yellow solid.

m.p. 104-105 °C; inseparable diastereomers (dr = 94:6); <sup>1</sup>H NMR (400 MHz, CDCl<sub>3</sub>) δ 8.07 (d, *J* = 8.3 Hz, 2H), 7.76 – 7.70 (m, 3H), 7.66 (d, *J* = 8.3 Hz, 2H), 7.41 – 7.35 (m, 3H), 7.25 – 7.20 (m,

1H), 7.14 (d,  $J = 7.6$  Hz, 1H), 7.08 (s, 1H), 5.83 – 5.68 (m, 1H), 5.47 (d,  $J = 10.6$  Hz, 1H), 5.33 (d,  $J = 16.8$  Hz, 1H), 4.96 (d,  $J = 9.7$  Hz, 1H), 4.00 – 3.91 (m, 1H), 3.86 – 3.76 (m, 1H), 2.47 (s, 3H), 0.71 (t,  $J = 7.1$  Hz, 3H);  $^{13}\text{C}$  NMR (100 MHz,  $\text{CDCl}_3$ )  $\delta$  166.0, 165.1, 164.6, 145.2, 136.6, 135.4 ( $J = 60$  Hz), 133.6 ( $J = 40$  Hz), 130.8, 129.6, 129.3, 128.1, 127.7, 127.5, 126.2, 125.6 ( $J = 3$  Hz), 123.7, 122.2, 68.5, 63.1, 45.4, 21.7, 13.1; IR (KBr): 2984, 1734, 1670, 1522, 1325, 1162, 933, 856  $\text{cm}^{-1}$ ; HRMS (ESI-TOF)  $m/z$ :  $[\text{M} - \text{H}]^-$  Calcd for  $\text{C}_{29}\text{H}_{24}\text{F}_3\text{N}_2\text{O}_6\text{S}$  585.1307, found 585.1325.

## 5. Procedure for the synthesis of chiral 3 and characterization data

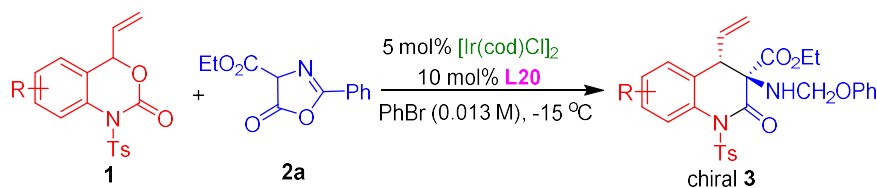

Under an argon atmosphere, bromobenzene (4 mL) was added to the mixture of vinyl benzoxazinone **1** (0.1 mmol), azlactone **2a** (0.05 mmol), [Ir(COD)Cl]<sub>2</sub> (0.0025 mmol) and **L20** (0.005 mmol). Then, the reaction mixture was stirred at -15 °C for 1.5 hours. After the completion of the reaction, which was indicated by TLC, the reaction mixture was directly purified through preparative thin layer chromatography to afford pure product **chiral 3**.

**ethyl (3R,4S)-3-benzamido-2-oxo-1-tosyl-4-vinyl-1,2,3,4-tetrahydroquinoline-3-carboxylate (chiral 3aa):** Following the general procedure, under an argon atmosphere, bromobenzene (4 mL) was added to the mixture of vinyl benzoxazinone **1a** (32.9 mg, 0.1 mmol), azlactone **2a** (11.2 mg, 0.05 mmol), [Ir(COD)Cl]<sub>2</sub> (1.7 mg, 0.0025 mmol) and **L20** (3.0 mg, 0.005 mmol). Then, the reaction mixture was stirred at -15 °C for 1.5 hours. After the completion of the reaction, which was indicated by TLC, the reaction mixture was directly purified through preparative thin layer chromatography (toluene/ethyl acetate = 15:1) to afford pure product chiral **3aa** (20.7 mg) in 80% yield as light yellow solid.

m.p. 75-77 °C; [ $\alpha$ ]<sub>D</sub><sup>20</sup> = +11.1 (c 0.38, Acetone); inseparable diastereomers (dr = 84:16); <sup>1</sup>H NMR (400 MHz, CDCl<sub>3</sub>)  $\delta$  8.06 (d, *J* = 8.3 Hz, 2H), 7.74 (d, *J* = 8.1 Hz, 1H), 7.60 (d, *J* = 7.4 Hz, 2H), 7.51 – 7.45 (m, 1H), 7.40 – 7.34 (m, 5H), 7.20 (d, *J* = 7.5 Hz, 1H), 7.14 (d, *J* = 7.6 Hz, 1H), 7.02 (s, 1H), 5.82 – 5.69 (m, 1H), 5.47 (d, *J* = 10.1 Hz, 1H), 5.33 (d, *J* = 16.9 Hz, 1H), 4.97 (d, *J* = 9.5 Hz, 1H), 4.01 – 3.91 (m, 1H), 3.86 – 3.76 (m, 1H), 2.47 (s, 3H), 0.71 (t, *J* = 7.1 Hz, 3H); <sup>13</sup>C NMR (100 MHz, CDCl<sub>3</sub>)  $\delta$  166.1, 165.9, 165.4, 145.1, 135.6, 135.1, 133.4, 131.9, 130.9, 129.7, 129.2, 128.5, 128.3, 127.6, 127.0, 126.2, 126.1, 123.7, 122.2, 68.3, 62.9, 45.5, 21.8, 13.2; IR (KBr): 2986, 1733, 1669, 1506, 1265, 1159, 933, 740 cm<sup>-1</sup>; HRMS (ESI-TOF) *m/z*: [M - H]<sup>-</sup> Calcd for C<sub>28</sub>H<sub>26</sub>N<sub>2</sub>O<sub>6</sub>S 517.1434, found 517.1422; Enantiomeric ratio: 93:7, determined by HPLC (Daicel Chiralpak AS-H, hexane/ isopropanol = 90/ 10, flow rate 1.0 mL/min, T = 30 °C, 254 nm): *t*<sub>R</sub> = 41.560 min (minor), *t*<sub>R</sub> = 20.360 min (major).

## ethyl

**(3R,4S)-3-benzamido-6-methoxy-2-oxo-1-tosyl-4-vinyl-1,2,3,4-tetrahydroquinoline-3-carboxylate (chiral 3ea):** Following the general procedure, under an argon atmosphere, bromobenzene (4 mL) was added to the mixture of vinyl benzoxazinanone **1e** (35.9 mg, 0.1 mmol), azlactone **2a** (11.2 mg, 0.05 mmol), [Ir(COD)Cl]<sub>2</sub> (1.7 mg, 0.0025 mmol) and **L20** (3.0 mg, 0.005 mmol). Then, the reaction mixture was stirred at -15 °C for 1.5 hours. After the completion of the reaction, which was indicated by TLC, the reaction mixture was directly purified through preparative thin layer chromatography (toluene/ethyl acetate = 15:1) to afford pure product chiral **3ea** (18.2 mg) in 66% yield as light yellow solid.

m.p. 77-79 °C; [ $\alpha$ ]<sub>D</sub><sup>20</sup> = +9.9 (c 0.36, Acetone); inseparable diastereomers (dr = 83:17); <sup>1</sup>H NMR (400 MHz, CDCl<sub>3</sub>)  $\delta$  8.04 (d, *J* = 8.3 Hz, 2H), 7.65 (d, *J* = 8.9 Hz, 1H), 7.60 (d, *J* = 7.3 Hz, 2H), 7.51 – 7.46 (m, 1H), 7.42 – 7.33 (m, 4H), 7.00 (s, 1H), 6.91 – 6.86 (m, 1H), 6.69 (d, *J* = 1.9 Hz, 1H), 5.82 – 5.68 (m, 1H), 5.46 (d, *J* = 10.1 Hz, 1H), 5.31 (d, *J* = 16.8 Hz, 1H), 4.89 (d, *J* = 8.9 Hz, 1H), 4.02 – 3.94 (m, 1H), 3.89 – 3.81 (m, 1H), 3.80 (s, 3H), 2.48 (s, 3H), 0.79 (t, *J* = 7.1 Hz, 3H); <sup>13</sup>C NMR (100 MHz, CDCl<sub>3</sub>)  $\delta$  166.1, 165.9, 165.3, 157.7, 145.0, 135.6, 133.4, 131.9, 130.8, 130.0, 129.6, 129.2, 128.5, 128.2, 127.0, 123.7, 123.6, 112.5, 111.8, 68.3, 62.9, 55.6, 45.7, 21.7, 13.3; IR (KBr): 2982, 1733, 1670, 1489, 1219, 1152, 936, 710 cm<sup>-1</sup>; HRMS (ESI-TOF) *m/z*: [M - H]<sup>-</sup> Calcd for C<sub>29</sub>H<sub>28</sub>N<sub>2</sub>O<sub>7</sub>S 547.1539, found 547.1536; Enantiomeric excess: 86:14, determined by HPLC (Daicel Chiralpak IC, hexane/ isopropanol = 70/ 30, flow rate 1.0 mL/min, T = 30 °C, 254 nm): *t*<sub>R</sub> = 36.187 min (minor), *t*<sub>R</sub> = 25.073 min (major).

## ethyl

**(3R,4S)-3-benzamido-6-chloro-2-oxo-1-tosyl-4-vinyl-1,2,3,4-tetrahydroquinoline-3-carboxylate (chiral 3ga):** Following the general procedure, under an argon atmosphere, bromobenzene (4 mL) was added to the mixture of vinyl benzoxazinanone **1g** (36.3 mg, 0.1 mmol), azlactone **2a** (11.2 mg, 0.05 mmol), [Ir(COD)Cl]<sub>2</sub> (1.7 mg, 0.0025 mmol) and **L20** (3.0 mg, 0.005 mmol). Then, the reaction mixture was stirred at -15 °C for 1.5 hours. After the completion of the reaction, which was indicated by TLC, the reaction mixture was directly purified through preparative thin layer chromatography (toluene/ethyl acetate = 15:1) to afford pure product chiral **3ga** (19.2mg) in 70% yield as light yellow solid.



m.p. 74-76 °C;  $[\alpha]_D^{20} = +14.1$  (c 0.38, Acetone); inseparable diastereomers (dr = 83:17);  $^1\text{H}$  NMR (400 MHz,  $\text{CDCl}_3$ )  $\delta$  8.05 (d,  $J = 8.3$  Hz, 2H), 7.70 (d,  $J = 8.7$  Hz, 1H), 7.57 (d,  $J = 7.3$  Hz, 2H), 7.53 – 7.47 (m, 1H), 7.43 – 7.33 (m, 5H), 7.13 (s, 1H), 7.08 (s, 1H), 5.73 – 5.61 (m, 1H), 5.49 (d,  $J = 10.0$  Hz, 1H), 5.33 (d,  $J = 16.7$  Hz, 1H), 4.99 (d,  $J = 9.6$  Hz, 1H), 4.07 – 4.00 (m, 1H), 3.91 – 3.82 (m, 1H), 2.49 (s, 3H), 0.79 (t,  $J = 7.1$  Hz, 3H);  $^{13}\text{C}$  NMR (100 MHz,  $\text{CDCl}_3$ )  $\delta$  165.9, 165.8, 164.9, 145.4, 135.1, 133.6, 133.2, 132.0, 131.7, 130.5, 130.1, 129.9, 129.3, 128.5, 127.4, 127.0, 126.3, 124.5, 123.4, 68.1, 63.3, 45.2, 21.8, 13.3; IR (KBr): 3124, 1734, 1670, 1479, 1399, 1154, 935, 810  $\text{cm}^{-1}$ ; HRMS (ESI-TOF)  $m/z$ :  $[\text{M} - \text{H}]^-$  Calcd for  $\text{C}_{28}\text{H}_{25}\text{ClN}_2\text{O}_6\text{S}$  551.1044, found 551.1040; Enantiomeric excess: 89:11, determined by HPLC (Daicel Chiralpak AD-H, hexane/isopropanol = 70/30, flow rate 1.0 mL/min,  $T = 30$  °C, 254 nm):  $t_R = 11.963$  min (minor),  $t_R = 17.737$  min (major).

## ethyl

**(3*R*,4*S*)-3-benzamido-7-fluoro-2-oxo-1-tosyl-4-vinyl-1,2,3,4-tetrahydroquinoline-3-carboxylate (chiral **3ia**):** Following the general procedure, under an argon atmosphere, bromobenzene (4 mL) was added to the mixture of vinyl benzoxazinone **1i** (34.7 mg, 0.1 mmol), azlactone **2a** (11.2 mg, 0.05 mmol),  $[\text{Ir}(\text{COD})\text{Cl}]_2$  (1.7 mg, 0.0025 mmol) and **L20** (3.0 mg, 0.005 mmol). Then, the reaction mixture was stirred at -15 °C for 1.5 hours. After the completion of the reaction, which was indicated by TLC, the reaction mixture was directly purified through preparative thin layer chromatography (toluene/ethyl acetate = 15:1) to afford pure product chiral **3ia** (18.7 mg) in 70% yield as light yellow solid. m.p. 127-129 °C;  $[\alpha]_D^{20} = +10.7$  (c 0.37, Acetone); inseparable diastereomers (dr = 74:26);  $^1\text{H}$  NMR (400 MHz,  $\text{CDCl}_3$ )  $\delta$  8.07 (d,  $J = 8.3$  Hz, 2H), 7.60 (d,  $J = 7.5$  Hz, 2H), 7.57 – 7.52 (m, 1H), 7.49 (d,  $J = 7.2$  Hz, 1H), 7.42 – 7.36 (m, 4H), 7.13 – 7.07 (m, 1H), 7.05 (s, 1H), 6.97 – 6.90 (m, 1H), 5.78 – 5.63 (m, 1H), 5.47 (d,  $J = 10.0$  Hz, 1H), 5.32 (d,  $J = 16.8$  Hz, 1H), 4.92 (d,  $J = 9.5$  Hz, 1H), 4.07 – 3.96 (m, 1H), 3.89 – 3.80 (m, 1H), 2.48 (s, 3H), 0.79 (t,  $J = 7.1$  Hz, 3H);  $^{13}\text{C}$  NMR (100 MHz,  $\text{CDCl}_3$ )  $\delta$  166.0, 165.8, 165.1, 145.4, 136.1, 135.3, 133.2, 132.0, 130.6, 129.7, 129.3, 128.5, 127.0, 124.0, 112.6 ( $J = 20$  Hz), 110.2 ( $J = 30$  Hz), 68.2, 63.1, 45.0, 21.8, 13.3; IR (KBr): 2988, 1748, 1670, 1507, 1275, 1177, 847, 750  $\text{cm}^{-1}$ ; HRMS (ESI-TOF)  $m/z$ :  $[\text{M} - \text{H}]^-$  Calcd for  $\text{C}_{28}\text{H}_{25}\text{FN}_2\text{O}_6\text{S}$  535.1339, found 535.1351; Enantiomeric

excess: 88:12, determined by HPLC (Daicel Chiralpak OD-H, hexane/ isopropanol = 95/ 5, flow rate 1.0 mL/min, T = 30 °C, 254 nm):  $t_R = 19.283$  min (minor),  $t_R = 27.760$  min (major).

## 6. Procedure for the synthesis of product 5 and characterization data

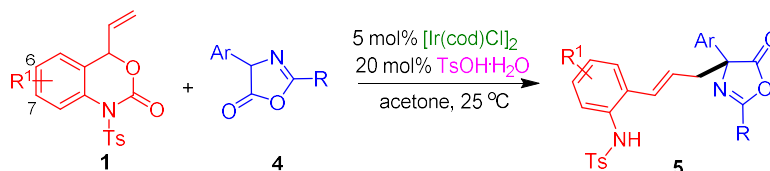

Under an argon atmosphere, acetone (4 mL) was added to the mixture of vinyl benzoxazinones **1** (0.1 mmol), azlactones **4** (0.15 mmol),  $[\text{Ir}(\text{COD})\text{Cl}]_2$  (3.4 mg, 0.005 mmol) and  $\text{TsOH}\cdot\text{H}_2\text{O}$  (4.0 mg, 0.02 mmol). Then, the reaction mixture was stirred at 25 °C for 1.5 hours. After the completion of the reaction, which was indicated by TLC, the reaction mixture was directly purified through preparative thin layer chromatography to afford pure products **5**.

**(E)-4-methyl-N-(2-(3-(5-oxo-2,4-diphenyl-4,5-dihydrooxazol-4-yl)prop-1-en-1-yl)phenyl)benzenesulfonamide (5aa)** :Following the general procedure, under an argon atmosphere, acetone (4 mL) was added to the mixture of vinyl benzoxazinone **1a** (32.9 mg, 0.1 mmol), azlactone **4a** (35.6 mg, 0.15 mmol),  $[\text{Ir}(\text{COD})\text{Cl}]_2$  (3.4 mg, 0.005 mmol) and  $\text{TsOH}\cdot\text{H}_2\text{O}$  (4.0 mg, 0.02 mmol). Then, the reaction mixture was stirred at 25 °C for 1.5 hours. After the completion of the reaction, which was indicated by TLC, the reaction mixture was directly purified through preparative thin layer chromatography (toluene/ethyl acetate = 20:1) to afford pure product **5aa** (48 mg) in 92% yield as light yellow solid.

m.p. 60-61 °C ; *E/Z* = 83:17;  $^1\text{H}$  NMR (400 MHz,  $\text{CDCl}_3$ )  $\delta$  8.45 – 8.35 (m, 2H), 7.67 – 7.61 (m, 2H), 7.61 – 7.53 (m, 3H), 7.53 – 7.38 (m, 4H), 7.34 (s, 1H), 7.28 – 7.25 (m, 1H), 7.22 (d,  $J = 6.2$  Hz, 2H), 7.19 – 7.12 (m, 1H), 7.12 – 7.02 (m, 2H), 6.26 (s, 1H), 6.09 (d,  $J = 15.7$  Hz, 1H), 5.77 – 5.64 (m, 1H), 3.07 – 2.88 (m, 2H), 2.39 (s, 3H);  $^{13}\text{C}$  NMR (100 MHz,  $\text{CDCl}_3$ )  $\delta$  164.0, 156.2, 143.9, 138.2, 136.6, 133.1, 132.7, 131.6, 131.2, 129.6, 129.2, 128.9, 128.8, 128.7, 128.6, 128.3, 127.3, 127.2, 126.3, 126.0, 125.7, 124.7, 106.0, 45.3, 21.6; IR (KBr): 2923, 1772, 1338, 1161, 963, 750  $\text{cm}^{-1}$ ; HRMS (ESI-TOF)  $m/z$ :  $[\text{M} + \text{H}]^+$  Calcd for  $\text{C}_{31}\text{H}_{27}\text{N}_2\text{O}_4\text{S}$  523.1692, found 523.1693.

**(E)-N-(2-(3-(2-(2-chlorophenyl)-5-oxo-4-phenyl-4,5-dihydrooxazol-4-yl)prop-1-en-1-yl)phenyl)-4-methylbenzenesulfonamide (5ab):** Following the general procedure, under an argon atmosphere, acetone (4 mL) was added to the mixture of vinyl benzoxazinanone **1a** (32.9 mg, 0.1 mmol), azlactone **4b** (40.7mg, 0.15 mmol), [Ir(COD)Cl]<sub>2</sub> (3.4 mg, 0.005 mmol) and TsOH·H<sub>2</sub>O (4.0 mg, 0.02 mmol). Then, the reaction mixture was stirred at 25 °C for 1.5 hours. After the completion of the reaction, which was indicated by TLC, the reaction mixture was directly purified through preparative thin layer chromatography (toluene/ethyl acetate = 20:1) to afford pure product **5ab** (52.8 mg) in 95% yield as light yellow solid.

m.p. 70-71 °C; *E/Z* = 95:5; <sup>1</sup>H NMR (400 MHz, CDCl<sub>3</sub>) δ 8.50 – 8.39 (m, 2H), 7.67 (dd, *J* = 7.8, 1.7 Hz, 1H), 7.63 – 7.46 (m, 6H), 7.40 – 7.34 (m, 1H), 7.33 – 7.27 (m, 2H), 7.22 (d, *J* = 8.0 Hz, 2H), 7.19 – 7.14 (m, 1H), 7.08 – 7.00 (m, 2H), 6.13 (s, 1H), 6.03 (d, *J* = 15.7 Hz, 1H), 5.75 – 5.61 (m, 1H), 3.36 – 3.13 (m, 2H), 2.39 (s, 3H); <sup>13</sup>C NMR (100 MHz, CDCl<sub>3</sub>) δ 163.7, 156.6, 143.9, 136.6, 135.2, 133.1, 132.9, 132.3, 132.0, 131.7, 131.3, 130.7, 129.7, 129.2, 128.9, 128.6, 128.2, 127.3, 127.1, 127.0, 126.4, 125.9, 125.0, 105.3, 41.5, 21.6; IR (KBr): 2963, 1778, 1337, 1162, 961, 749 cm<sup>-1</sup>; HRMS (ESI-TOF) *m/z*: [M + H]<sup>+</sup> Calcd for C<sub>31</sub>H<sub>26</sub>ClN<sub>2</sub>O<sub>4</sub>S 557.1302, found 557.1320.

**(E)-N-(2-(3-(2-(3-chlorophenyl)-5-oxo-4-phenyl-4,5-dihydrooxazol-4-yl)prop-1-en-1-yl)phenyl)-4-methylbenzenesulfonamide (5ac):** Following the general procedure, under an argon atmosphere, acetone (4 mL) was added to the mixture of vinyl benzoxazinanone **1a** (32.9 mg, 0.1 mmol), azlactone **4c** (40.7mg, 0.15 mmol), [Ir(COD)Cl]<sub>2</sub> (3.4 mg, 0.005 mmol) and TsOH·H<sub>2</sub>O (4.0 mg, 0.02 mmol). Then, the reaction mixture was stirred at 25 °C for 1.5 hours. After the completion of the reaction, which was indicated by TLC, the reaction mixture was directly purified through preparative thin layer chromatography (toluene/ethyl acetate = 20:1) to afford pure product **5ac** (28.1 mg) in 51% yield as light yellow solid.

m.p. 63-64 °C; *E/Z* = 91:9; <sup>1</sup>H NMR (400 MHz, CDCl<sub>3</sub>) δ 8.48 – 8.33 (m, 2H), 7.68 – 7.63 (m, 1H), 7.62 – 7.44 (m, 6H), 7.42 – 7.35 (m, 2H), 7.25 – 7.19 (m, 3H), 7.19 – 7.03 (m, 3H), 6.28 (s, 1H), 6.18 (d, *J* = 15.7 Hz, 1H), 5.75 – 5.61 (m, 1H), 3.08 – 2.87 (m, 2H), 2.39 (s, 3H); <sup>13</sup>C NMR (100 MHz, CDCl<sub>3</sub>) δ 163.7, 156.5, 143.9, 140.2, 136.6, 134.7, 133.1, 133.0, 131.7, 130.0, 129.7, 129.3, 128.9, 128.8, 128.7, 128.1, 127.3, 127.2, 126.4, 124.9, 124.8, 124.2, 105.1, 45.1, 21.6; IR

(KBr): 2922, 1779, 1337, 1160, 965, 751  $\text{cm}^{-1}$ ; HRMS (ESI-TOF)  $m/z$ :  $[\text{M} + \text{H}]^+$  Calcd for  $\text{C}_{31}\text{H}_{26}\text{ClN}_2\text{O}_4\text{S}$  557.1302, found 557.1318.

**(E)-4-methyl-N-(2-(3-(5-oxo-4-phenyl-2-(p-tolyl)-4,5-dihydrooxazol-4-yl)prop-1-en-1-yl)phenyl)benzenesulfonamide (5ad)**: Following the general procedure, under an argon atmosphere, acetone (4 mL) was added to the mixture of vinyl benzoxazinanone **1a** (32.9 mg, 0.1 mmol), azlactone **4d** (37.7mg, 0.15 mmol),  $[\text{Ir}(\text{COD})\text{Cl}]_2$  (3.4 mg, 0.005 mmol) and  $\text{TsOH}\cdot\text{H}_2\text{O}$  (4.0 mg, 0.02 mmol). Then, the reaction mixture was stirred at 25 °C for 1.5 hours. After the completion of the reaction, which was indicated by TLC, the reaction mixture was directly purified through preparative thin layer chromatography (toluene/ethyl acetate = 20:1) to afford pure product **5ad** (46.6 mg) in 87% yield as light yellow solid.

m.p. 68-69 °C;  $E/Z$  = 91:9;  $^1\text{H}$  NMR (400 MHz,  $\text{CDCl}_3$ )  $\delta$  8.45 – 8.35 (m, 2H), 7.60 – 7.54 (m, 3H), 7.53 – 7.45 (m, 4H), 7.31 – 7.26 (m, 2H), 7.25 (s, 1H), 7.21 (d,  $J$  = 8.0 Hz, 2H), 7.18 – 7.14 (m, 1H), 7.11 – 7.03 (m, 2H), 6.25 (s, 1H), 6.04 (d,  $J$  = 15.7 Hz, 1H), 5.76 – 5.65 (m, 1H), 3.03 – 2.87 (m, 2H), 2.40 (s, 3H), 2.38 (s, 3H);  $^{13}\text{C}$  NMR (100 MHz,  $\text{CDCl}_3$ )  $\delta$  164.0, 156.1, 143.9, 139.2, 136.6, 135.3, 133.1, 132.7, 131.6, 131.1, 129.6, 129.3, 128.8, 128.7, 128.6, 128.4, 127.3, 127.2, 126.3, 126.0, 125.9, 124.8, 106.1, 45.2, 21.6, 21.2; IR (KBr): 2925, 1774, 1338, 1162, 967, 753  $\text{cm}^{-1}$ ; HRMS (ESI-TOF)  $m/z$ :  $[\text{M} + \text{H}]^+$  Calcd for  $\text{C}_{32}\text{H}_{29}\text{N}_2\text{O}_4\text{S}$  537.1848, found 537.1835.

**(E)-N-(2-(3-(4-(3-chlorophenyl)-5-oxo-2-phenyl-4,5-dihydrooxazol-4-yl)prop-1-en-1-yl)phenyl)-4-methylbenzenesulfonamide (5ae)**: Following the general procedure, under an argon atmosphere, acetone (4 mL) was added to the mixture of vinyl benzoxazinanone **1a** (32.9 mg, 0.1 mmol), azlactone **4e** (40.7mg, 0.15 mmol),  $[\text{Ir}(\text{COD})\text{Cl}]_2$  (3.4 mg, 0.005 mmol) and  $\text{TsOH}\cdot\text{H}_2\text{O}$  (4.0 mg, 0.02 mmol). Then, the reaction mixture was stirred at 25 °C for 1.5 hours. After the completion of the reaction, which was indicated by TLC, the reaction mixture was directly purified through preparative thin layer chromatography (toluene/ethyl acetate = 20:1) to afford pure product **5ae** (52.8 mg) in 95% yield as light yellow solid.

m.p. 65-66 °C;  $E/Z$  = 83:17;  $^1\text{H}$  NMR (400 MHz,  $\text{CDCl}_3$ )  $\delta$  8.43 – 8.37 (m, 1H), 8.36 – 8.29 (m, 1H), 7.67 – 7.61 (m, 2H), 7.61 – 7.56 (m, 2H), 7.55 – 7.50 (m, 1H), 7.49 – 7.39 (m, 4H), 7.26 – 7.18 (m, 3H), 7.18 – 7.12 (m, 1H), 7.12 – 7.03 (m, 2H), 6.36 (s, 1H), 6.15 (d,  $J$  = 15.7 Hz, 1H),

5.77 – 5.62 (m, 1H), 3.08 – 2.89 (m, 2H), 2.39 (s, 3H); <sup>13</sup>C NMR (100 MHz, CDCl<sub>3</sub>) δ 163.5, 155.2, 143.9, 137.9, 136.6, 135.0, 133.1, 132.8, 131.6, 131.4, 130.2, 129.9, 129.6, 129.3, 128.7, 128.6, 127.2, 126.9, 126.4, 126.0, 125.2, 124.8, 106.2, 45.2, 21.6; IR (KBr): 2923, 1777, 1333, 1162, 967, 756 cm<sup>-1</sup>; HRMS (ESI-TOF) m/z: [M + H]<sup>+</sup> Calcd for C<sub>31</sub>H<sub>26</sub>ClN<sub>2</sub>O<sub>4</sub>S 5557.1302, found 557.1313.

**(E)-N-(2-(3-(4-(4-fluorophenyl)-5-oxo-2-phenyl-4,5-dihydrooxazol-4-yl)prop-1-en-1-yl)phenyl)-4-methylbenzenesulfonamide (5af):** Following the general procedure, under an argon atmosphere, acetone (4 mL) was added to the mixture of vinyl benzoxazinone **1a** (32.9 mg, 0.1 mmol), azlactone **4f** (38.3mg, 0.15 mmol), [Ir(COD)Cl]<sub>2</sub> (3.4 mg, 0.005 mmol) and TsOH·H<sub>2</sub>O (4.0 mg, 0.02 mmol). Then, the reaction mixture was stirred at 25 °C for 1.5 hours. After the completion of the reaction, which was indicated by TLC, the reaction mixture was directly purified through preparative thin layer chromatography (toluene/ethyl acetate = 20:1) to afford pure product **5af** (44.8 mg) in 83% yield as light yellow solid.

m.p. 60-61 °C; *E/Z* = 83:17; <sup>1</sup>H NMR (400 MHz, CDCl<sub>3</sub>) δ 8.55 – 8.37 (m, 2H), 7.66 – 7.55 (m, 4H), 7.49 – 7.39 (m, 3H), 7.26 – 7.13 (m, 6H), 7.11 – 7.03 (m, 2H), 6.30 (s, 1H), 6.13 (d, *J* = 15.8 Hz, 1H), 5.76 – 5.64 (m, 1H), 3.04 – 2.92 (m, 2H), 2.39 (s, 3H); <sup>13</sup>C NMR (101 MHz, CDCl<sub>3</sub>) δ 165.6(*J* = 253 Hz), 163.9, 155.1, 143.9, 138.2, 136.6, 133.1, 131.6, 131.3, 131.2, 129.6, 129.2, 128.7, 128.6, 127.3, 127.2, 126.3, 126.0, 125.5, 124.7, 124.6, 116.1(*J* = 21.8 Hz), 45.3, 21.6; IR (KBr): 2923, 1774, 1509, 1333, 1157, 964, 753 cm<sup>-1</sup>; HRMS (ESI-TOF) m/z: [M + H]<sup>+</sup> Calcd for C<sub>31</sub>H<sub>26</sub>FN<sub>2</sub>O<sub>4</sub>S 541.1597, found 541.1599.

**(E)-4-methyl-N-(4-methyl-2-(3-(5-oxo-2,4-diphenyl-4,5-dihydrooxazol-4-yl)prop-1-en-1-yl)phenyl)benzenesulfonamide (5da) :** Following the general procedure, under an argon atmosphere, acetone (4 mL) was added to the mixture of vinyl benzoxazinone **1d**(34.3 mg, 0.1 mmol), azlactone **4a** (35.6 mg, 0.15 mmol), [Ir(COD)Cl]<sub>2</sub> (3.4 mg, 0.005 mmol) and TsOH·H<sub>2</sub>O (4.0 mg, 0.02 mmol). Then, the reaction mixture was stirred at 25 °C for 1.5 hours. After the completion of the reaction, which was indicated by TLC, the reaction mixture was directly purified through preparative thin layer chromatography (toluene/ethyl acetate = 20:1) to afford pure product **5da** (42.9 mg) in 80% yield as light yellow solid.

m.p. 45-49 °C; *E/Z* > 95:5; <sup>1</sup>H NMR (400 MHz, CDCl<sub>3</sub>) δ 8.41 (d, *J* = 7.3 Hz, 2H), 7.64 (d, *J* = 6.7 Hz, 2H), 7.60 – 7.53 (m, 3H), 7.53 – 7.32 (m, 5H), 7.21 (d, *J* = 8.1 Hz, 2H), 7.11 (d, *J* = 8.1 Hz, 1H), 6.95 (d, *J* = 8.1 Hz, 1H), 6.89 (s, 1H), 6.14 (s, 1H), 6.04 (d, *J* = 15.8 Hz, 1H), 5.76 – 5.59 (m, 1H), 3.10 – 2.84 (m, 2H), 2.39 (s, 3H), 2.20 (s, 3H); <sup>13</sup>C NMR (100 MHz, CDCl<sub>3</sub>) δ 164.0, 156.2, 143.7, 138.3, 136.7, 136.4, 132.7, 132.1, 131.5, 130.4, 129.6, 129.3, 129.1, 128.8, 128.7, 128.4, 127.7, 126.0, 125.6, 124.5, 106.0, 45.2, 21.6, 20.9; IR (KBr): 2923, 1773, 1396, 1162, 962, 749 cm<sup>-1</sup>; HRMS (ESI-TOF) *m/z*: [M + H]<sup>+</sup> Calcd for C<sub>32</sub>H<sub>29</sub>N<sub>2</sub>O<sub>4</sub>S 537.1848, found 537.1848.

**(*E*)-*N*-(4-methoxy-2-(3-(5-oxo-2,4-diphenyl-4,5-dihydrooxazol-4-yl)prop-1-en-1-yl)phenyl)-4-methylbenzenesulfonamide (5ea)** : Following the general procedure, under an argon atmosphere, acetone (4 mL) was added to the mixture of vinyl benzoxazinone **1e** (35.9 mg, 0.1 mmol), azlactone **4a** (35.6 mg, 0.15 mmol), [Ir(COD)Cl]<sub>2</sub> (3.4 mg, 0.005 mmol) and TsOH·H<sub>2</sub>O (4.0 mg, 0.02 mmol). Then, the reaction mixture was stirred at 25 °C for 1.5 hours. After the completion of the reaction, which was indicated by TLC, the reaction mixture was directly purified through preparative thin layer chromatography (toluene/ethyl acetate = 20:1) to afford pure product **5ea** (45.8 mg) in 83% yield as light yellow solid.

m.p. 79-80 °C; inseparable *E/Z*-isomers (*E/Z* = 93:7); <sup>1</sup>H NMR (400 MHz, CDCl<sub>3</sub>) δ 8.49 – 8.28 (m, 2H), 7.63 (dd, *J* = 7.9, 1.4 Hz, 2H), 7.59 – 7.41 (m, 8H), 7.21 (d, *J* = 8.1 Hz, 2H), 7.08 (d, *J* = 8.8 Hz, 1H), 6.69 (dd, *J* = 8.8, 2.9 Hz, 1H), 6.60 (d, *J* = 2.8 Hz, 1H), 6.03 (d, *J* = 15.8 Hz, 1H), 5.97 (s, 1H), 5.73 – 5.61 (m, 1H), 3.66 (s, 3H), 3.02 – 2.83 (m, 2H), 2.40 (s, 3H); <sup>13</sup>C NMR (100 MHz, CDCl<sub>3</sub>) δ 164.0, 158.4, 156.2, 143.7, 138.3, 136.7, 134.8, 132.7, 131.6, 129.6, 129.1, 128.9, 128.8, 128.7, 128.4, 127.3, 126.0, 125.9, 125.0, 114.2, 111.5, 105.9, 55.3, 45.1, 21.9; IR (KBr): 2962, 1773, 1494, 1160, 803, 749 cm<sup>-1</sup>; HRMS (ESI-TOF) *m/z*: [M + H]<sup>+</sup> Calcd for C<sub>32</sub>H<sub>29</sub>N<sub>2</sub>O<sub>5</sub>S 553.1797, found 553.1805.

**(*E*)-*N*-(4-fluoro-2-(3-(5-oxo-2,4-diphenyl-4,5-dihydrooxazol-4-yl)prop-1-en-1-yl)phenyl)-4-methylbenzenesulfonamide (5fa)**: Following the general procedure, under an argon atmosphere, acetone (4 mL) was added to the mixture of vinyl benzoxazinone **1f** (34.7 mg, 0.1 mmol), azlactone **4a** (35.6 mg, 0.15 mmol), [Ir(COD)Cl]<sub>2</sub> (3.4 mg, 0.005 mmol) and TsOH·H<sub>2</sub>O (4.0 mg, 0.02 mmol) Then, the reaction mixture was stirred at 25 °C for 1.5 hours. After the completion of

the reaction, which was indicated by TLC, the reaction mixture was directly purified through preparative thin layer chromatography (toluene/ethyl acetate = 20:1) to afford pure product **5fa** (27.5 mg) in 51% yield as light yellow solid.

m.p. 67-68 °C; inseparable *E/Z*-isomers (*E/Z* = 89:11); <sup>1</sup>H NMR (400 MHz, CDCl<sub>3</sub>) δ 8.40 (d, *J* = 7.4 Hz, 2H), 7.65 – 7.40 (m, 10H), 7.25 – 7.15 (m, 3H), 6.92 – 6.77 (m, 2H), 6.06 (s, 1H), 6.01 (d, *J* = 15.8 Hz, 1H), 5.78 – 5.66 (m, 1H), 3.02 – 2.86 (m, 2H), 2.40 (s, 3H); <sup>13</sup>C NMR (100 MHz, CDCl<sub>3</sub>) δ 163.9, 161.1 (*J* = 245 Hz), 159.9, 156.3, 144.0, 138.1, 136.4, 134.9 (*J* = 8.3 Hz), 132.8, 129.7, 129.2, 128.9, 128.8, 128.7, 127.2, 126.4, 126.0, 115.4 (*J* = 22.6 Hz), 113.4 (*J* = 23.3 Hz), 105.8, 45.1, 21.6; IR (KBr): 2916, 1773, 1507, 1261, 1161, 962, 750 cm<sup>-1</sup>; HRMS (ESI-TOF) *m/z*: [M + H]<sup>+</sup> Calcd for C<sub>31</sub>H<sub>26</sub>FN<sub>2</sub>O<sub>4</sub>S 541.1597, found 541.1591.

**(*E*)-*N*-(4-chloro-2-(3-(5-oxo-2,4-diphenyl-4,5-dihydrooxazol-4-yl)prop-1-en-1-yl)phenyl)-4-methylbenzenesulfonamide (5ga):** Following the general procedure, under an argon atmosphere, acetone (4 mL) was added to the mixture of vinyl benzoxazinone **1g** (36.3 mg, 0.1 mmol), azlactone **4a** (35.6 mg, 0.15 mmol), [Ir(COD)Cl]<sub>2</sub> (3.4 mg, 0.005 mmol) and TsOH·H<sub>2</sub>O (4.0 mg, 0.02 mmol). Then, the reaction mixture was stirred at 25 °C for 1.5 hours. After the completion of the reaction, which was indicated by TLC, the reaction mixture was directly purified through preparative thin layer chromatography (toluene/ethyl acetate = 20:1) to afford pure product **5ga** (38.9 mg) in 70% yield as light yellow solid.

m.p. 72-73 °C; inseparable *E/Z*-isomers (*E/Z* = 87:13); <sup>1</sup>H NMR (400 MHz, CDCl<sub>3</sub>) δ 8.49 – 8.31 (m, 2H), 7.67 – 7.61 (m, 2H), 7.60 – 7.41 (m, 8H), 7.25 – 7.17 (m, 3H), 7.15 – 7.08 (m, 1H), 7.06 (d, *J* = 2.3 Hz, 1H), 6.22 (s, 1H), 5.98 (d, *J* = 15.8 Hz, 1H), 5.79 – 5.65 (m, 1H), 3.05 – 2.86 (m, 2H), 2.39 (s, 3H); <sup>13</sup>C NMR (100 MHz, CDCl<sub>3</sub>) δ 163.9, 156.3, 144.1, 138.1, 136.3, 133.3, 132.8, 132.0, 131.7, 130.1, 130.0, 129.7, 129.3, 129.1, 128.9, 128.8, 128.7, 128.5, 128.3, 127.2, 127.1, 127.0, 126.9, 126.8, 126.3, 126.0, 105.8, 45.2, 21.6; IR (KBr): 2918, 1776, 1333, 1163, 963, 748 cm<sup>-1</sup>; HRMS (ESI-TOF) *m/z*: [M + H]<sup>+</sup> Calcd for C<sub>31</sub>H<sub>26</sub>ClN<sub>2</sub>O<sub>4</sub>S 557.1302, found 557.1304.

**(*E*)-*N*-(4-bromo-2-(3-(5-oxo-2,4-diphenyl-4,5-dihydrooxazol-4-yl)prop-1-en-1-yl)phenyl)-4-methylbenzenesulfonamide (5ha):** Following the general procedure, under an argon atmosphere, acetone (4 mL) was added to the mixture of vinyl benzoxazinone **1h** (40.6 mg, 0.1 mmol),

azlactone **4a** (35.6 mg, 0.15 mmol), [Ir(COD)Cl]<sub>2</sub> (3.4 mg, 0.005 mmol) and TsOH·H<sub>2</sub>O (4.0 mg, 0.02 mmol). Then, the reaction mixture was stirred at 25 °C for 1.5 hours. After the completion of the reaction, which was indicated by TLC, the reaction mixture was directly purified through preparative thin layer chromatography (toluene/ethyl acetate = 20:1) to afford pure product **5ha** (49.2 mg) in 82% yield as light yellow solid.

m.p. 81-82 °C; inseparable *E/Z*-isomers (*E/Z* = 83:17); <sup>1</sup>H NMR (400 MHz, CDCl<sub>3</sub>) δ 8.60 – 8.26 (m, 2H), 7.63 (dd, *J* = 8.0, 1.6 Hz, 2H), 7.59 – 7.43 (m, 8H), 7.26 – 7.19 (m, 4H), 7.16 (d, *J* = 8.6 Hz, 1H), 6.27 (s, 1H), 5.98 (d, *J* = 15.8 Hz, 1H), 5.80 – 5.63 (m, 1H), 3.07 – 2.84 (m, 2H), 2.39 (s, 3H); <sup>13</sup>C NMR (100 MHz, CDCl<sub>3</sub>) δ 163.9, 156.3, 144.1, 138.1, 136.3, 133.5, 132.8, 132.2, 131.5, 130.1, 129.8, 129.3, 129.1, 128.9, 128.8, 128.7, 128.5, 128.3, 127.2, 126.9, 126.8, 126.3, 126.0, 119.7, 105.8, 45.2, 21.6; IR (KBr): 2925, 1776, 1478, 1275, 1163, 962, 749 cm<sup>-1</sup>; HRMS (ESI-TOF) *m/z*: [M + H]<sup>+</sup> Calcd for C<sub>31</sub>H<sub>26</sub>BrN<sub>2</sub>O<sub>4</sub>S 601.0797, found 601.0792.

**(*E*)-*N*-(5-fluoro-2-(3-(5-oxo-2,4-diphenyl-4,5-dihydrooxazol-4-yl)prop-1-en-1-yl)phenyl)-4-methylbenzenesulfonamide (**5ia**):** Following the general procedure, under an argon atmosphere, acetone (4 mL) was added to the mixture of vinyl benzoxazinone **1i** (34.7 mg, 0.1 mmol), azlactone **4a** (35.6 mg, 0.15 mmol), [Ir(COD)Cl]<sub>2</sub> (3.4 mg, 0.005 mmol) and TsOH·H<sub>2</sub>O (4.0 mg, 0.02 mmol). Then, the reaction mixture was stirred at 25 °C for 1.5 hours. After the completion of the reaction, which was indicated by TLC, the reaction mixture was directly purified through preparative thin layer chromatography (toluene/ethyl acetate = 20:1) to afford pure product **5ia** (50.2 mg) in 93% yield as light yellow solid.

m.p. 66-67 °C; *E/Z* > 95:5; <sup>1</sup>H NMR (400 MHz, CDCl<sub>3</sub>) δ 8.49 – 8.35 (m, 2H), 7.68 – 7.59 (m, 4H), 7.57 (d, *J* = 7.4 Hz, 1H), 7.54 – 7.39 (m, 5H), 7.23 (d, *J* = 8.1 Hz, 2H), 7.10 (dd, *J* = 10.1, 2.6 Hz, 1H), 7.01 (dd, *J* = 8.6, 6.2 Hz, 1H), 6.78 – 6.66 (m, 1H), 6.45 (s, 1H), 6.04 (d, *J* = 15.7 Hz, 1H), 5.73 – 5.58 (m, 1H), 3.11 – 2.88 (m, 2H), 2.39 (s, 3H); <sup>13</sup>C NMR (100 MHz, CDCl<sub>3</sub>) δ 164.0, 162.3 (*J* = 246 Hz), 156.3, 144.2, 138.2, 136.3, 134.7 (*J* = 10.7 Hz), 132.8, 130.2, 129.8, 129.2, 128.9, 128.8, 128.7, 128.3, 127.2, 126.5 (*J* = 3.3 Hz), 126.2, 126.0, 112.8 (*J* = 21.5 Hz), 110.3 (*J* = 25.3 Hz), 105.9, 45.2, 21.6; IR (KBr): 2918, 1774, 1497, 1335, 1168, 981, 749 cm<sup>-1</sup>; HRMS (ESI-TOF) *m/z*: [M + H]<sup>+</sup> Calcd for C<sub>31</sub>H<sub>26</sub>FN<sub>2</sub>O<sub>4</sub>S 541.1597, found 541.1591.



## 7. Procedure for one-mmol scale synthesis of product **3aa**

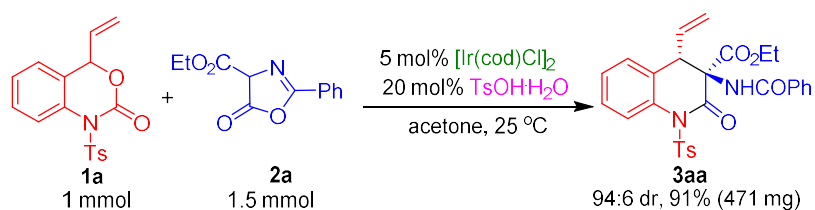

Under an argon atmosphere, acetone (40 mL) was added to the mixture of vinyl benzoxazinone **1a** (329 mg, 1 mmol), azlactone **2a** (350 mg, 1.5 mmol),  $[\text{Ir}(\text{COD})\text{Cl}]_2$  (34 mg, 0.05 mmol) and  $\text{TsOH}\cdot\text{H}_2\text{O}$  (40 mg, 0.2 mmol). Then, the reaction mixture was stirred at 25 °C for 1.5 hours. After the completion of the reaction, which was indicated by TLC, the reaction mixture was directly purified through flash chromatography to afford pure product **3aa** (471 mg) in 91% yield as light yellow solid.

## 8. NMR spectra of products 3, 5 and chiral 3

<sup>1</sup>H NMR (400 MHz, CDCl<sub>3</sub>) of compound **3aa**: inseparable diastereomers (dr = 94:6)

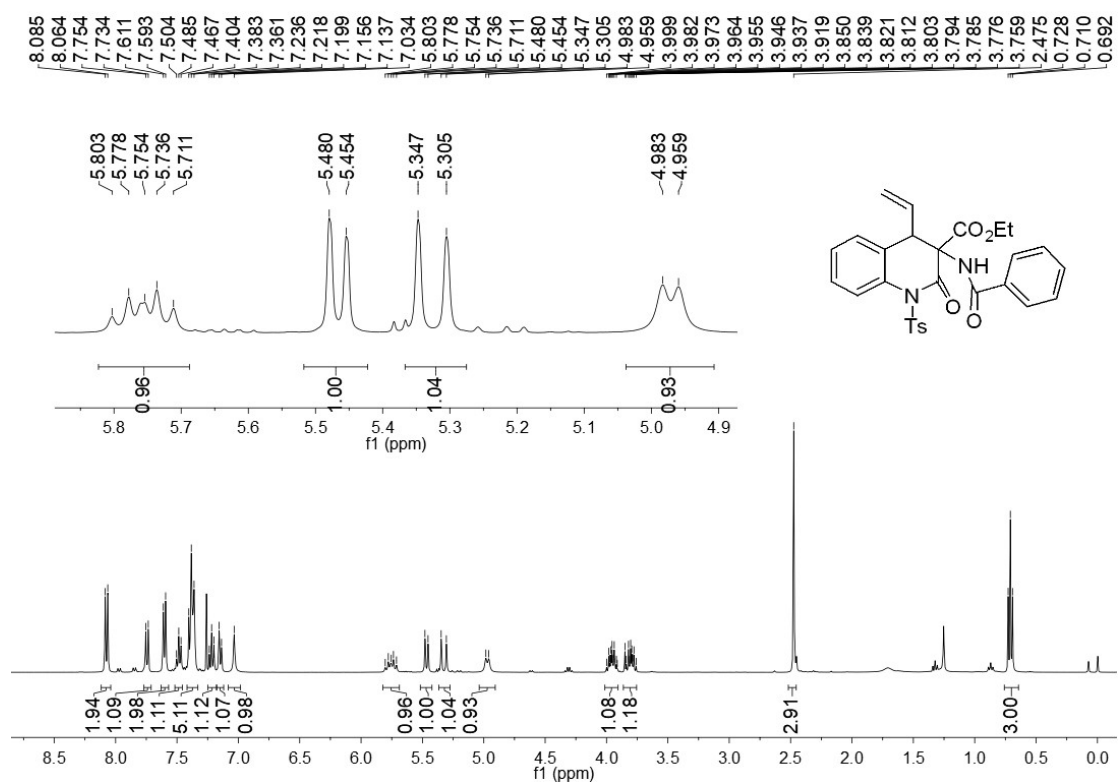

<sup>13</sup>C NMR (100 MHz, CDCl<sub>3</sub>) of compound **3aa**: inseparable diastereomers (dr = 94:6)

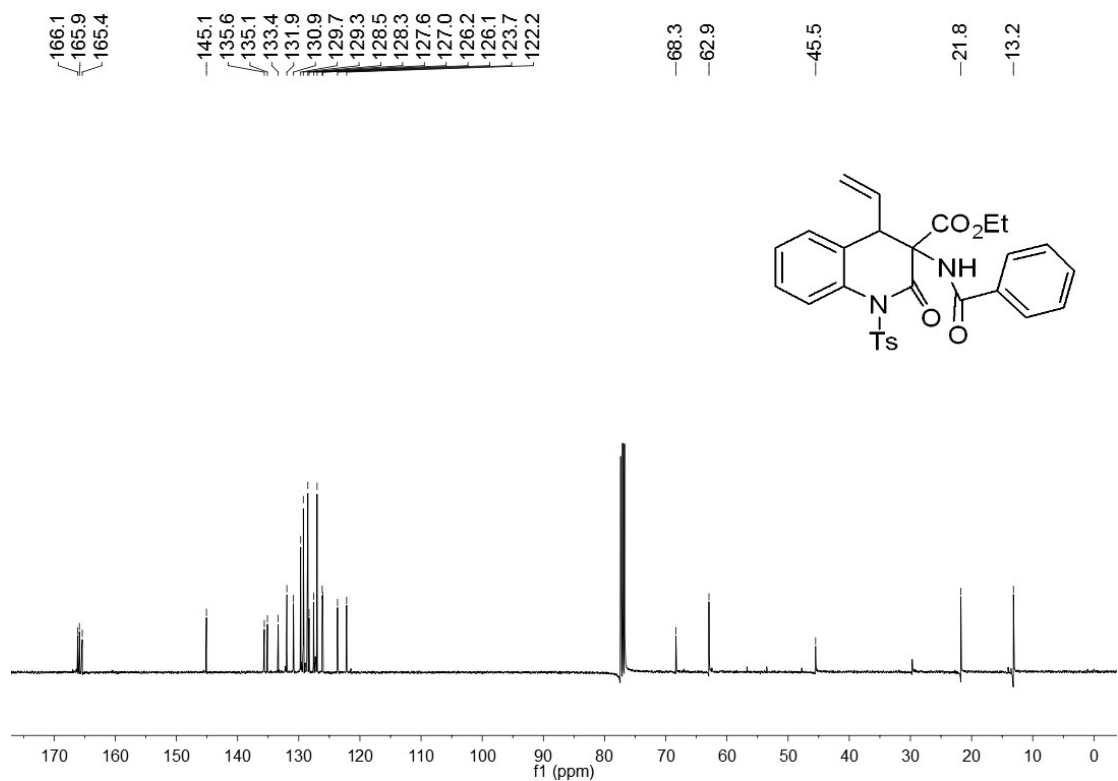

$^1\text{H}$  NMR (400 MHz,  $\text{CDCl}_3$ ) of compound **3ba**: inseparable diastereomers (dr > 95:5)

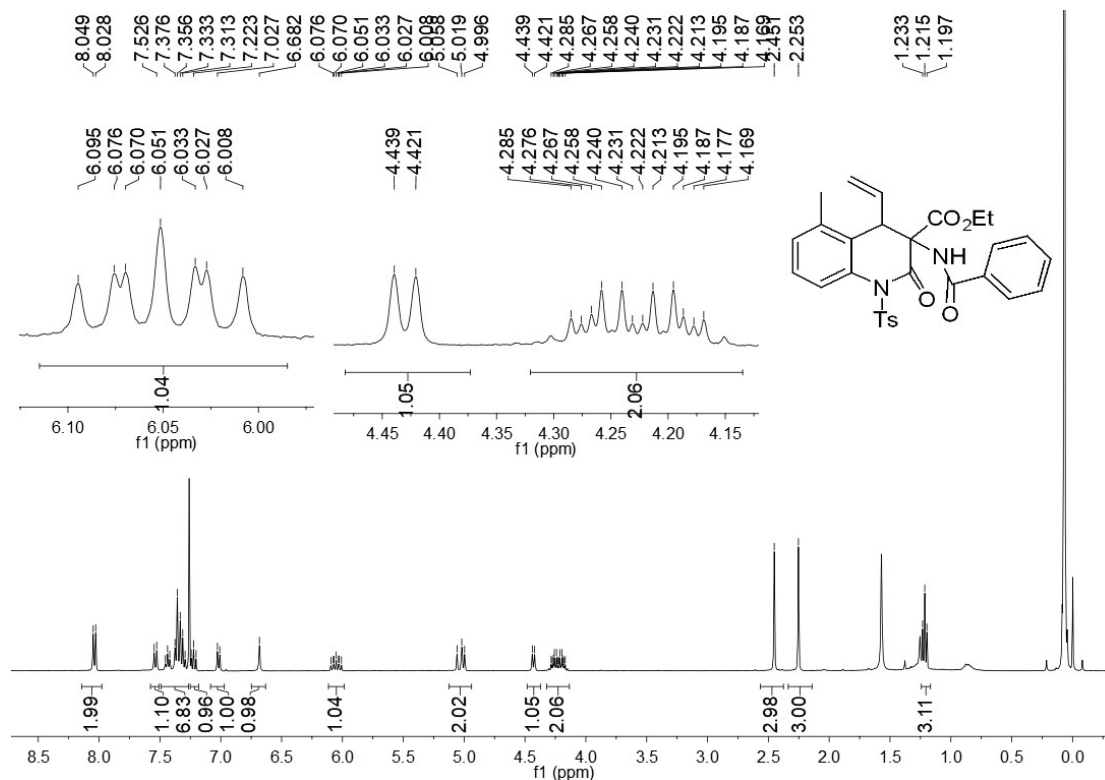

$^{13}\text{C}$  NMR (100 MHz,  $\text{CDCl}_3$ ) of compound **3ba**: inseparable diastereomers (dr > 95:5)

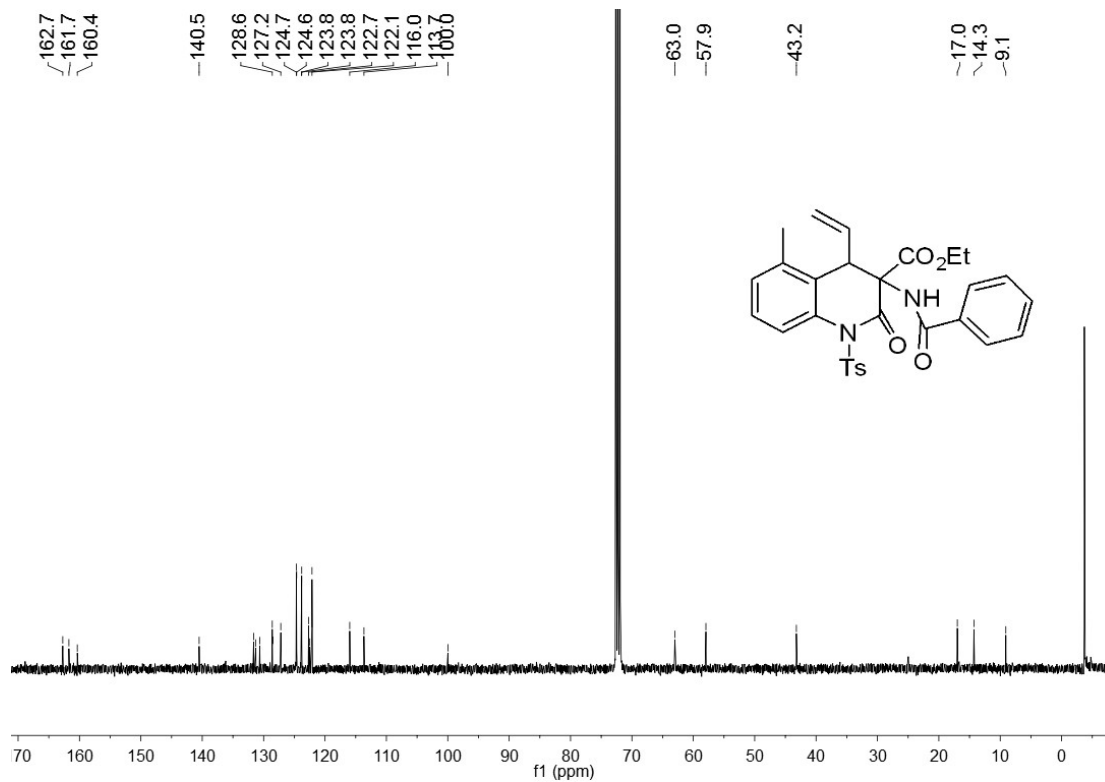

$^1\text{H}$  NMR (400 MHz,  $\text{CDCl}_3$ ) of compound **3ca**: inseparable diastereomers (dr > 95:5)

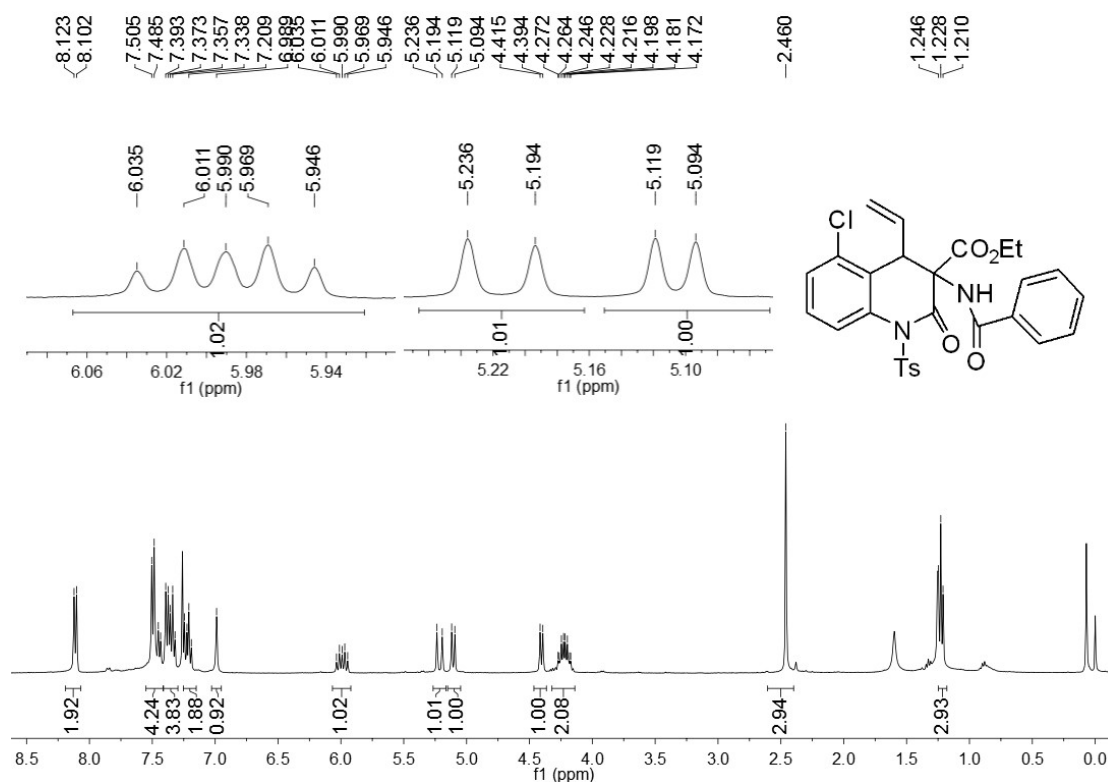

$^{13}\text{C}$  NMR (100 MHz,  $\text{CDCl}_3$ ) of compound **3ca**: inseparable diastereomers (dr > 95:5)

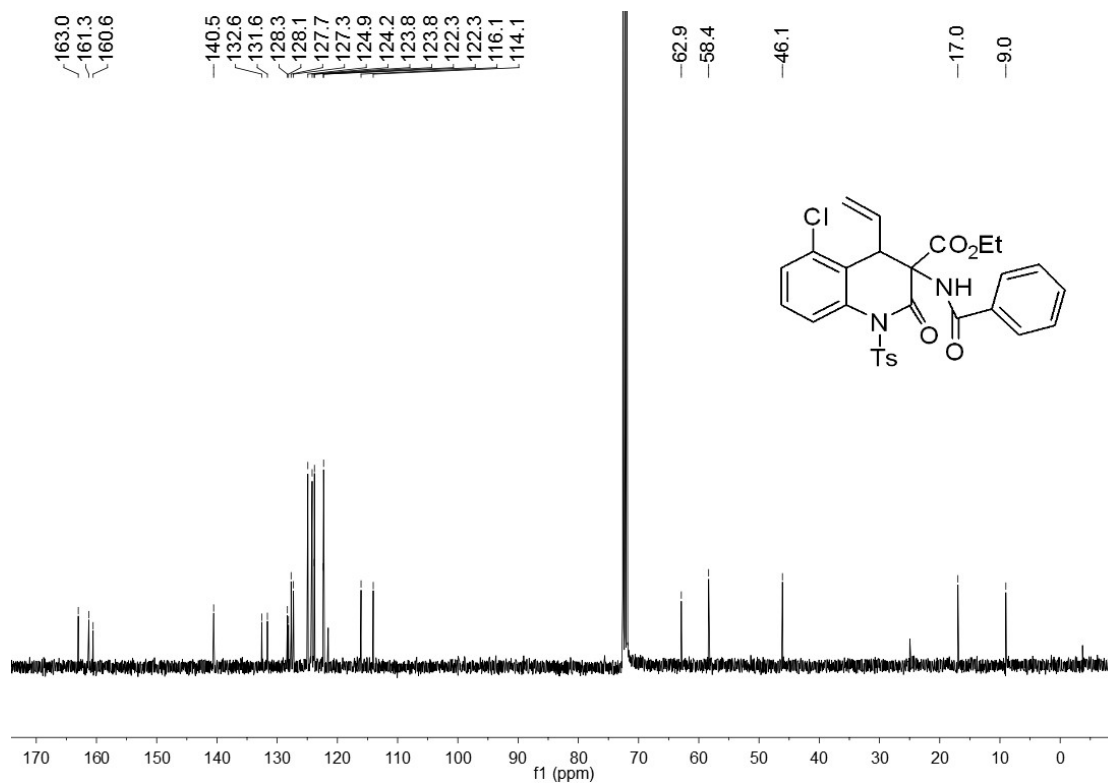

$^1\text{H}$  NMR (400 MHz,  $\text{CDCl}_3$ ) of compound **3da**: inseparable diastereomers (dr > 95:5)

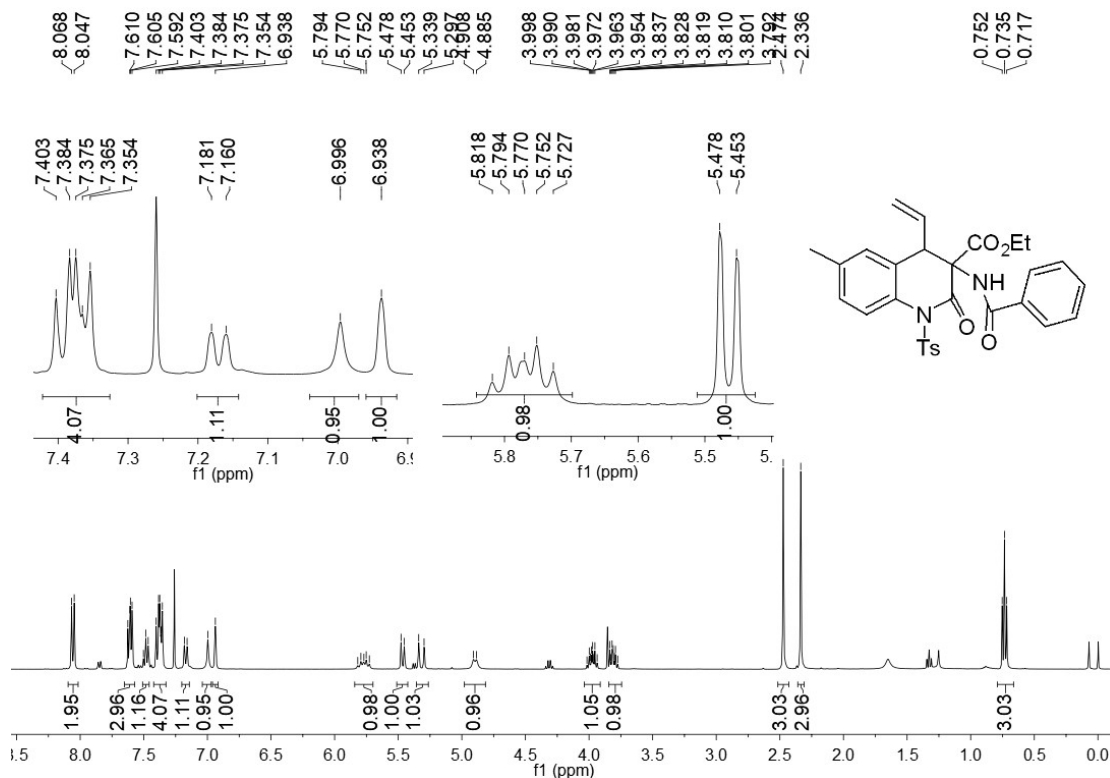

$^{13}\text{C}$  NMR (100 MHz,  $\text{CDCl}_3$ ) of compound **3da**: inseparable diastereomers (dr > 95:5)

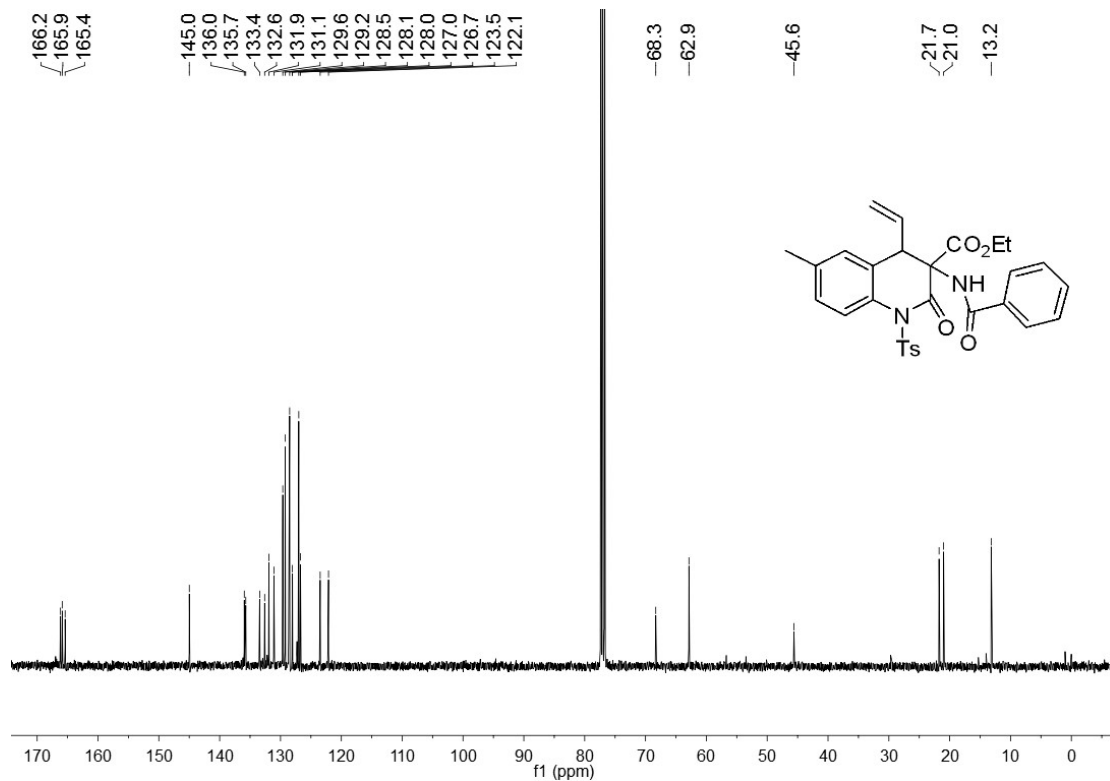

$^1\text{H}$  NMR (400 MHz,  $\text{CDCl}_3$ ) of compound **3ea**: inseparable diastereomers (dr > 95:5)

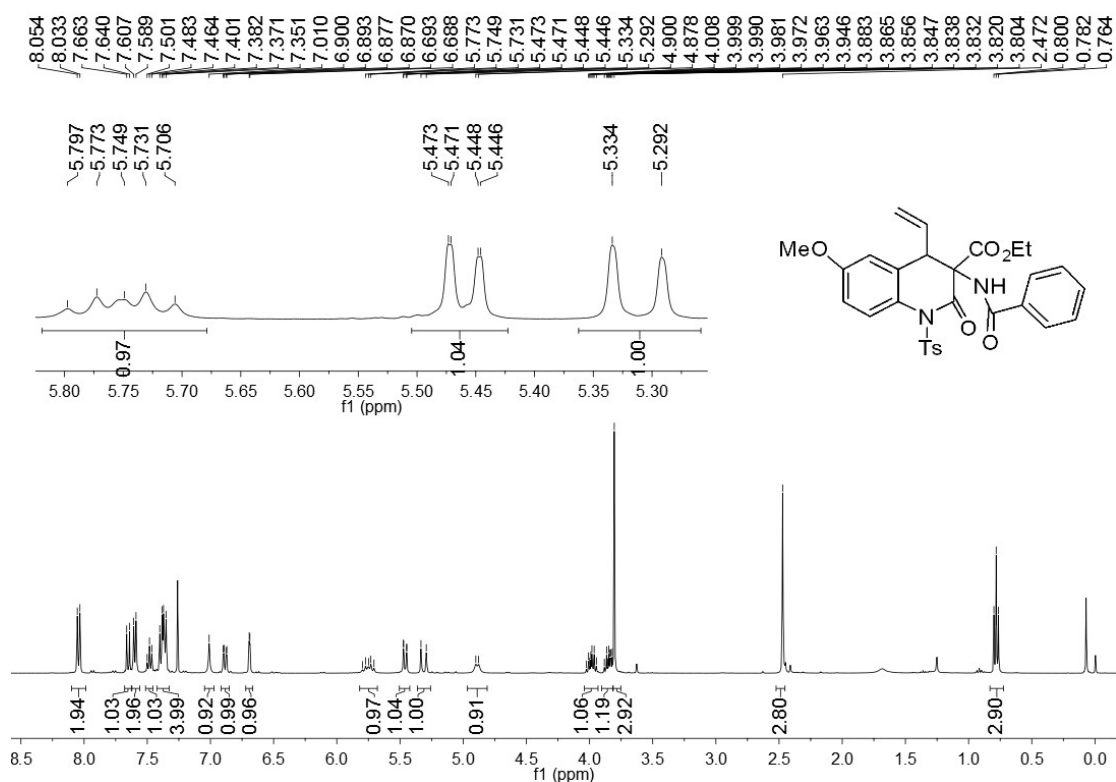

$^{13}\text{C}$  NMR (100 MHz,  $\text{CDCl}_3$ ) of compound **3ea**: inseparable diastereomers (dr > 95:5)

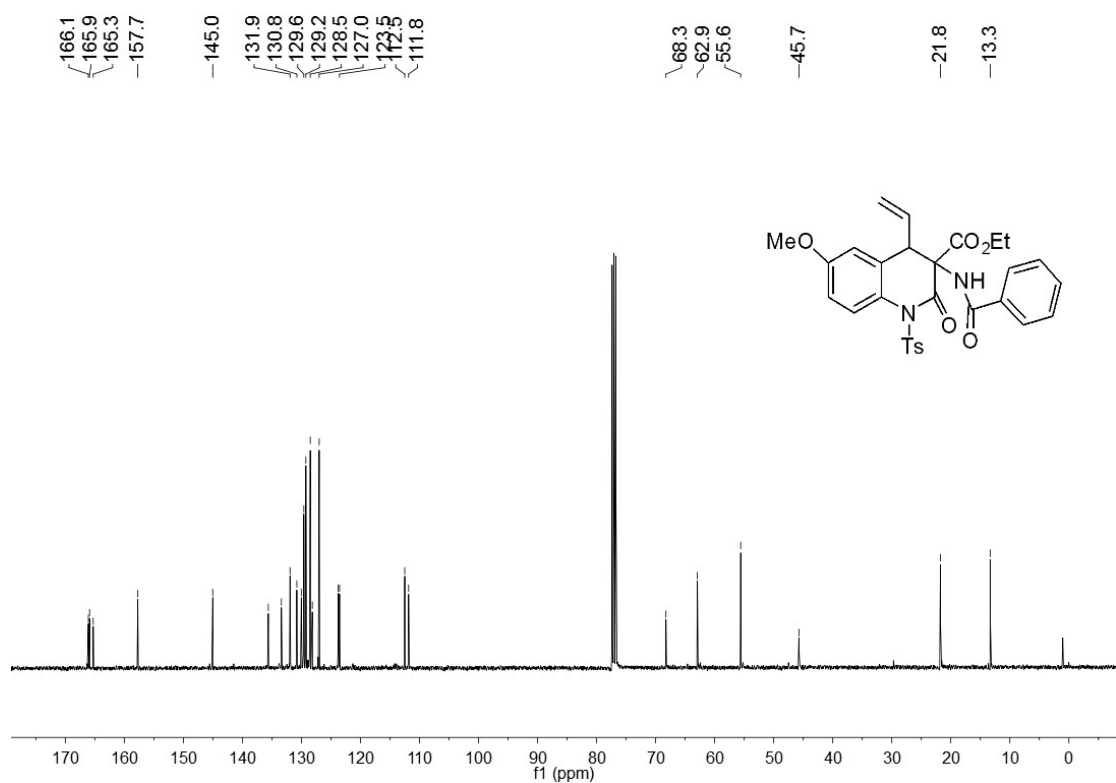

$^1\text{H}$  NMR (400 MHz,  $\text{CDCl}_3$ ) of compound **3fa**: inseparable diastereomers (dr = 95:5)

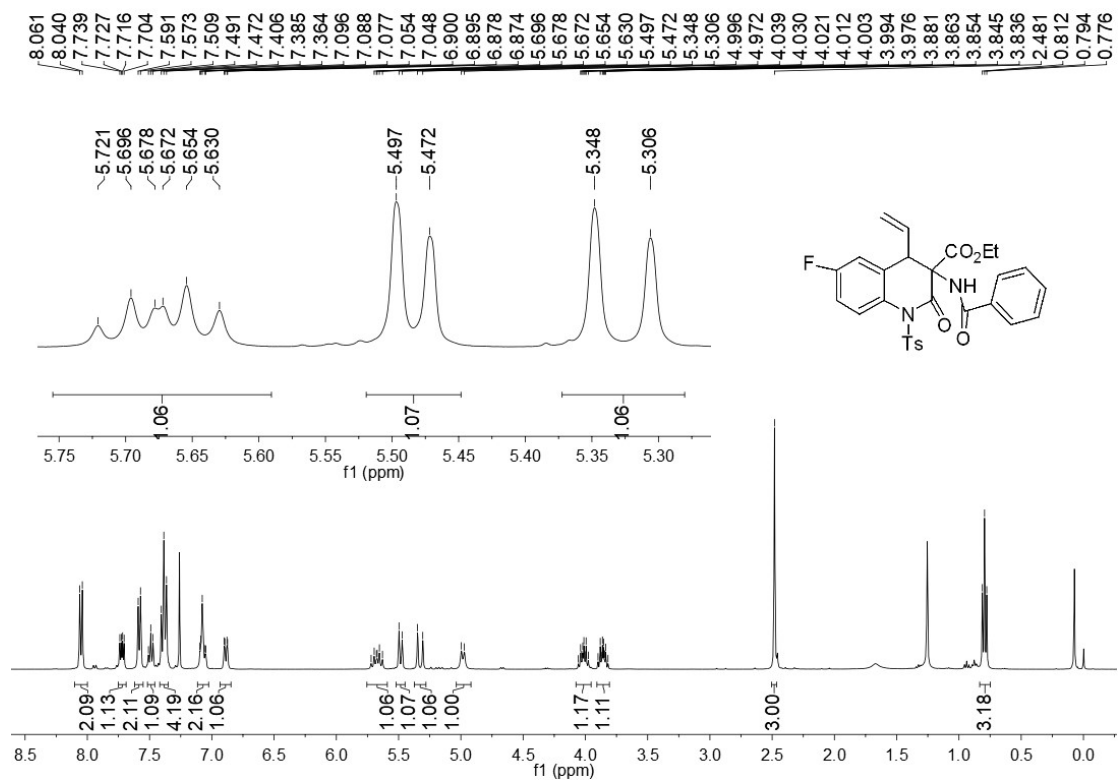

$^{13}\text{C}$  NMR (100 MHz,  $\text{CDCl}_3$ ) of compound **3fa**: inseparable diastereomers (dr = 95:5)

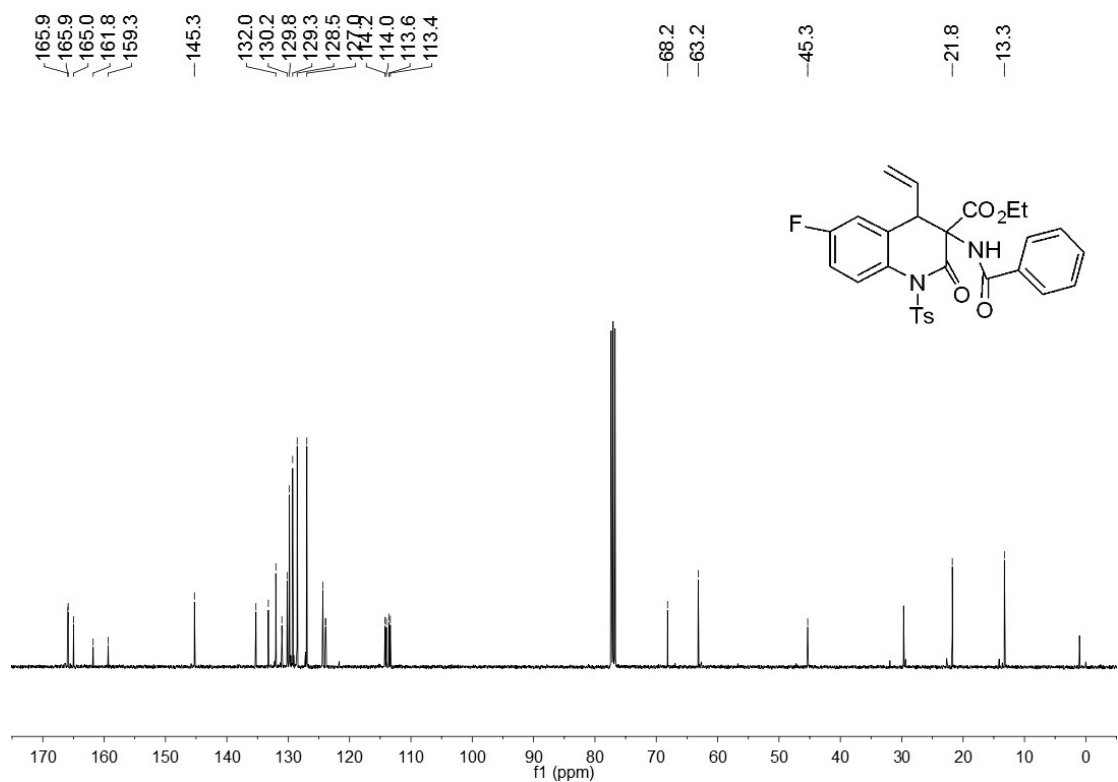

$^1\text{H}$  NMR (400 MHz,  $\text{CDCl}_3$ ) of compound **3ga**: inseparable diastereomers (dr > 95:5)

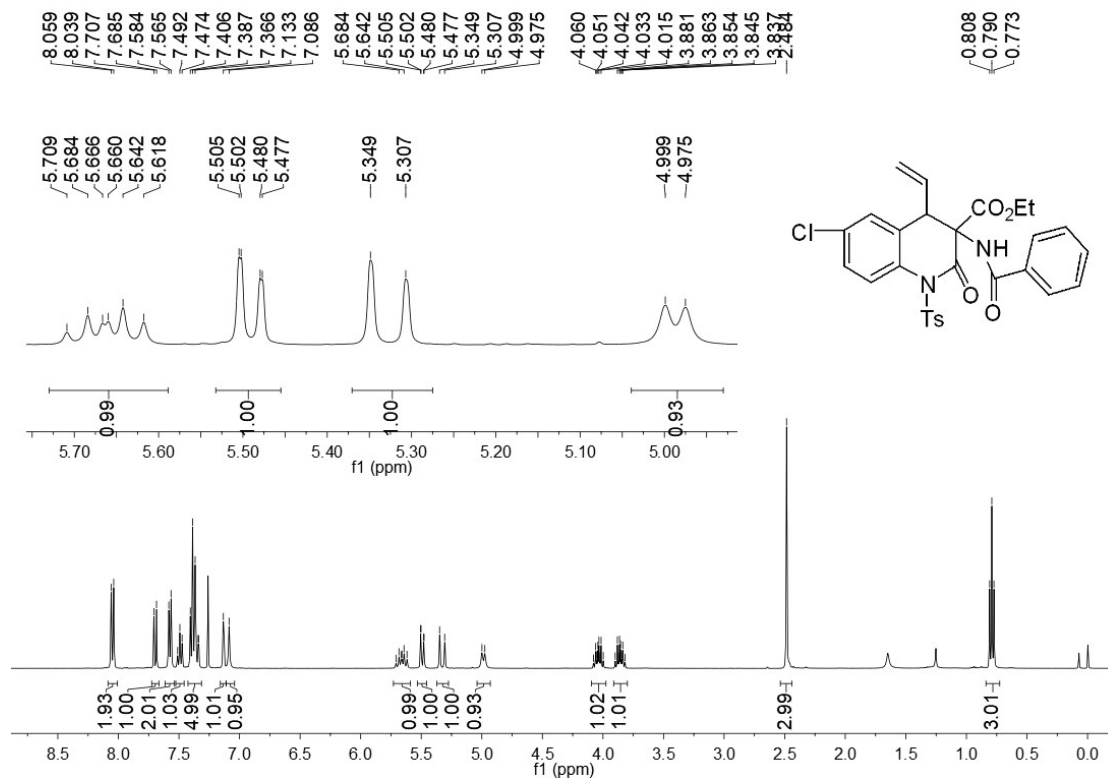

$^{13}\text{C}$  NMR (100 MHz,  $\text{CDCl}_3$ ) of compound **3ga**: inseparable diastereomers (dr > 95:5)

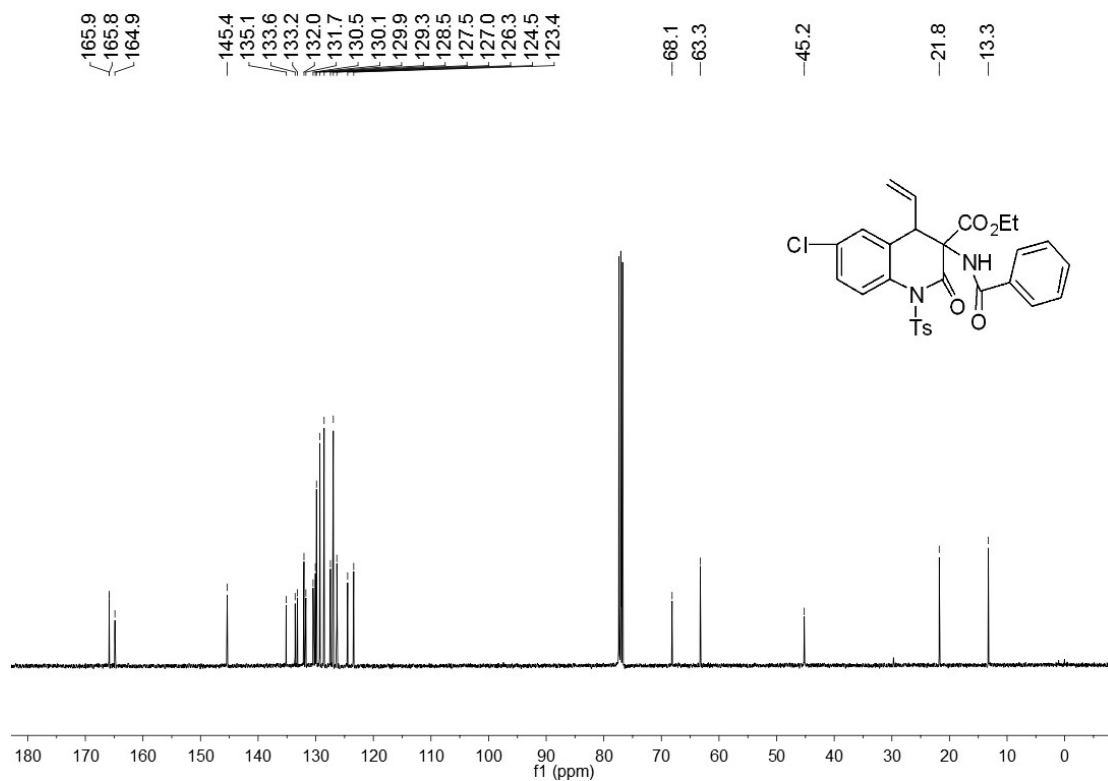



$^1\text{H}$  NMR (400 MHz,  $\text{CDCl}_3$ ) of compound **3ha**: inseparable diastereomers (dr > 95:5)

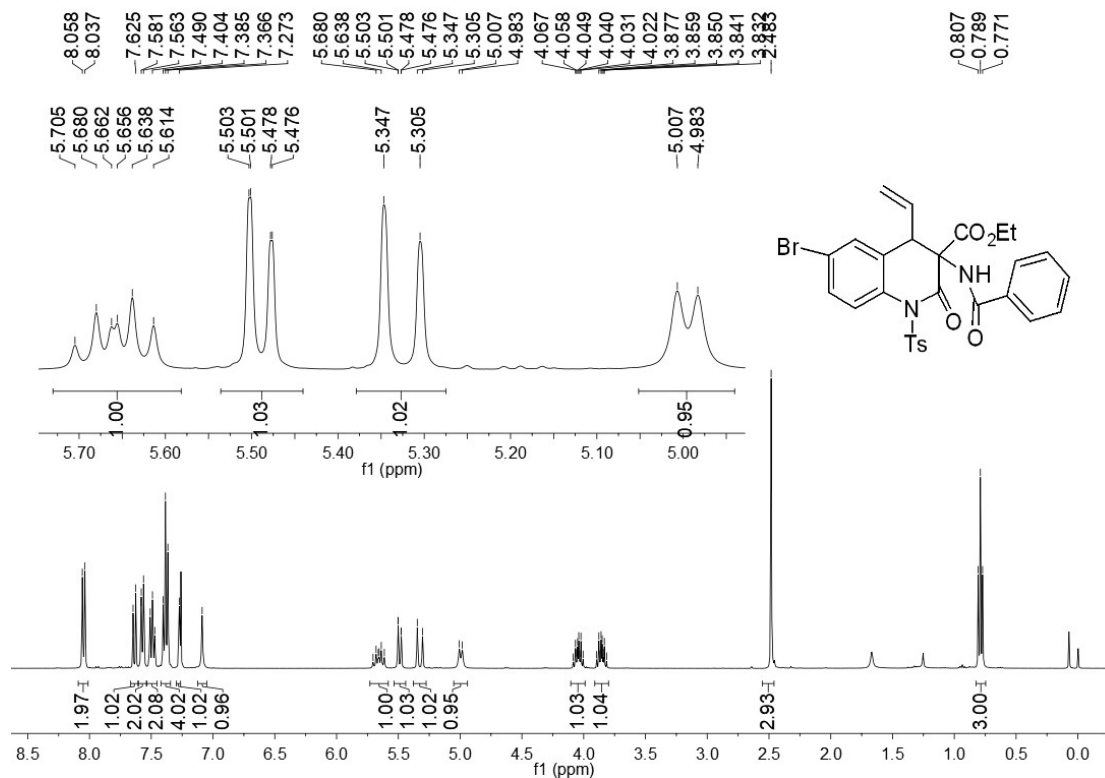

$^{13}\text{C}$  NMR (100 MHz,  $\text{CDCl}_3$ ) of compound **3ha**: inseparable diastereomers (dr > 95:5)

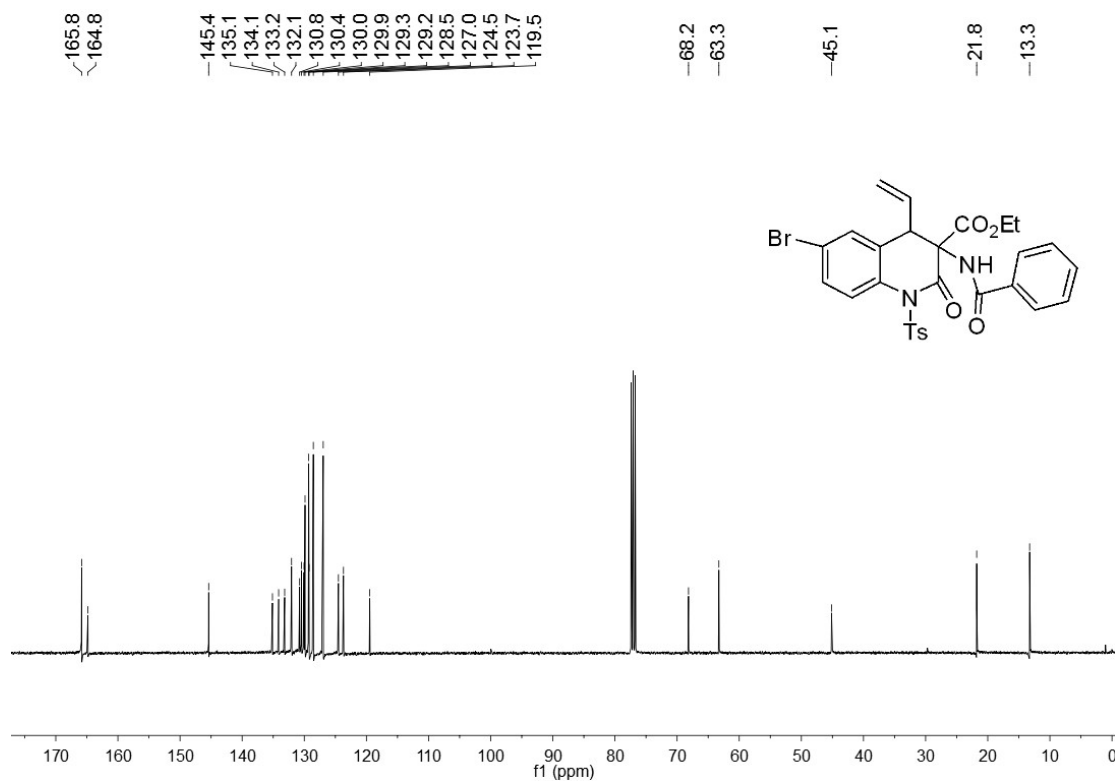

$^1\text{H}$  NMR (400 MHz,  $\text{CDCl}_3$ ) of compound **3ia**: inseparable diastereomers (dr = 92:8)

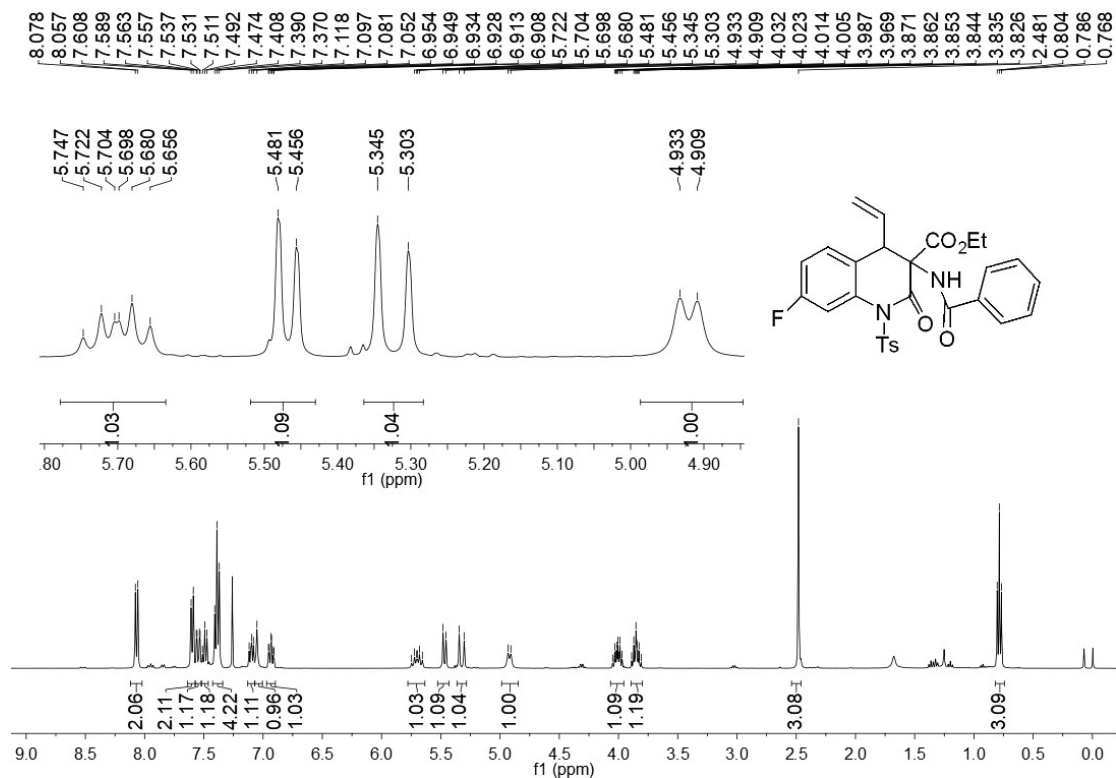

$^{13}\text{C}$  NMR (100 MHz,  $\text{CDCl}_3$ ) of compound **3ia**: inseparable diastereomers (dr = 92:8)

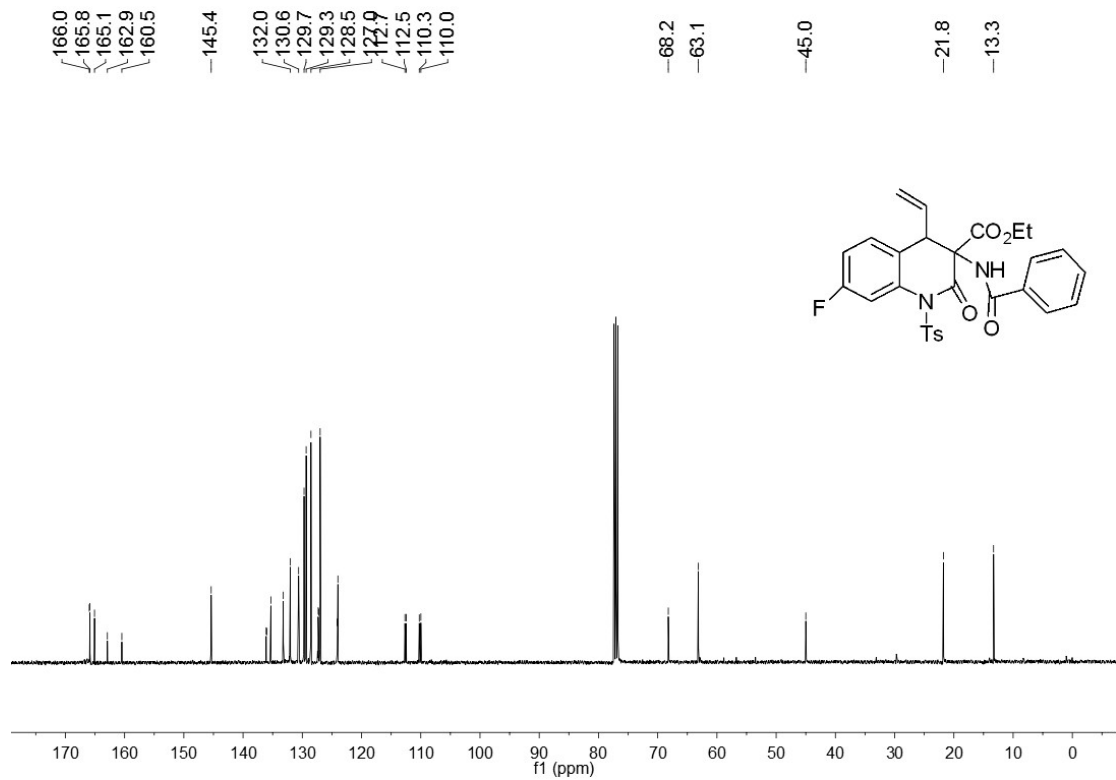

$^1\text{H}$  NMR (400 MHz,  $\text{CDCl}_3$ ) of compound **3ja**: inseparable diastereomers (dr = 91:9)

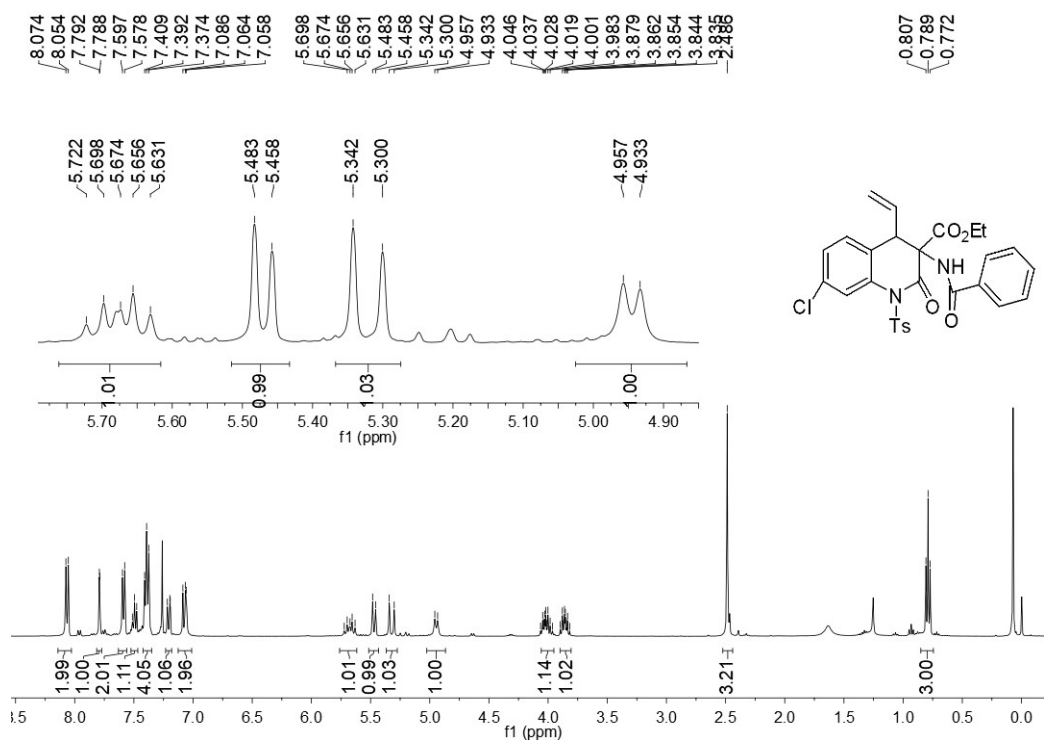

$^{13}\text{C}$  NMR (100 MHz,  $\text{CDCl}_3$ ) of compound **3ja**: inseparable diastereomers (dr = 91:9)

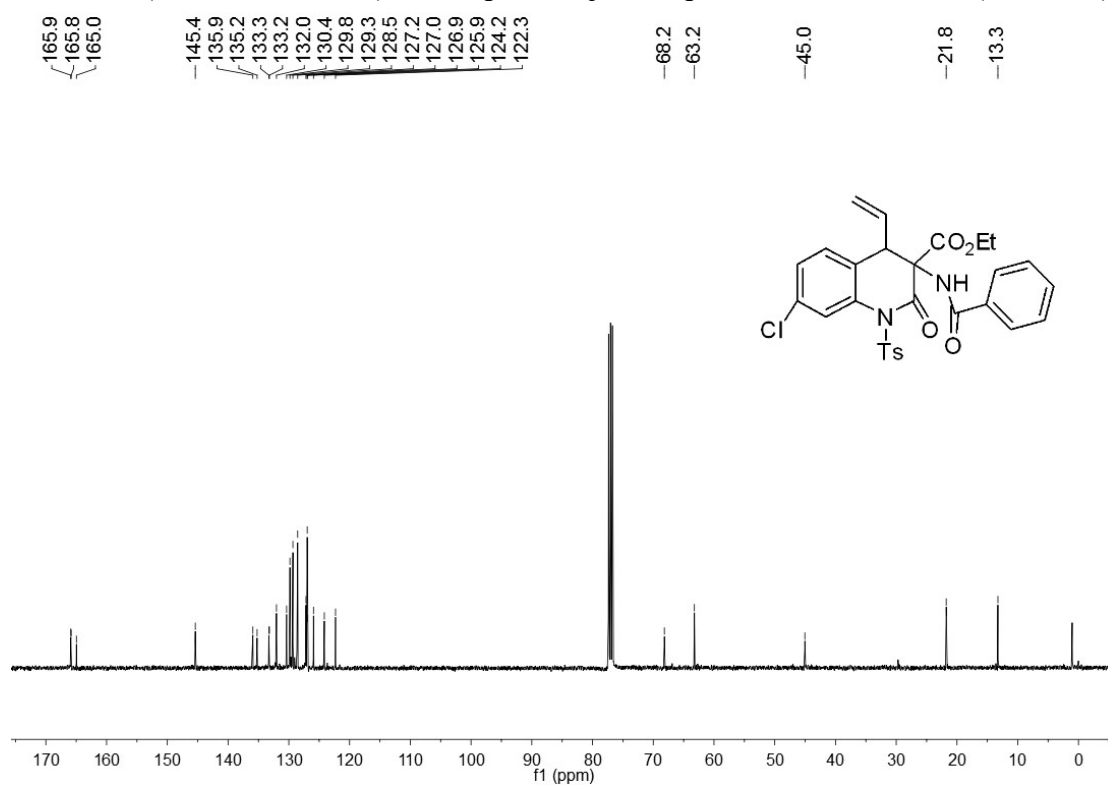

$^1\text{H}$  NMR (400 MHz,  $\text{CDCl}_3$ ) of compound **3ka**: inseparable diastereomers (dr = 95:5)

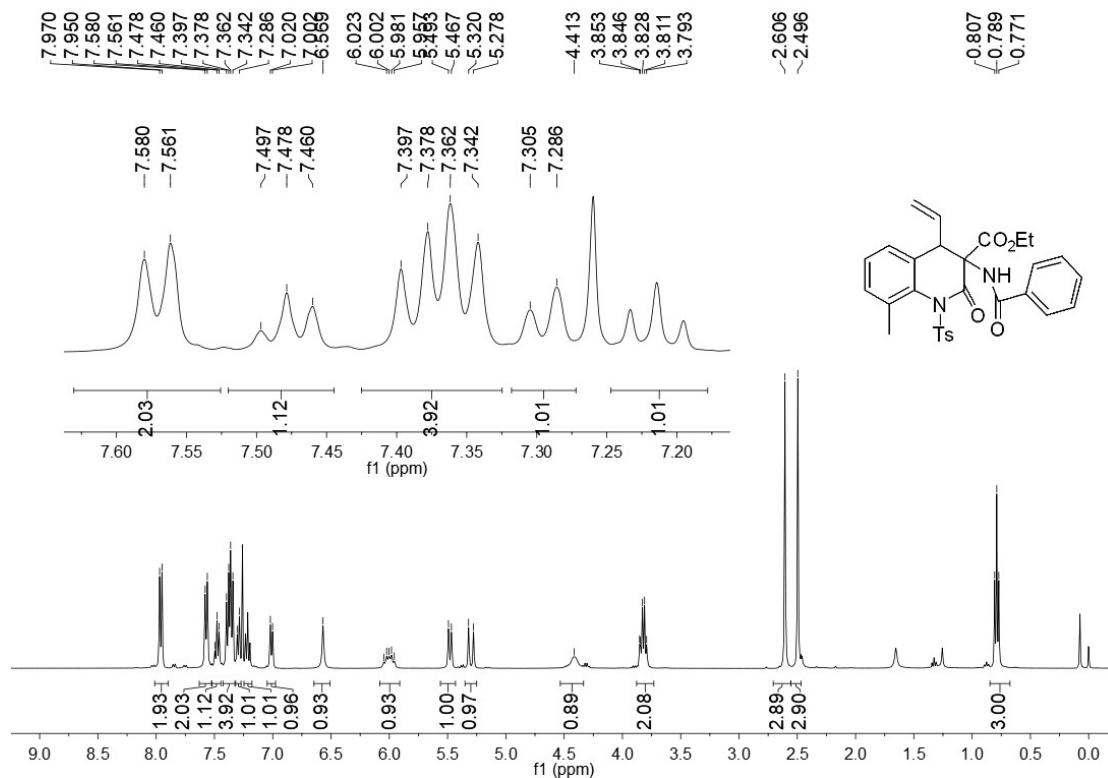

$^{13}\text{C}$  NMR (100 MHz,  $\text{CDCl}_3$ ) of compound **3ka**: inseparable diastereomers (dr= 95:5)

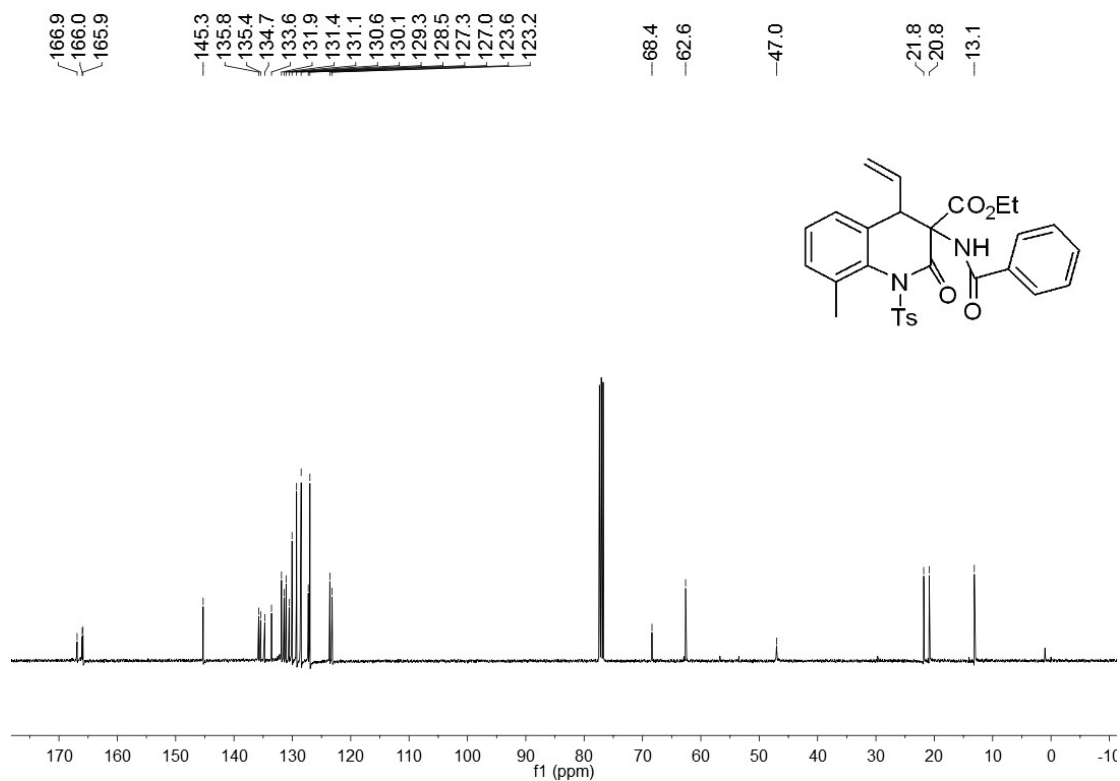

$^1\text{H}$  NMR (400 MHz,  $\text{CDCl}_3$ ) of compound **3la**: inseparable diastereomers (dr = 95:5)

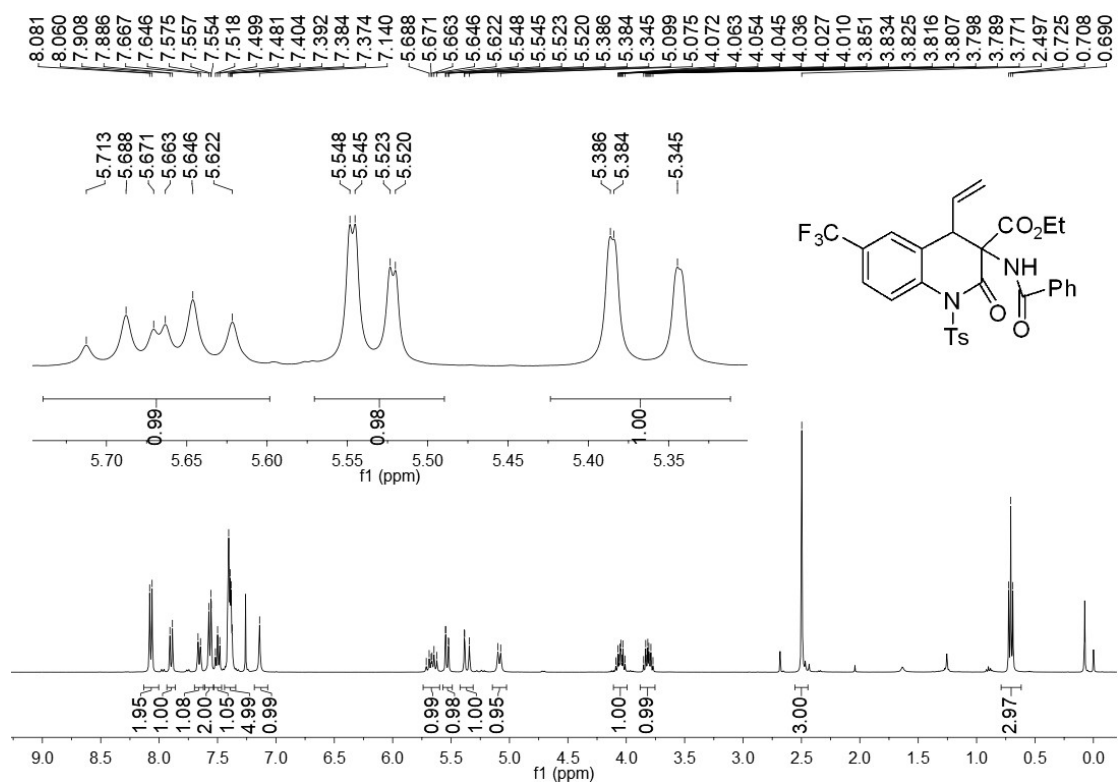

$^{13}\text{C}$  NMR (100 MHz,  $\text{CDCl}_3$ ) of compound **3la**: inseparable diastereomers (dr = 95:5)

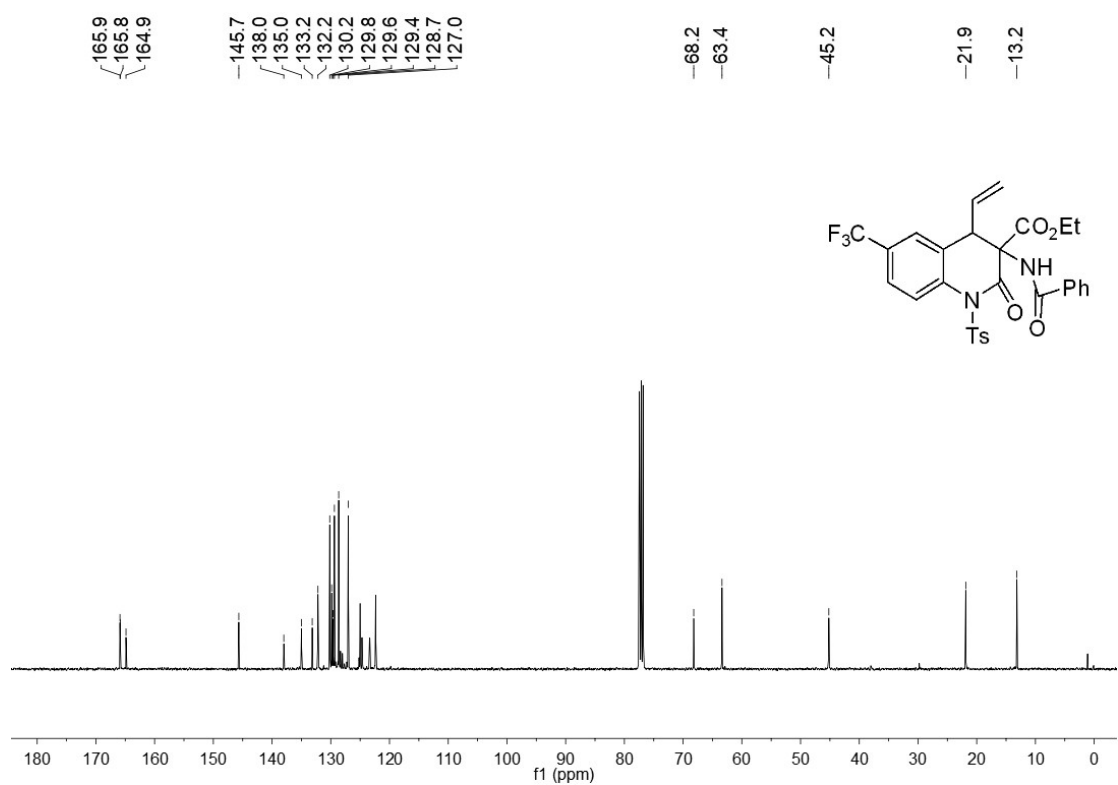

$^1\text{H}$  NMR (400 MHz,  $\text{CDCl}_3$ ) of compound **3ma**: inseparable diastereomers (dr = 93:7)

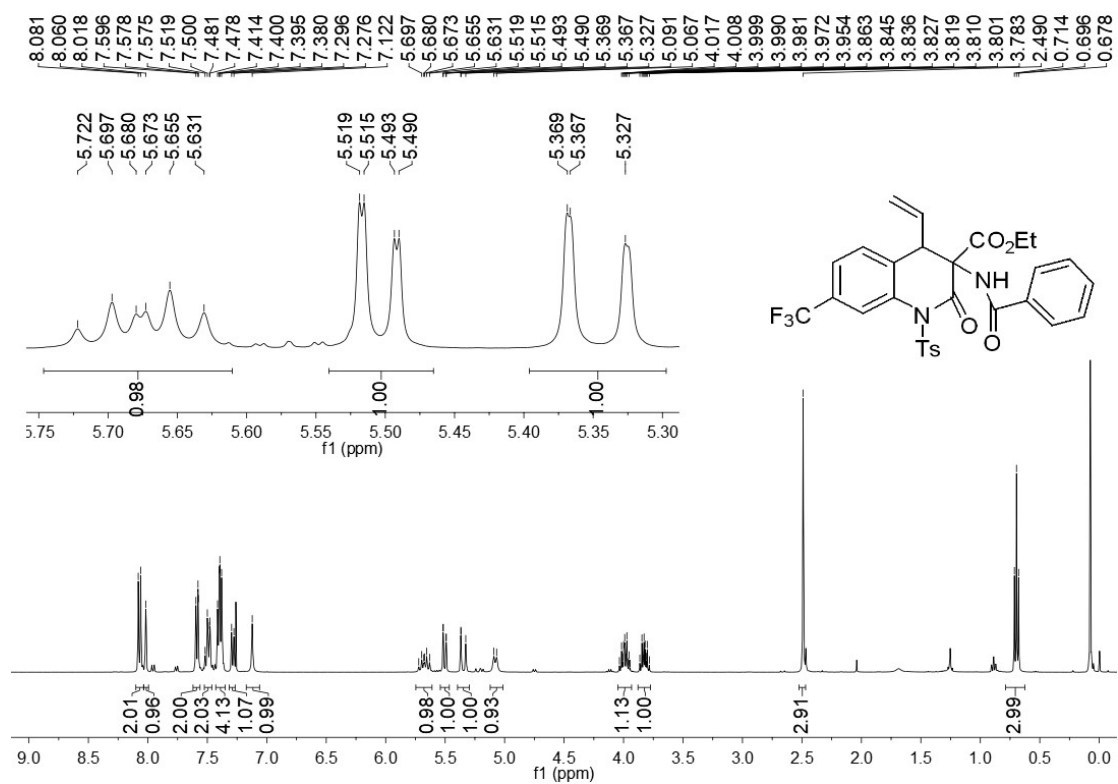

$^{13}\text{C}$  NMR (100 MHz,  $\text{CDCl}_3$ ) of compound **3ma**: inseparable diastereomers (dr = 93:7)

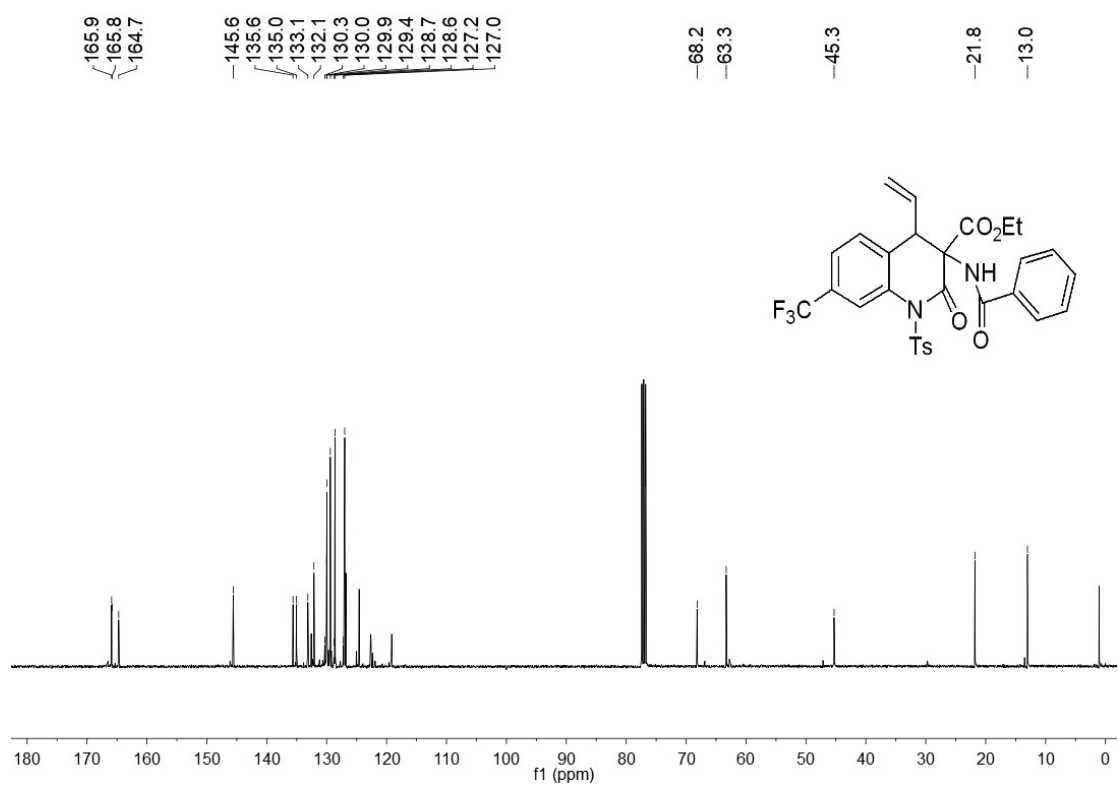

$^1\text{H}$  NMR (400 MHz,  $\text{CDCl}_3$ ) of compound **3ab**: inseparable diastereomers (dr > 95:5)

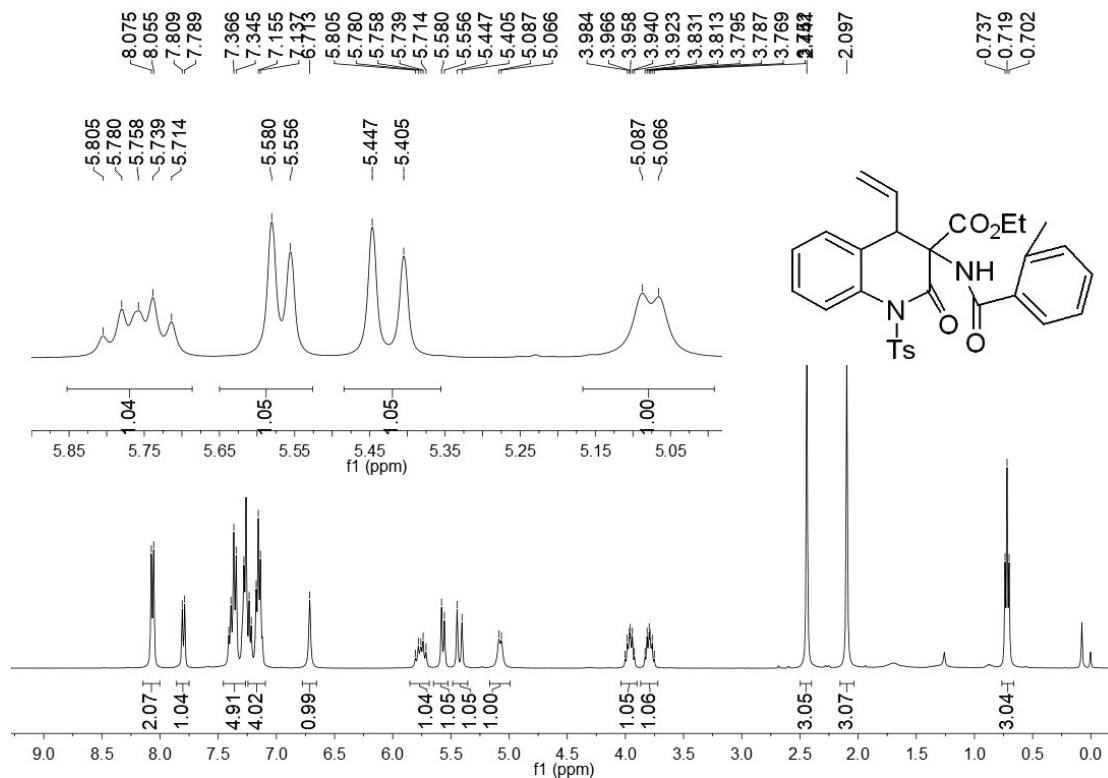

$^{13}\text{C}$  NMR (100 MHz,  $\text{CDCl}_3$ ) of compound **3ab**: inseparable diastereomers (dr > 95:5)

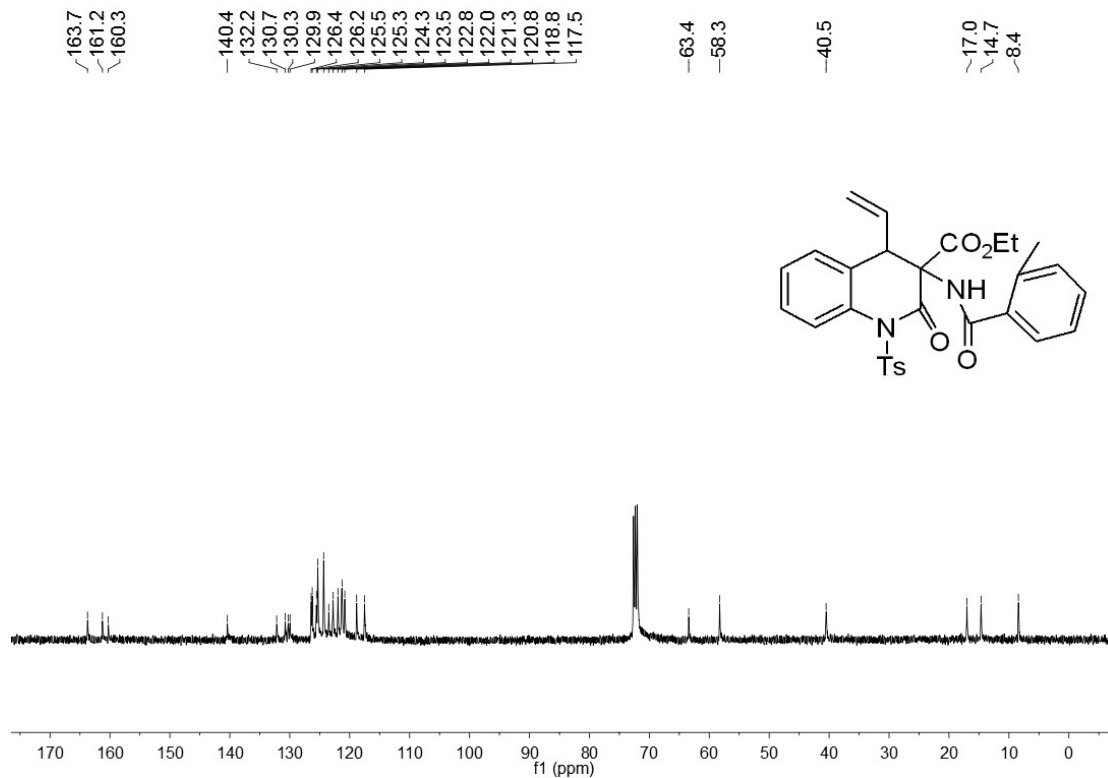

$^1\text{H}$  NMR (400 MHz,  $\text{CDCl}_3$ ) of compound **3ac**: inseparable diastereomers (dr = 95:5)

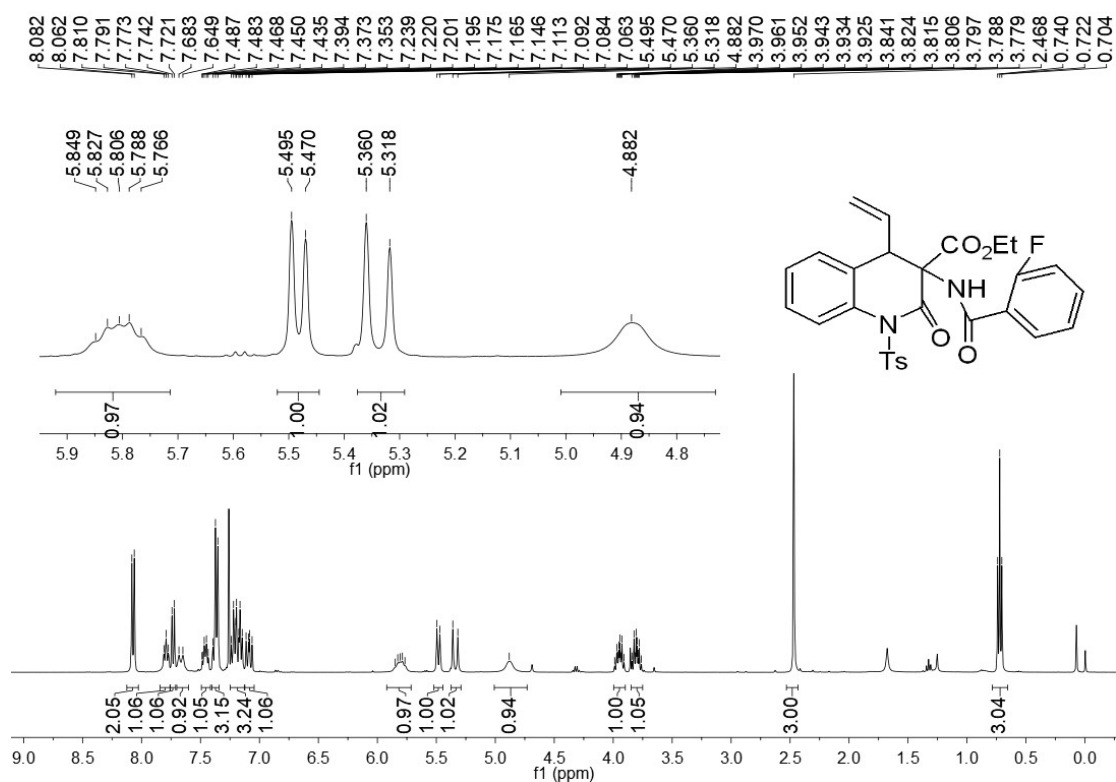

$^{13}\text{C}$  NMR (100 MHz,  $\text{CDCl}_3$ ) of compound **3ac**: inseparable diastereomers (dr = 95:5)

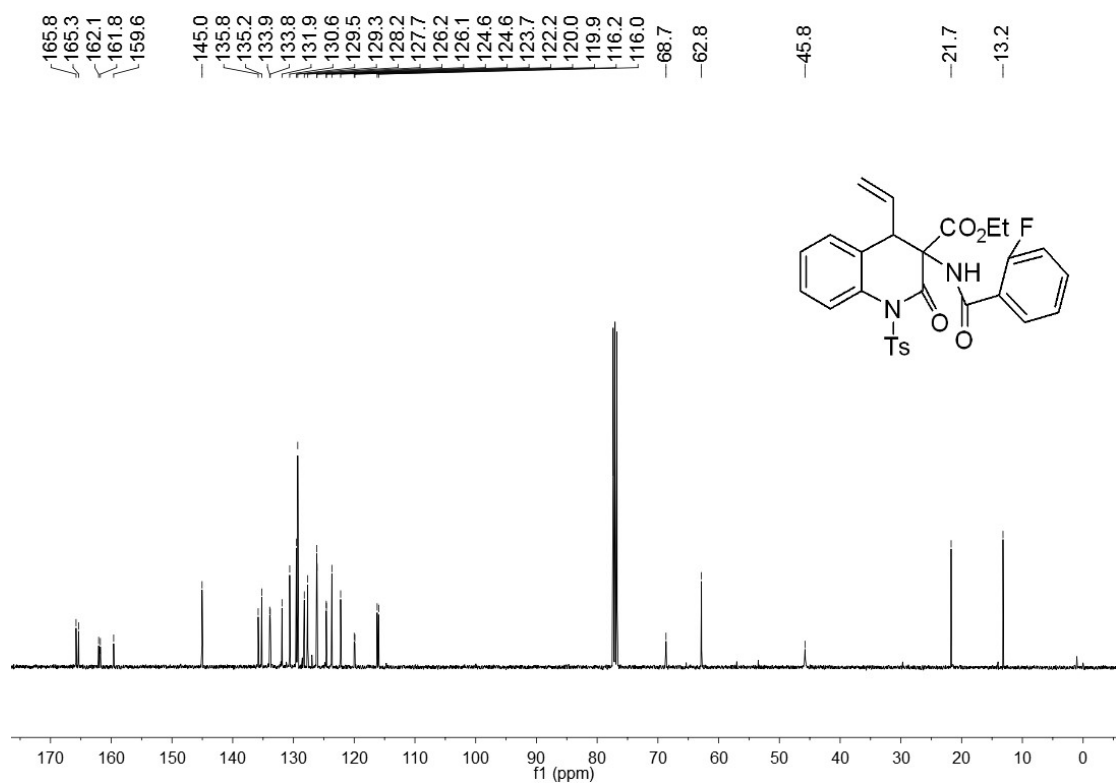



$^1\text{H}$  NMR (400 MHz,  $\text{CDCl}_3$ ) of compound **3ad**: inseparable diastereomers (dr=88:12)

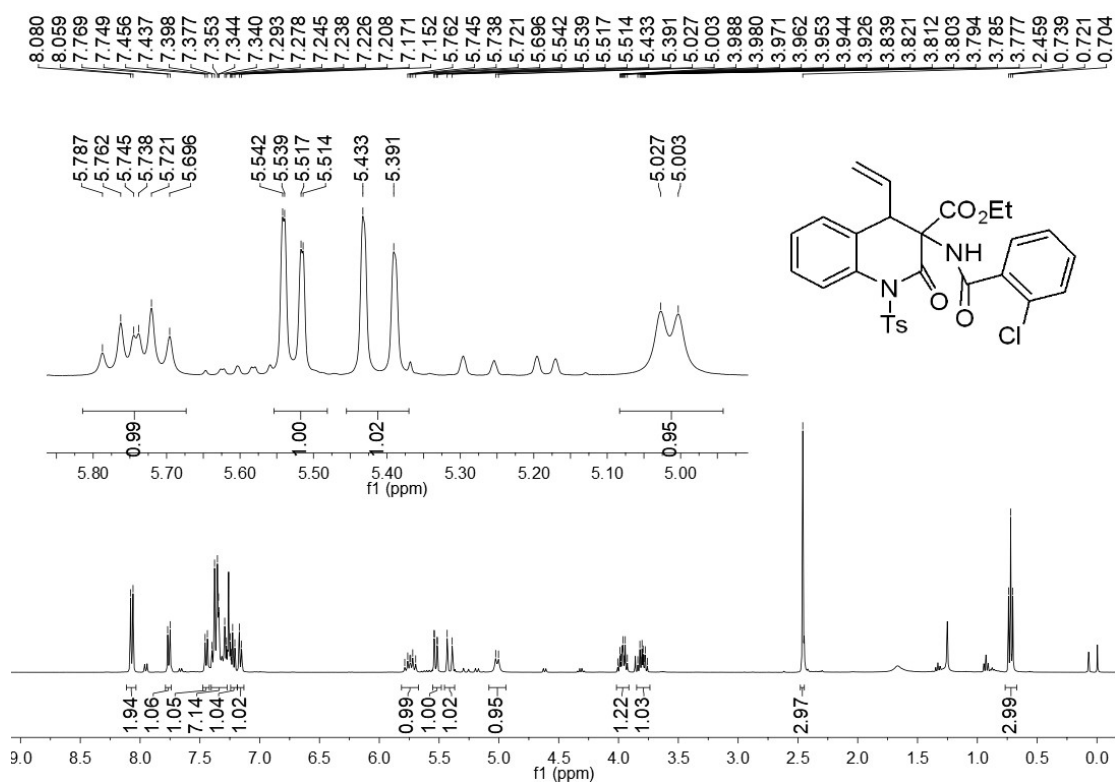

$^{13}\text{C}$  NMR (100 MHz,  $\text{CDCl}_3$ ) of compound **3ad**: inseparable diastereomers (dr= 88:12)

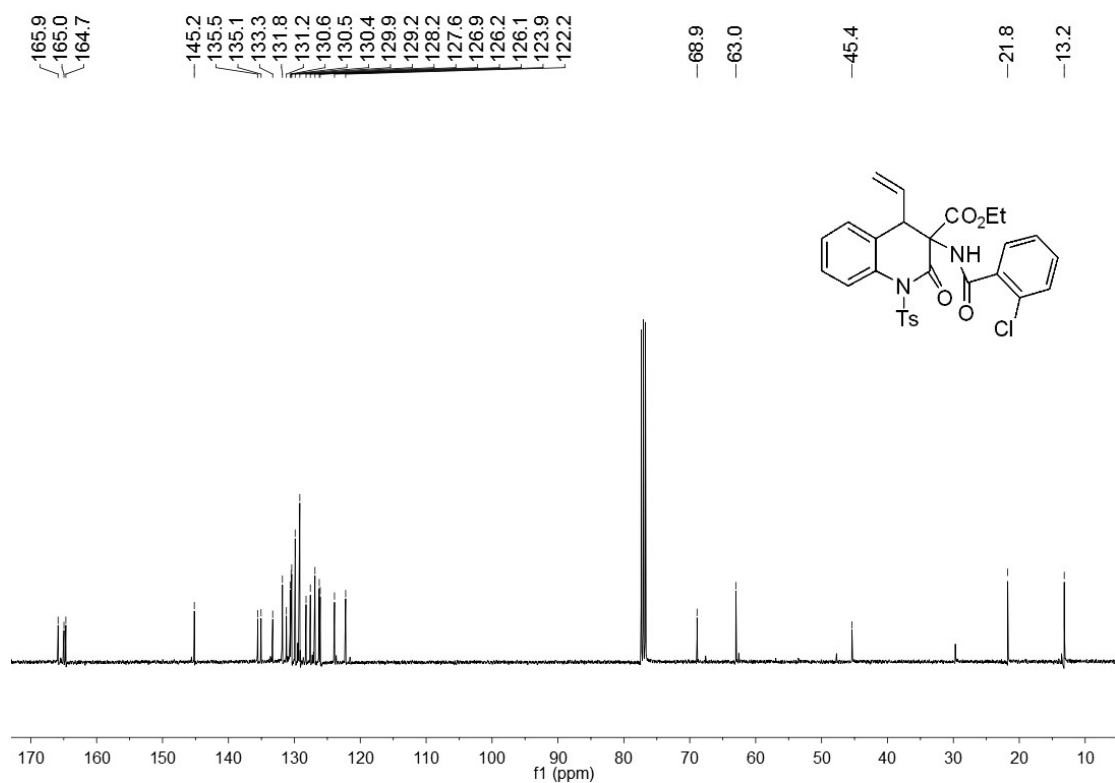

$^1\text{H}$  NMR (400 MHz,  $\text{CDCl}_3$ ) of compound **3ae**: inseparable diastereomers (dr = 95:5)

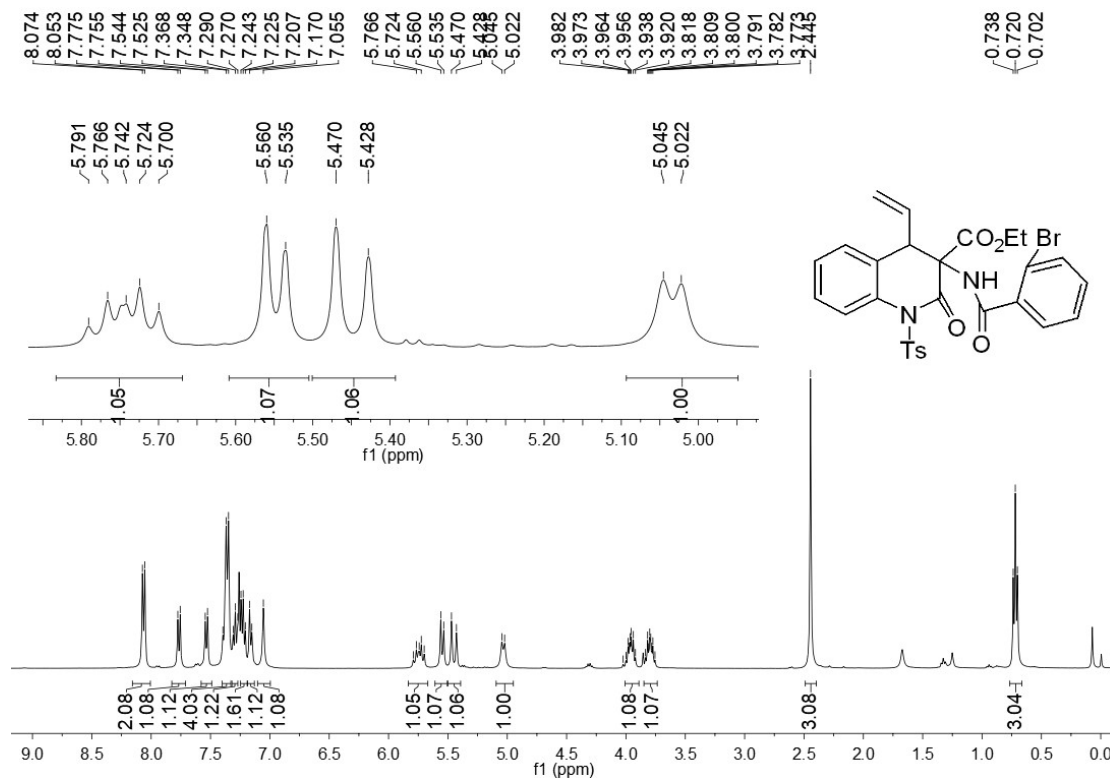

$^{13}\text{C}$  NMR (100 MHz,  $\text{CDCl}_3$ ) of compound **3ae**: inseparable diastereomers (dr = 95:5)

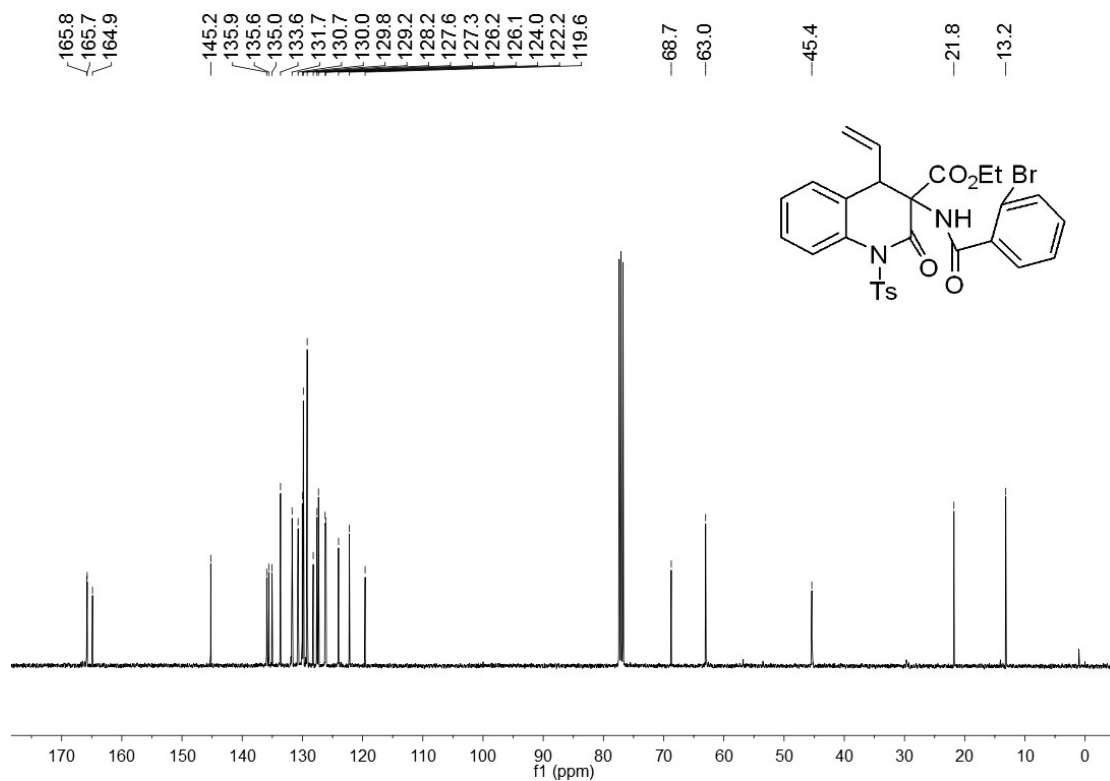

$^1\text{H}$  NMR (400 MHz,  $\text{CDCl}_3$ ) of compound **3af**: inseparable diastereomers (dr > 95:5)

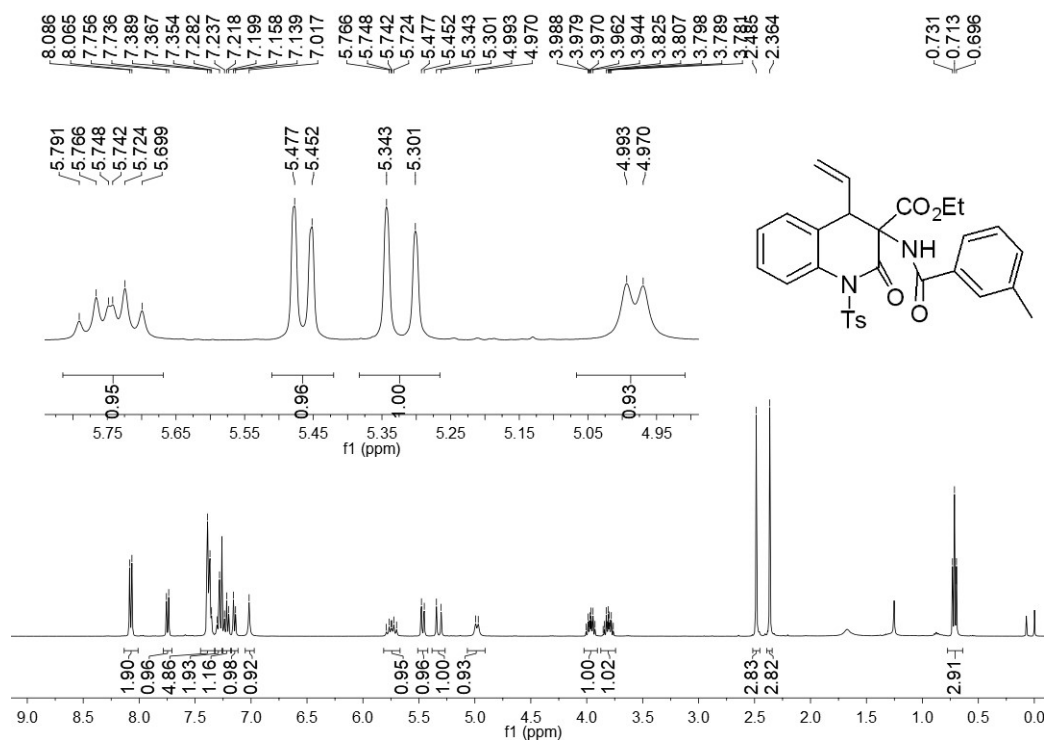

$^{13}\text{C}$  NMR (100 MHz,  $\text{CDCl}_3$ ) of compound **3af**: inseparable diastereomers (dr > 95:5)

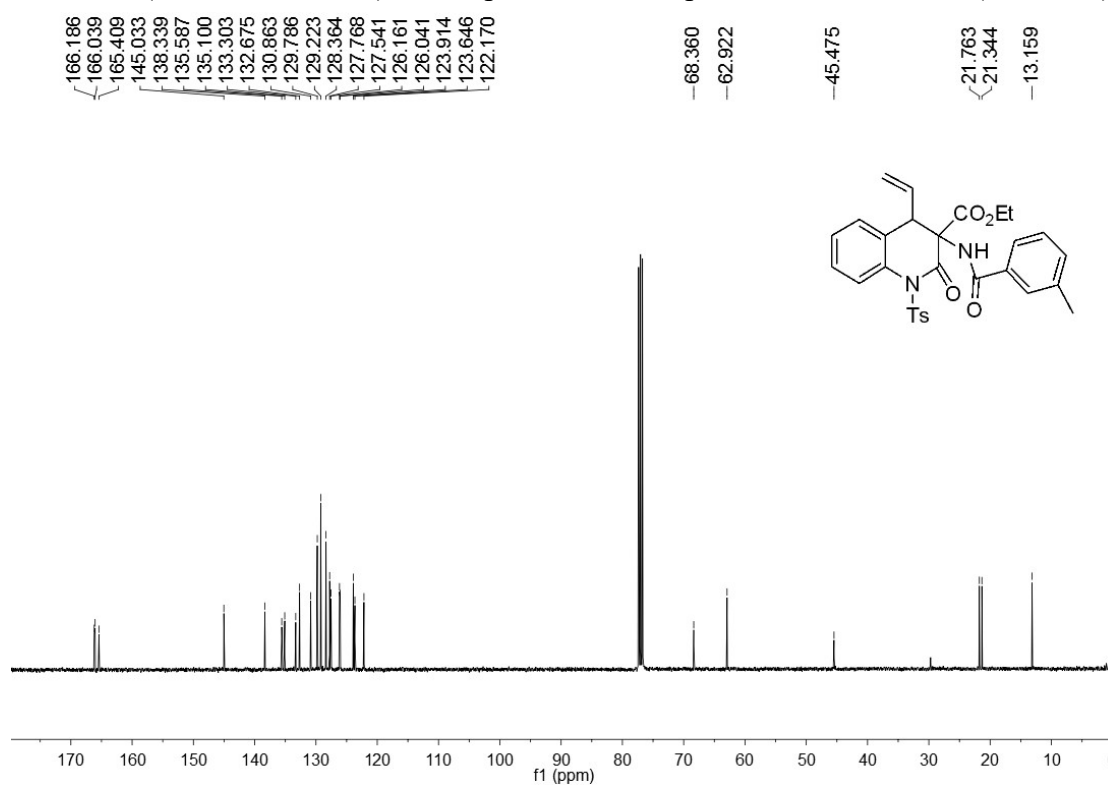

$^1\text{H}$  NMR (400 MHz,  $\text{CDCl}_3$ ) of compound **3ag**: inseparable diastereomers (dr = 95:5)

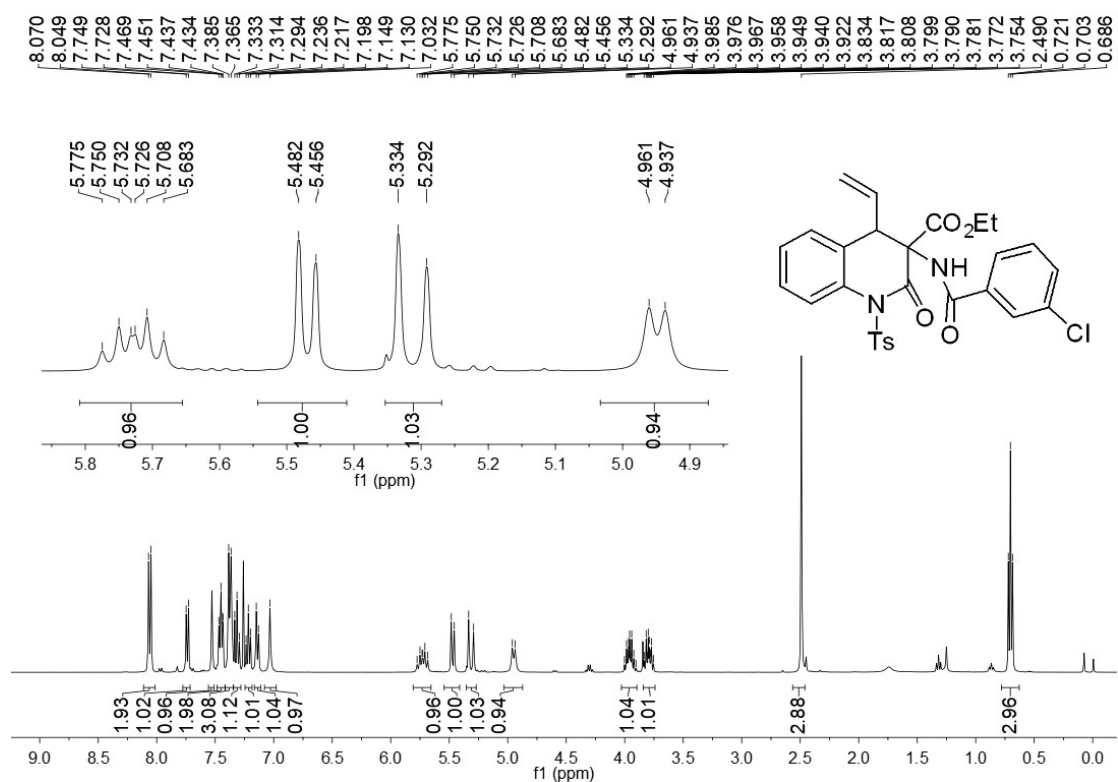

$^{13}\text{C}$  NMR (100 MHz,  $\text{CDCl}_3$ ) of compound **3ag**: inseparable diastereomers (dr = 95:5)

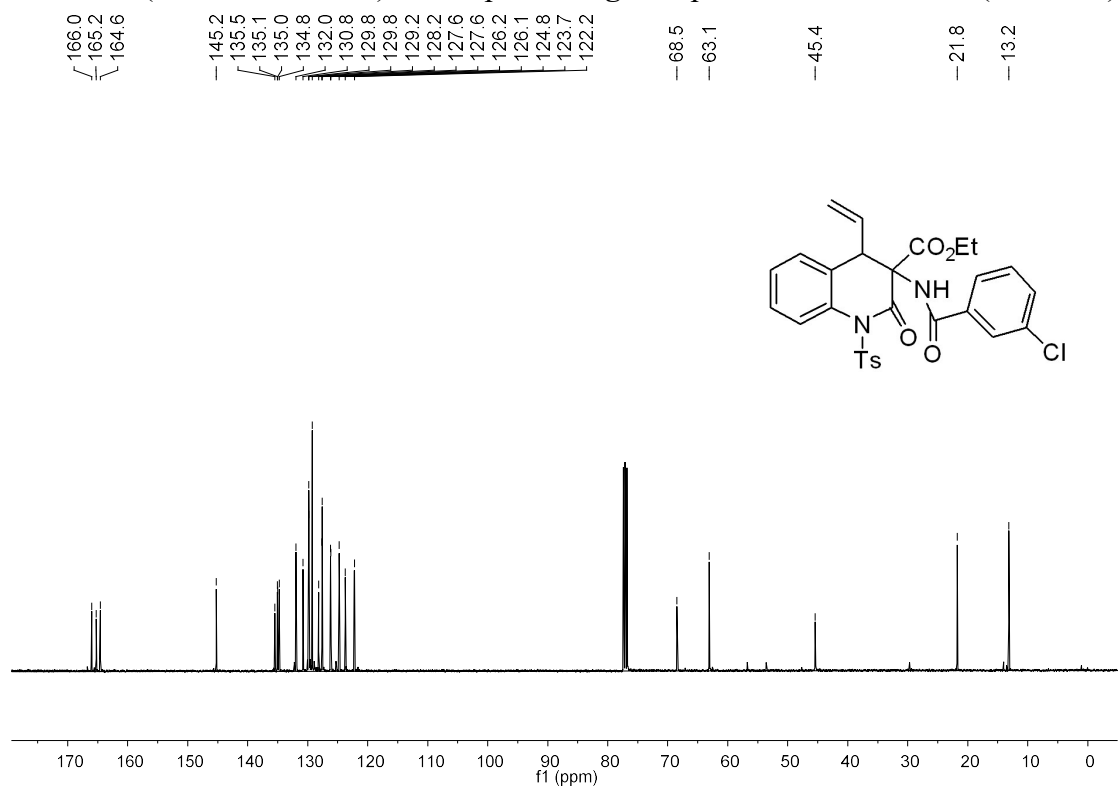

$^1\text{H}$  NMR (400 MHz,  $\text{CDCl}_3$ ) of compound **3ah**: inseparable diastereomers (dr = 95:5)

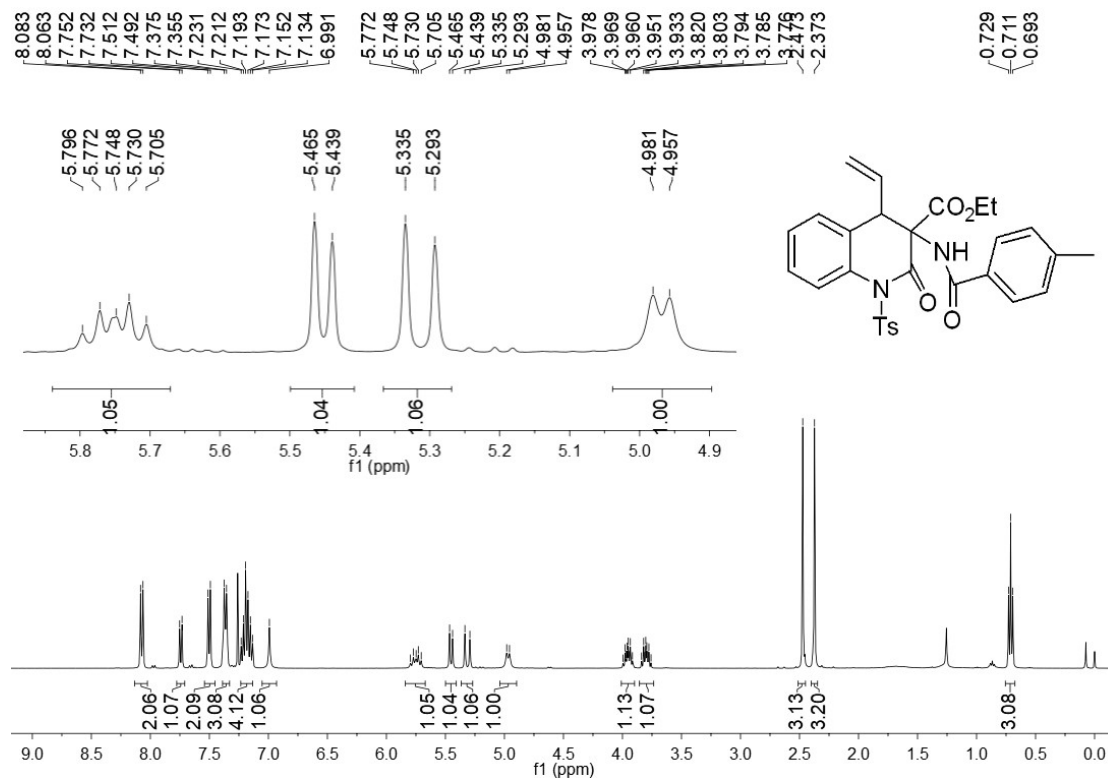

$^{13}\text{C}$  NMR (100 MHz,  $\text{CDCl}_3$ ) of compound **3ah**: inseparable diastereomers (dr= 95:5)

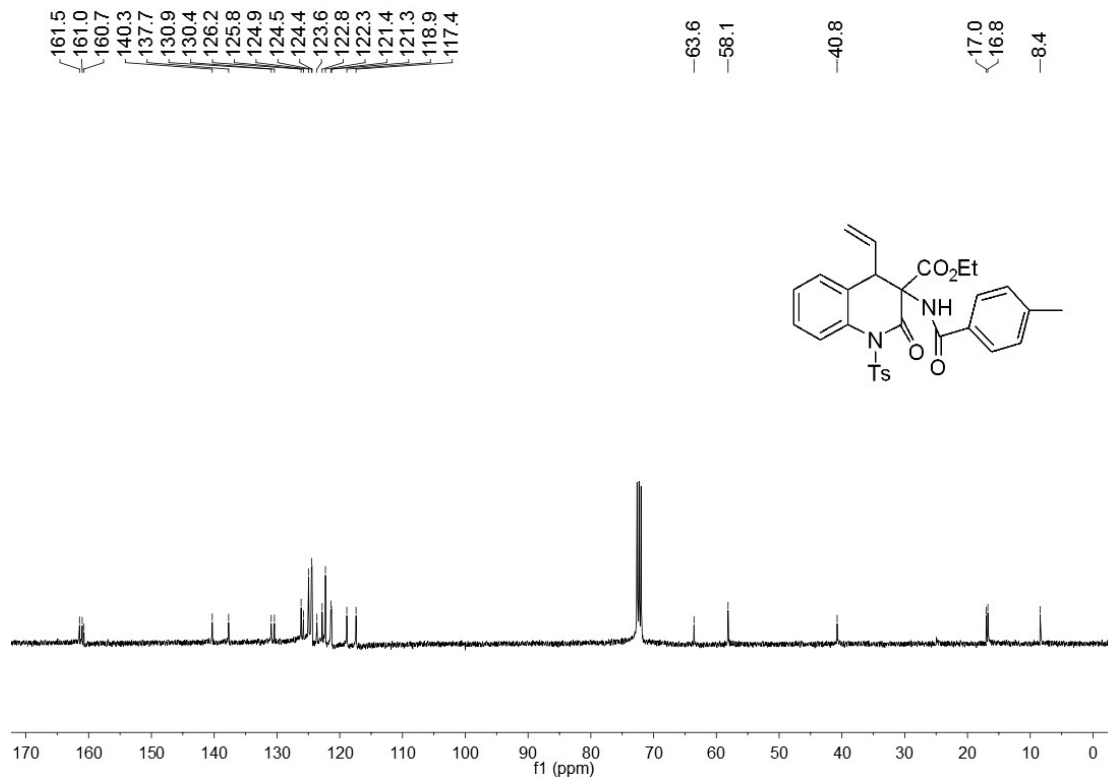

$^1\text{H}$  NMR (400 MHz,  $\text{CDCl}_3$ ) of compound **3ai**: inseparable diastereomers (dr = 92:8)

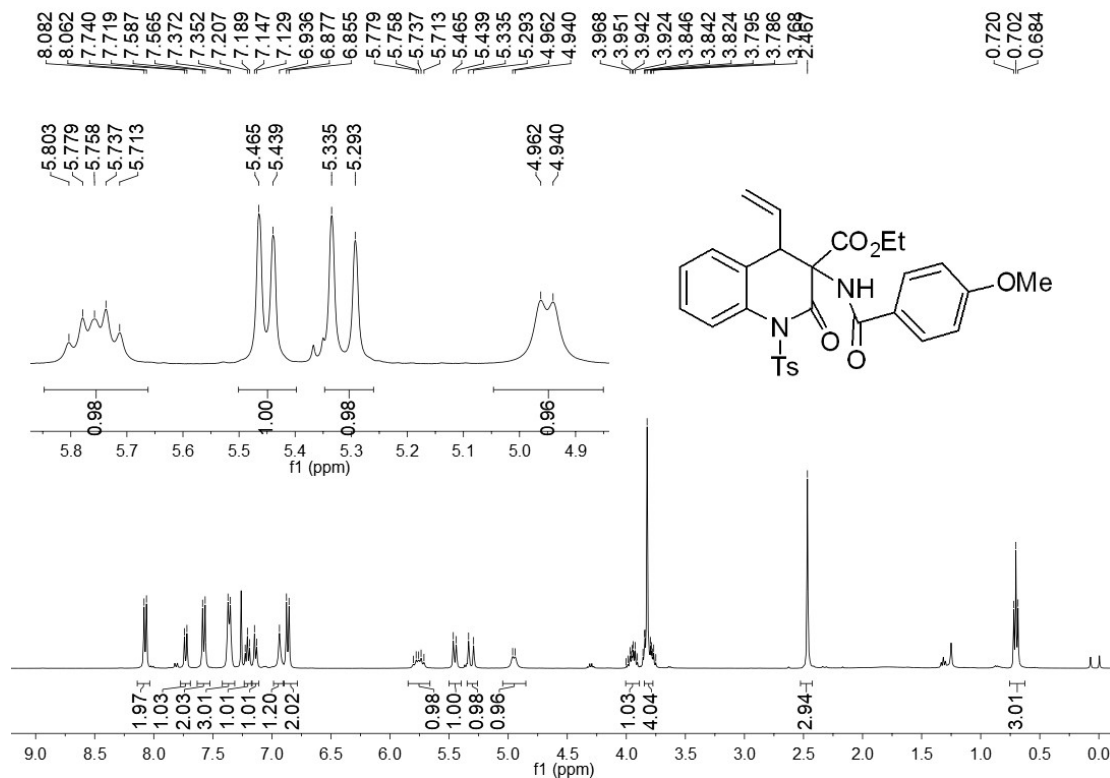

$^{13}\text{C}$  NMR (100 MHz,  $\text{CDCl}_3$ ) of compound **3ai**: inseparable diastereomers (dr = 92:8)

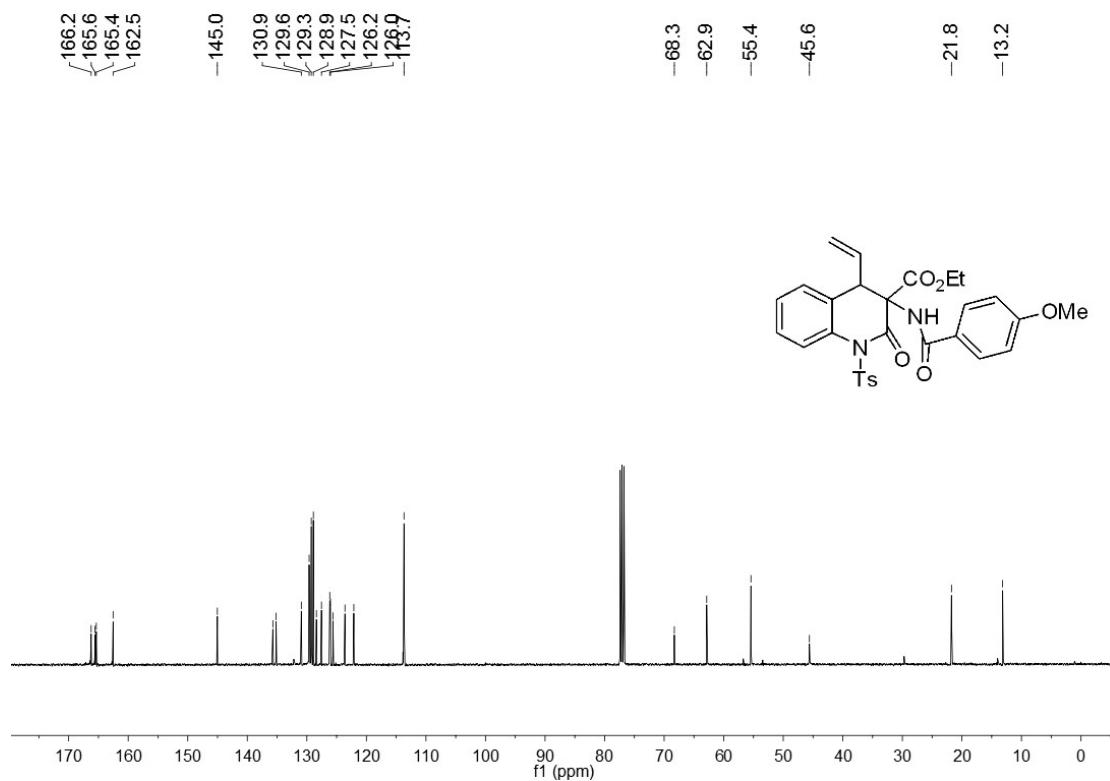

$^1\text{H}$  NMR (400 MHz,  $\text{CDCl}_3$ ) of compound **3aj**: inseparable diastereomers (dr = 91:9)

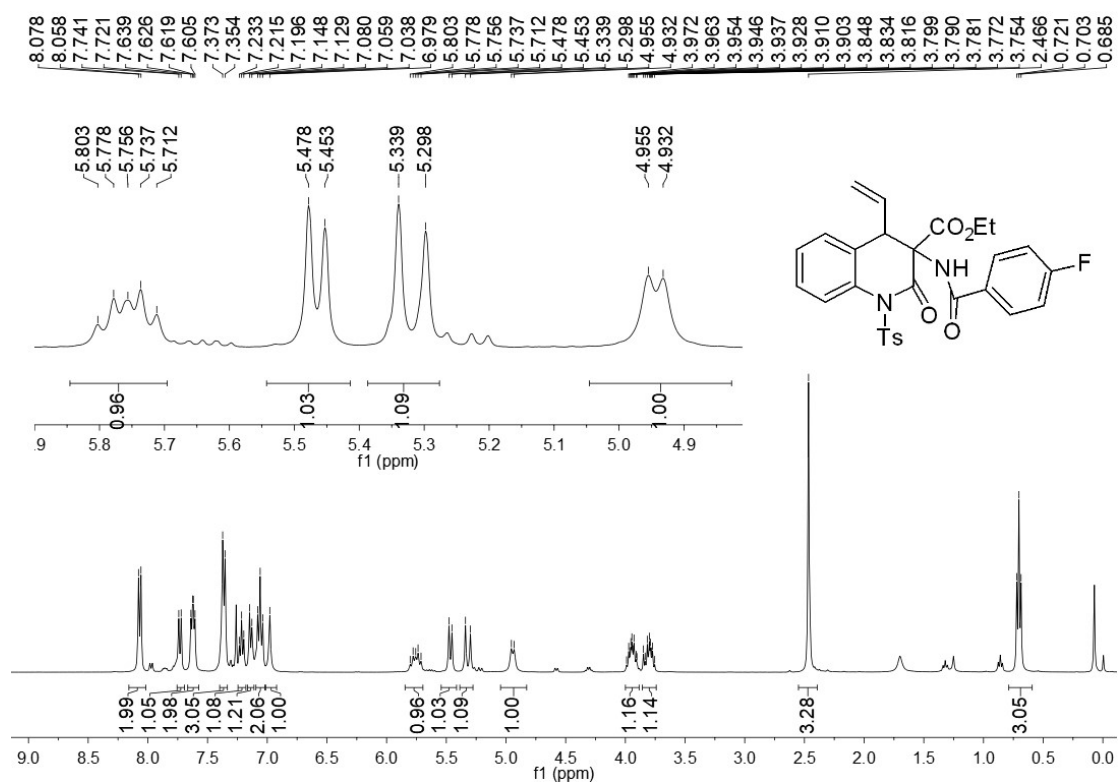

$^{13}\text{C}$  NMR (100 MHz,  $\text{CDCl}_3$ ) of compound **3aj**: inseparable diastereomers (dr = 91:9)

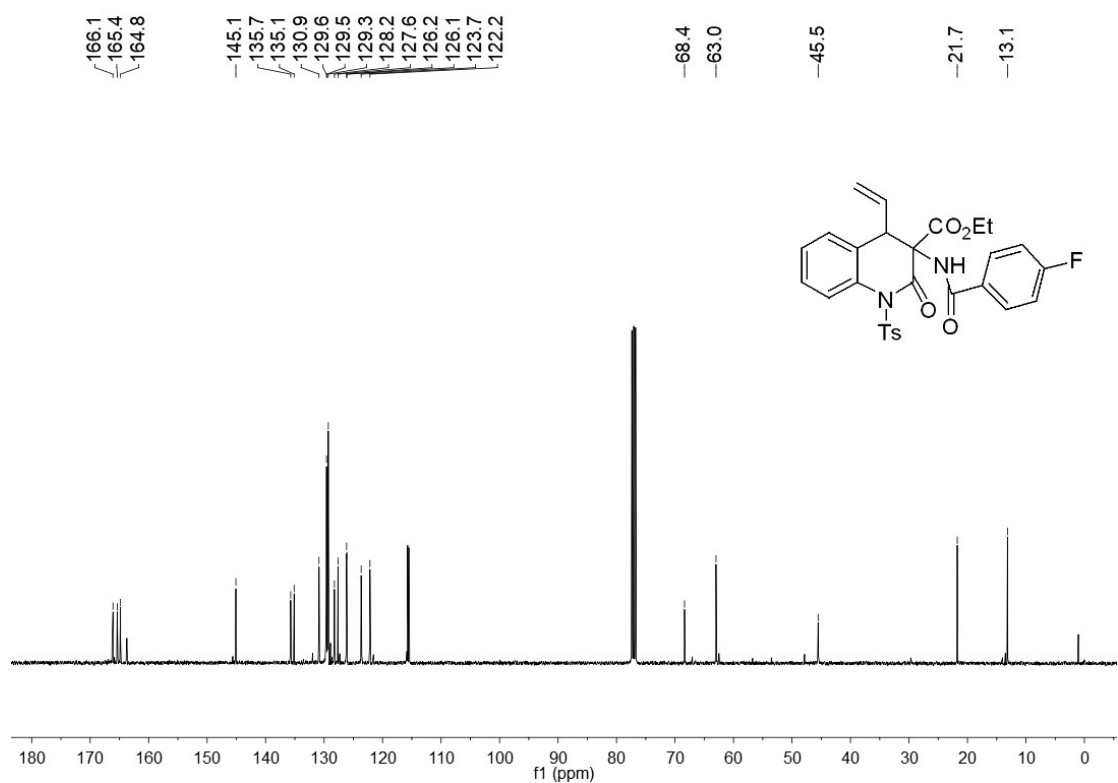

$^1\text{H}$  NMR (400 MHz,  $\text{CDCl}_3$ ) of compound **3ak**: inseparable diastereomers (dr = 95:5)

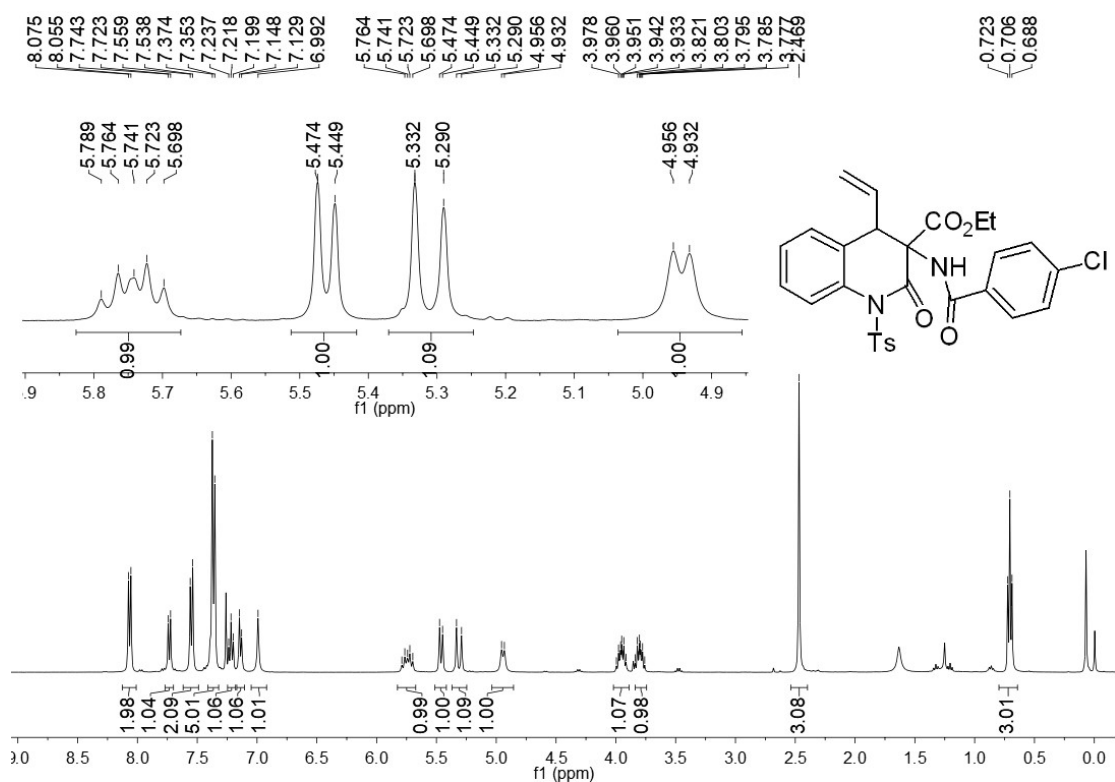

$^{13}\text{C}$  NMR (100 MHz,  $\text{CDCl}_3$ ) of compound **3ak**: inseparable diastereomers (dr= 95:5)

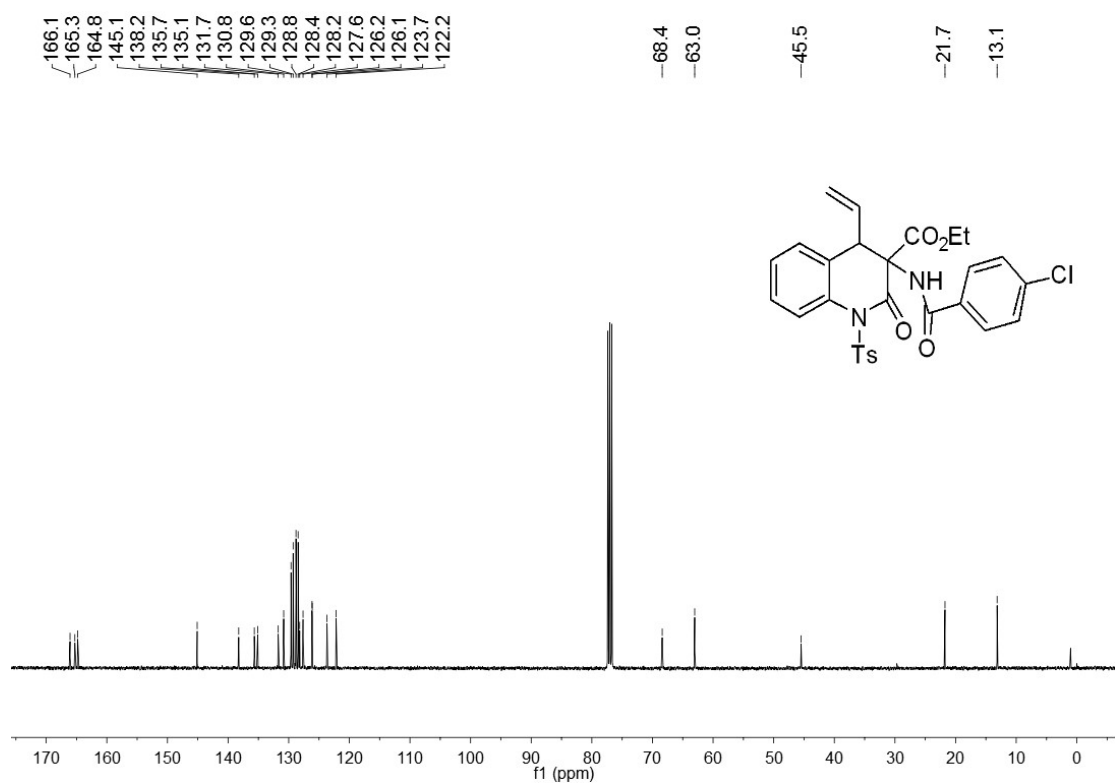



$^1\text{H}$  NMR (400 MHz,  $\text{CDCl}_3$ ) of compound **3al**: inseparable diastereomers (dr = 95:5)

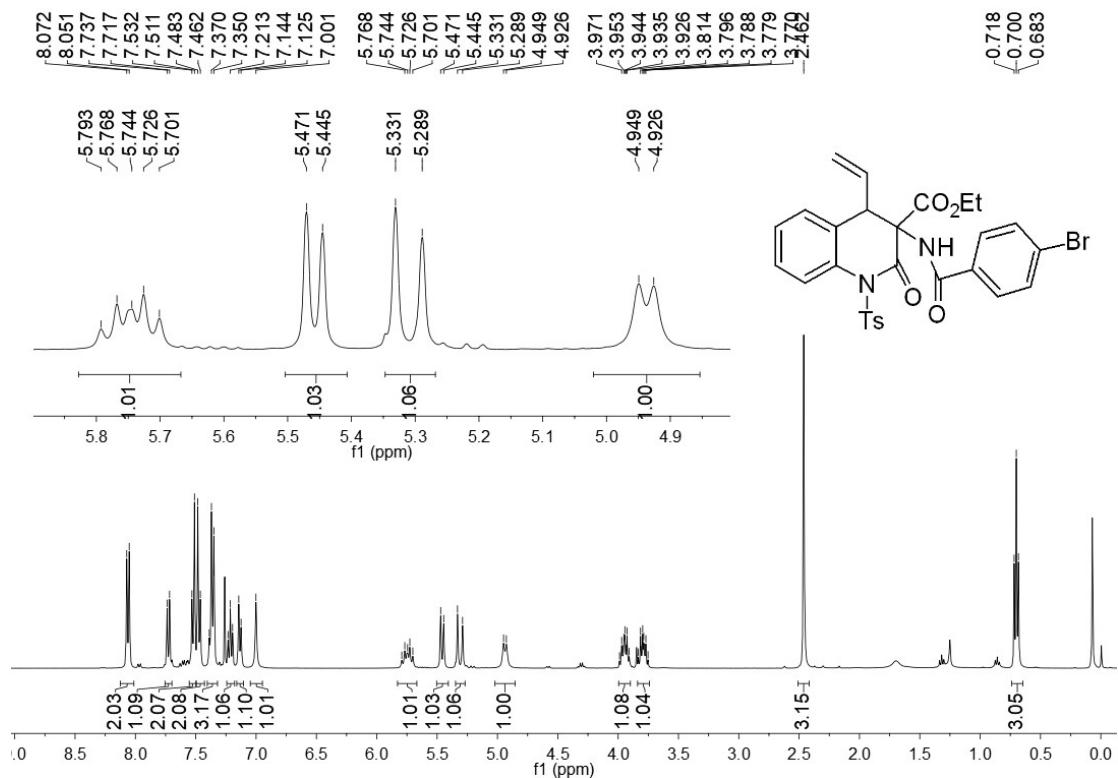

$^{13}\text{C}$  NMR (100 MHz,  $\text{CDCl}_3$ ) of compound **3al**: inseparable diastereomers (dr = 95:5)

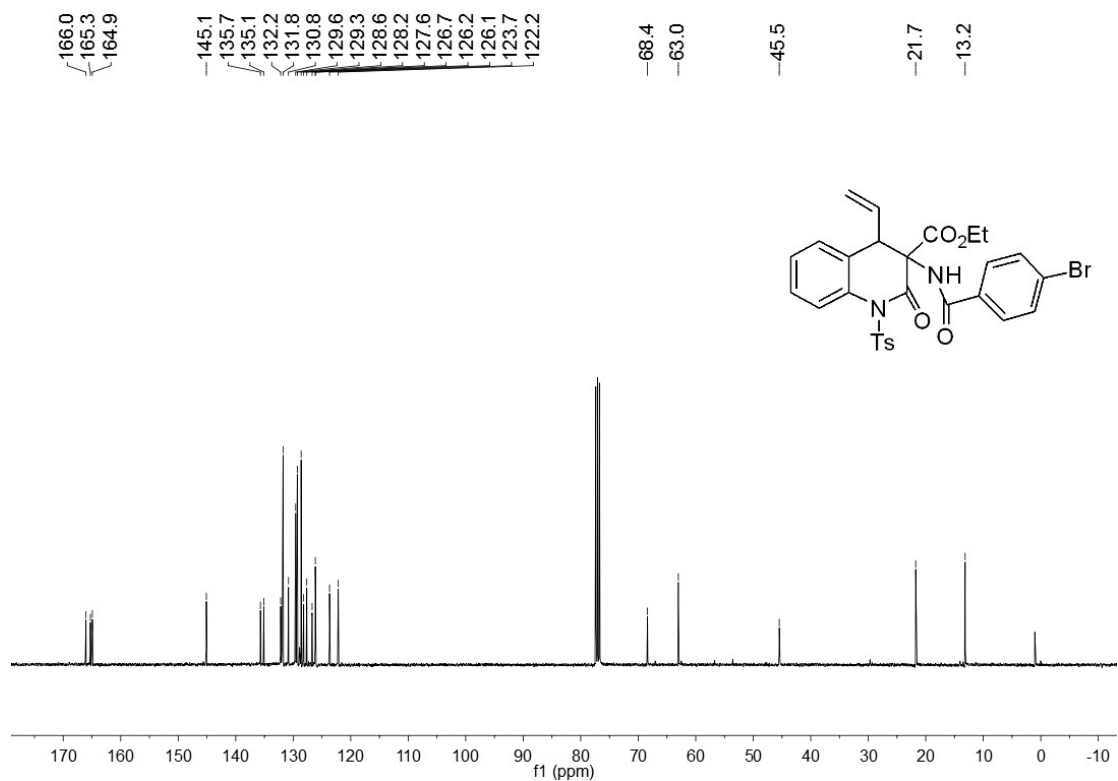

$^1\text{H}$  NMR (400 MHz,  $\text{CDCl}_3$ ) of compound **3am**: inseparable diastereomers (dr = 94:6)

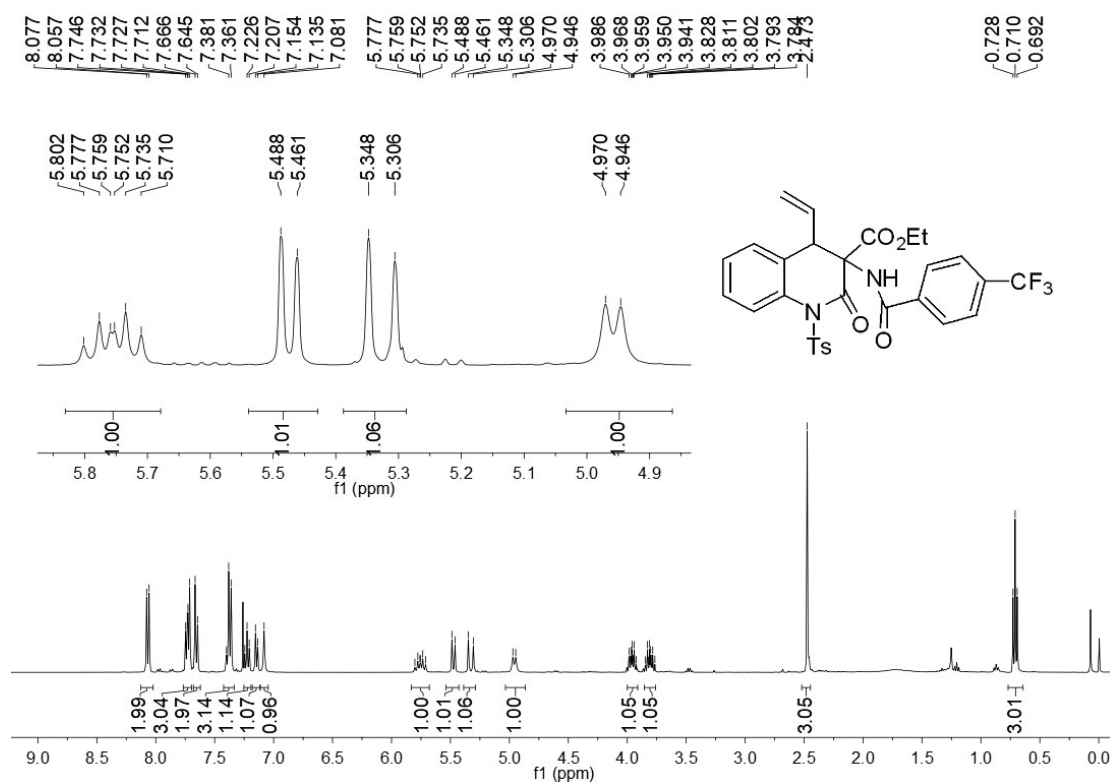

$^{13}\text{C}$  NMR (100 MHz,  $\text{CDCl}_3$ ) of compound **3am**: inseparable diastereomers (dr = 94:6)

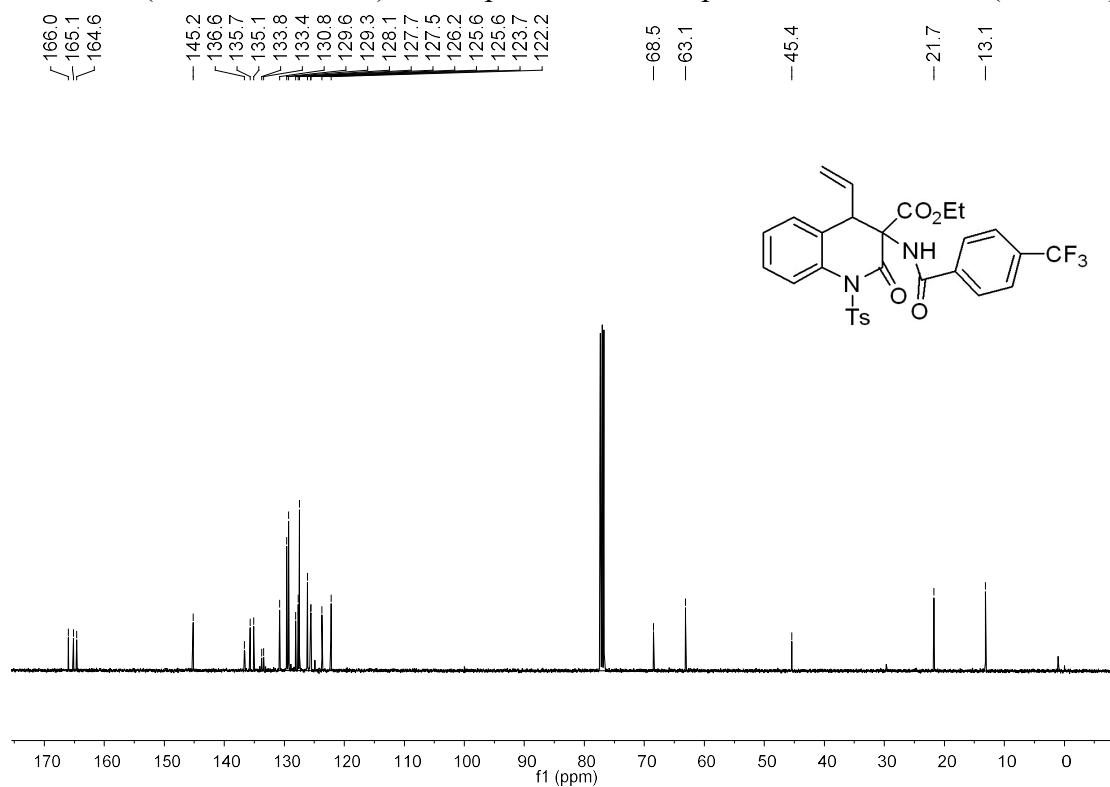

$^1\text{H}$  NMR (400 MHz,  $\text{CDCl}_3$ ) of compound **5aa**:

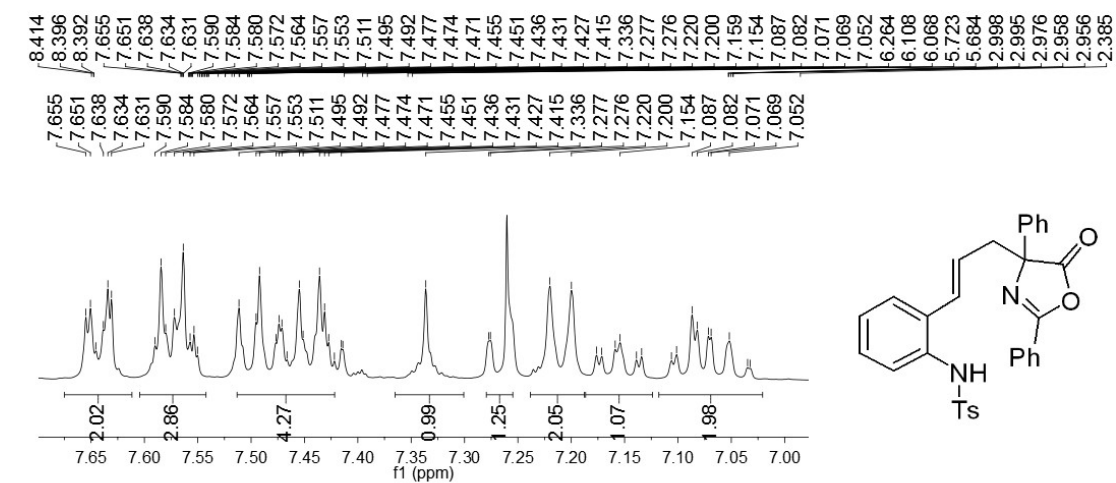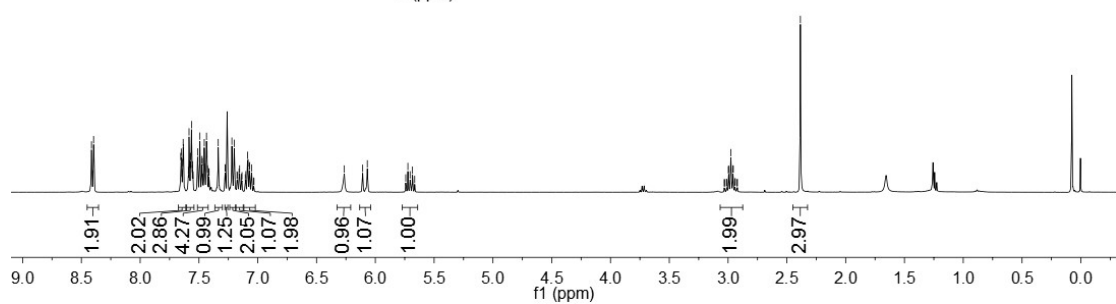

$^{13}\text{C}$  NMR (100 MHz,  $\text{CDCl}_3$ ) of compound **5aa**:

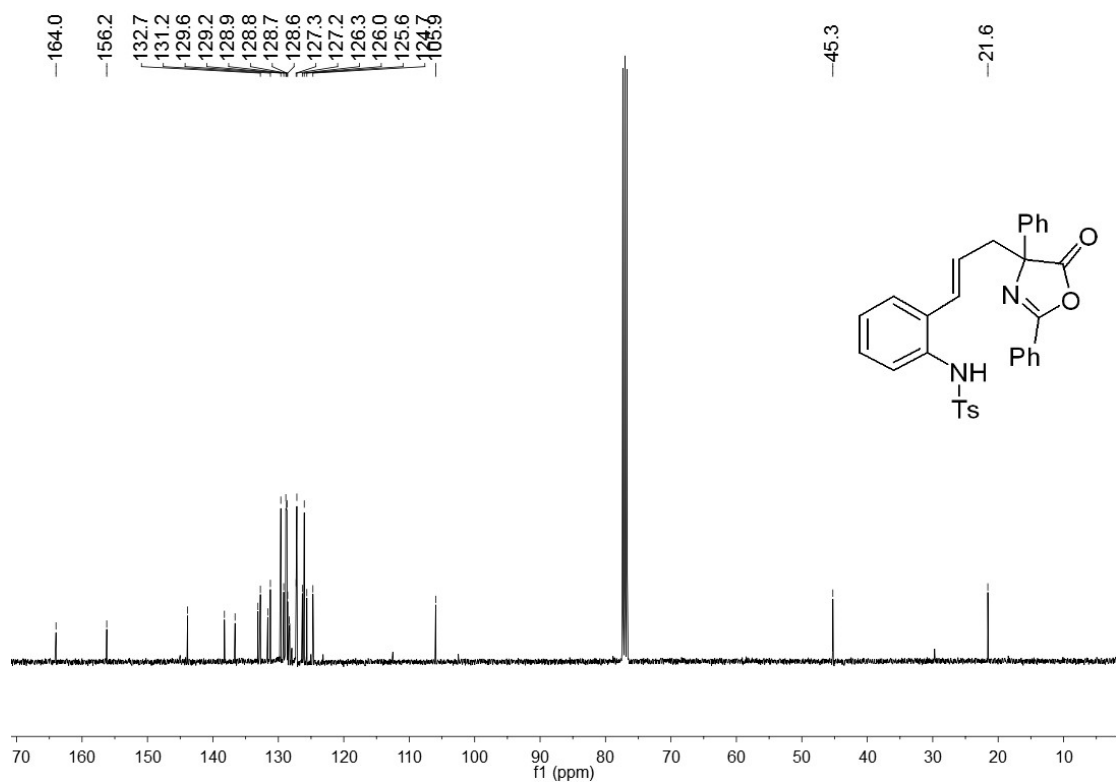

$^1\text{H}$  NMR (400 MHz,  $\text{CDCl}_3$ ) of compound **5ab**:

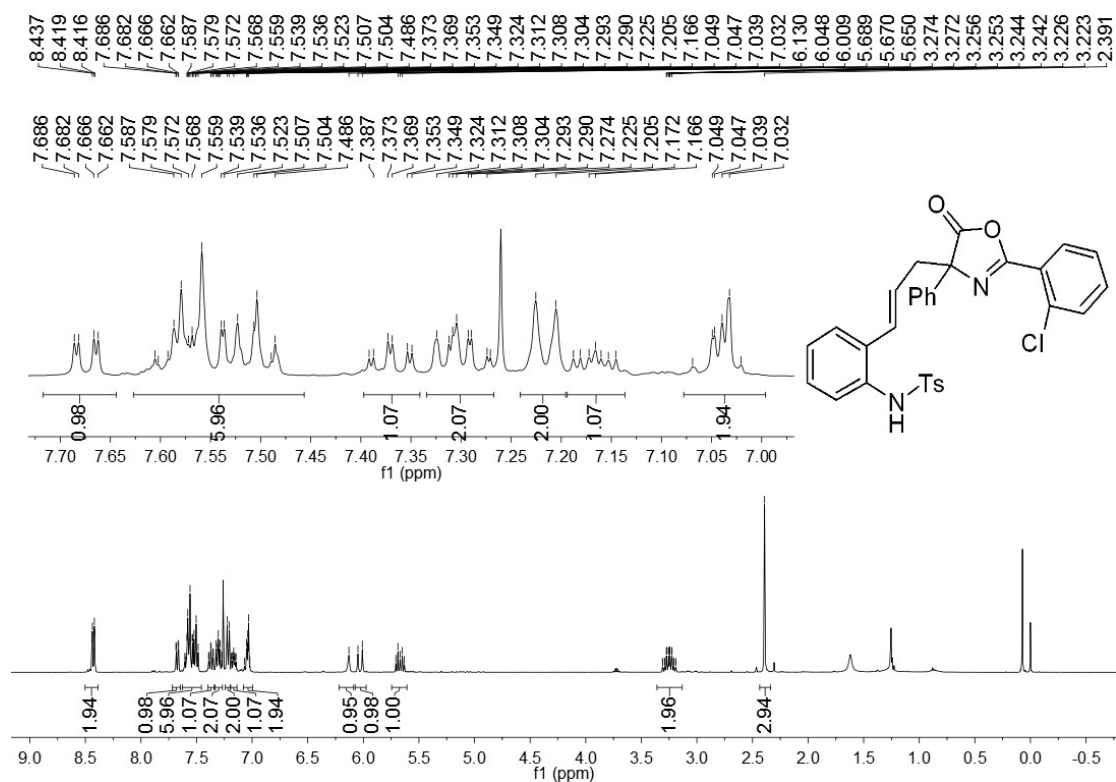

$^{13}\text{C}$  NMR (100 MHz,  $\text{CDCl}_3$ ) of compound **5ab**:

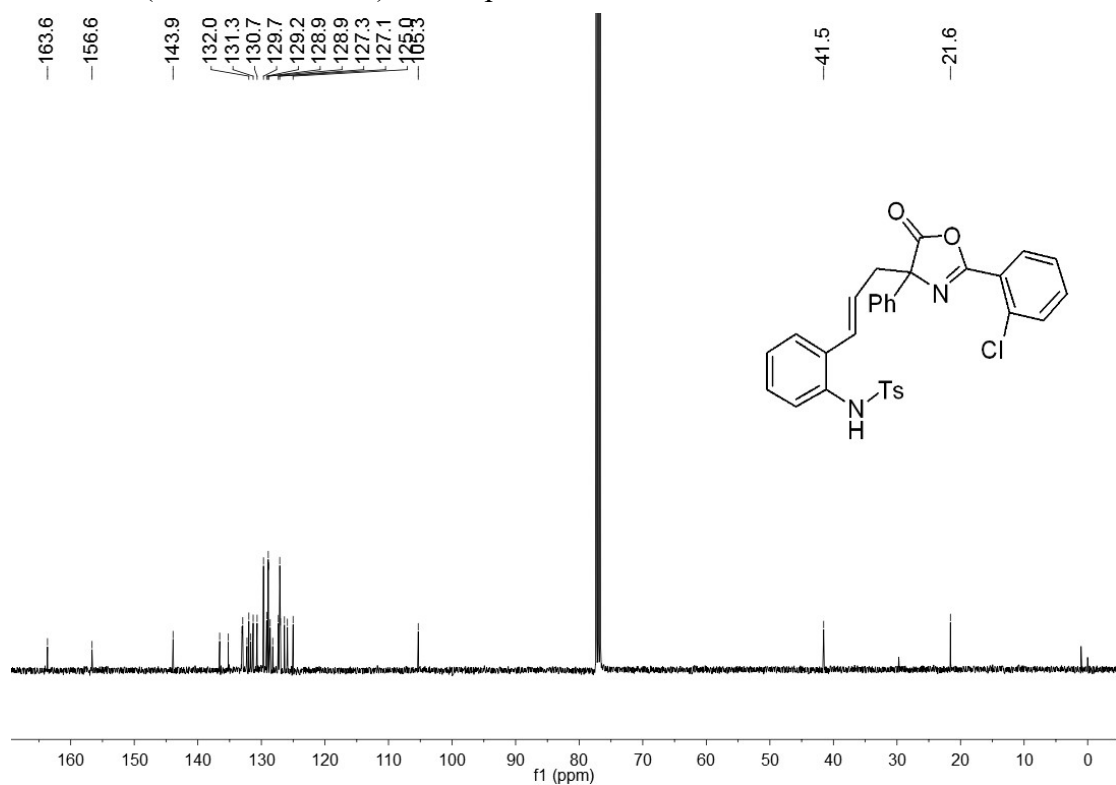

$^1\text{H}$  NMR (400 MHz,  $\text{CDCl}_3$ ) of compound **5ac**:

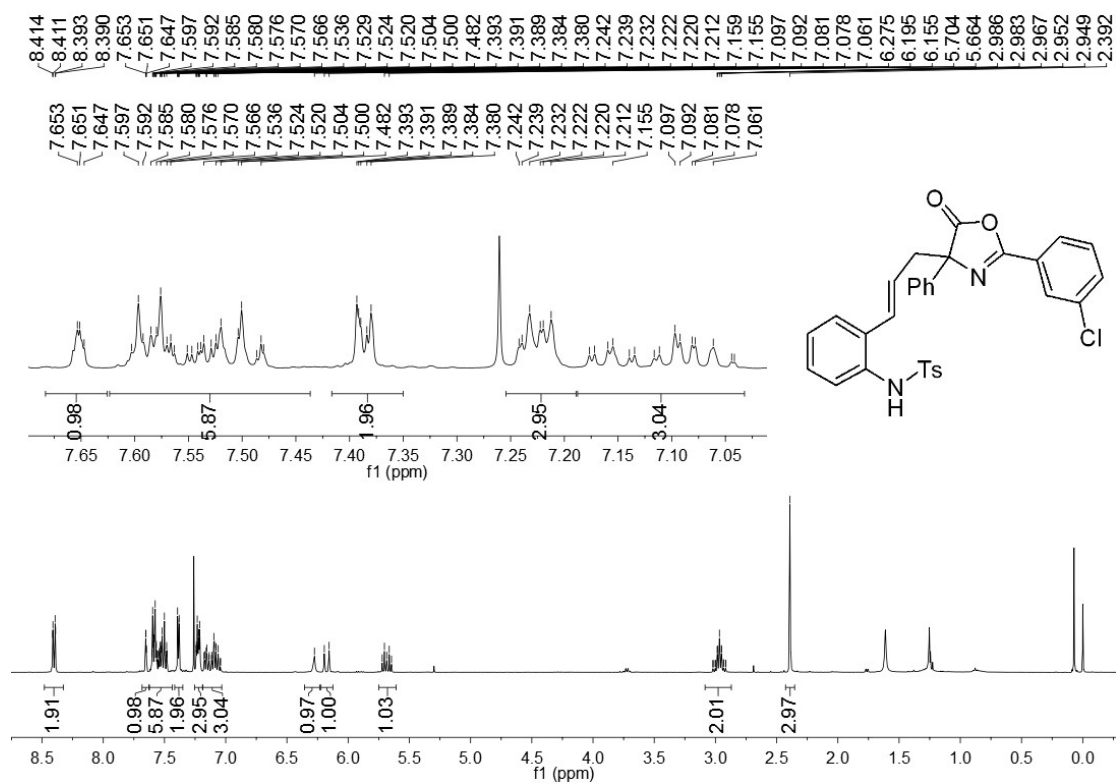

$^{13}\text{C}$  NMR (100 MHz,  $\text{CDCl}_3$ ) of compound **5ac**:

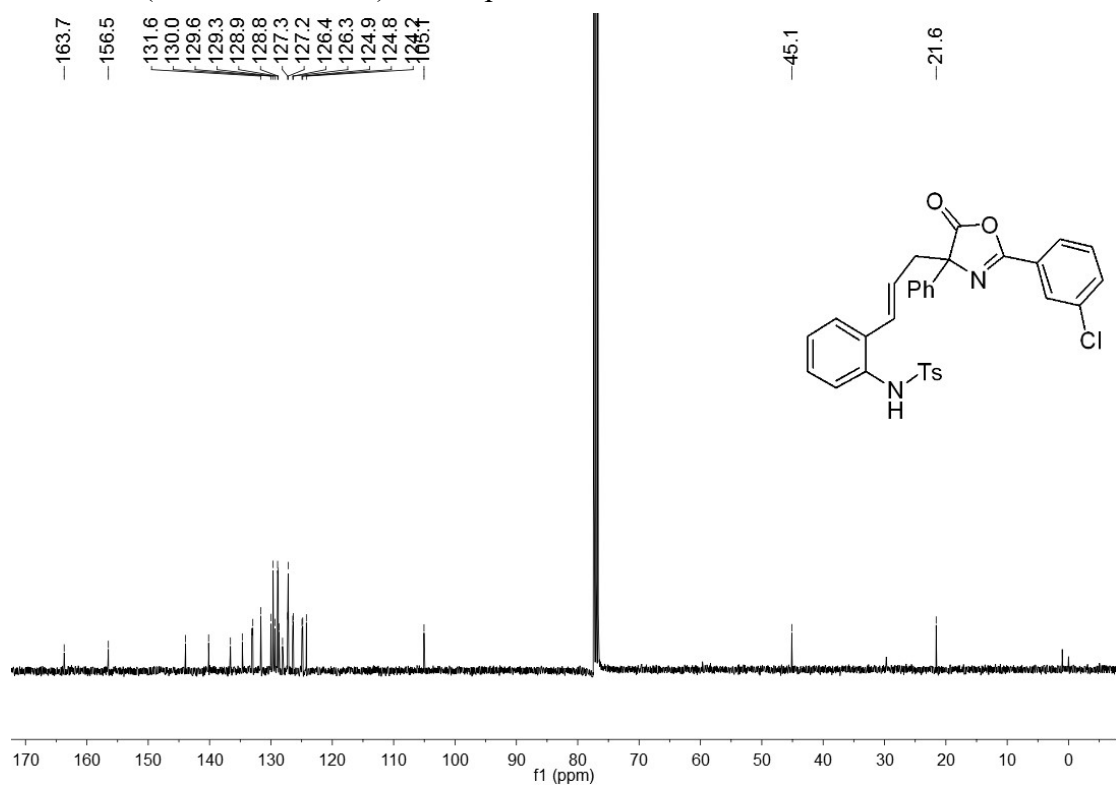

$^1\text{H}$  NMR (400 MHz,  $\text{CDCl}_3$ ) of compound **5ad**:

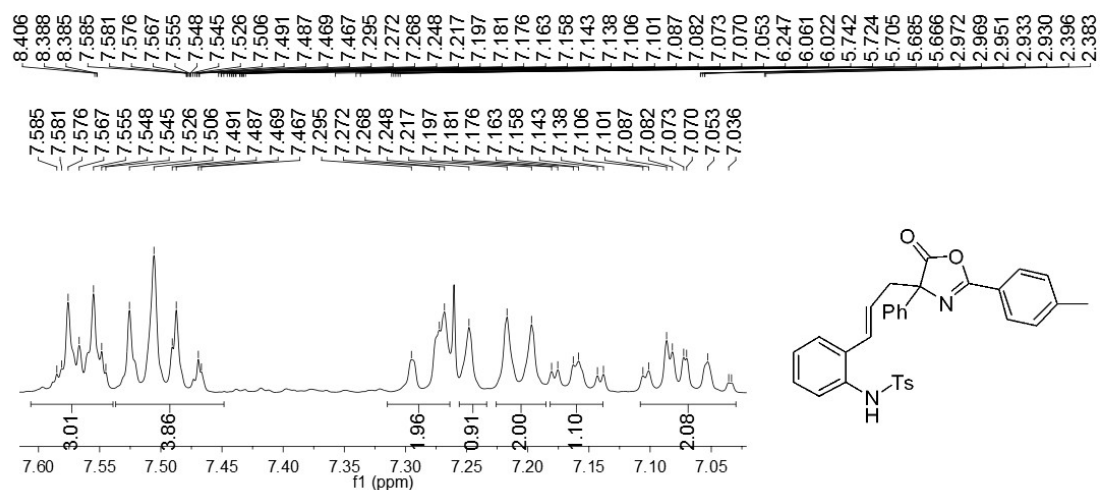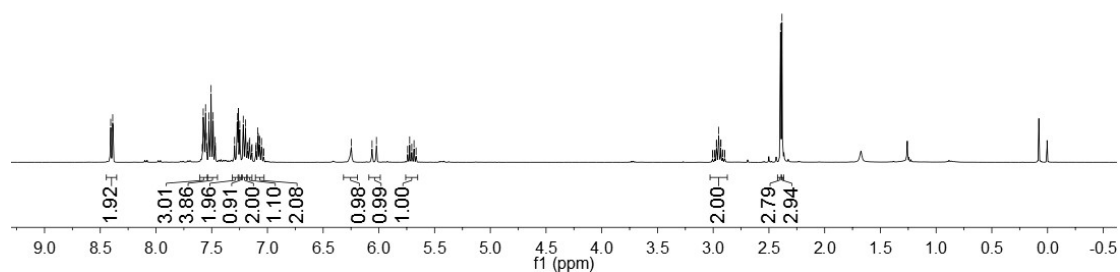

$^{13}\text{C}$  NMR (100 MHz,  $\text{CDCl}_3$ ) of compound **5ad**:

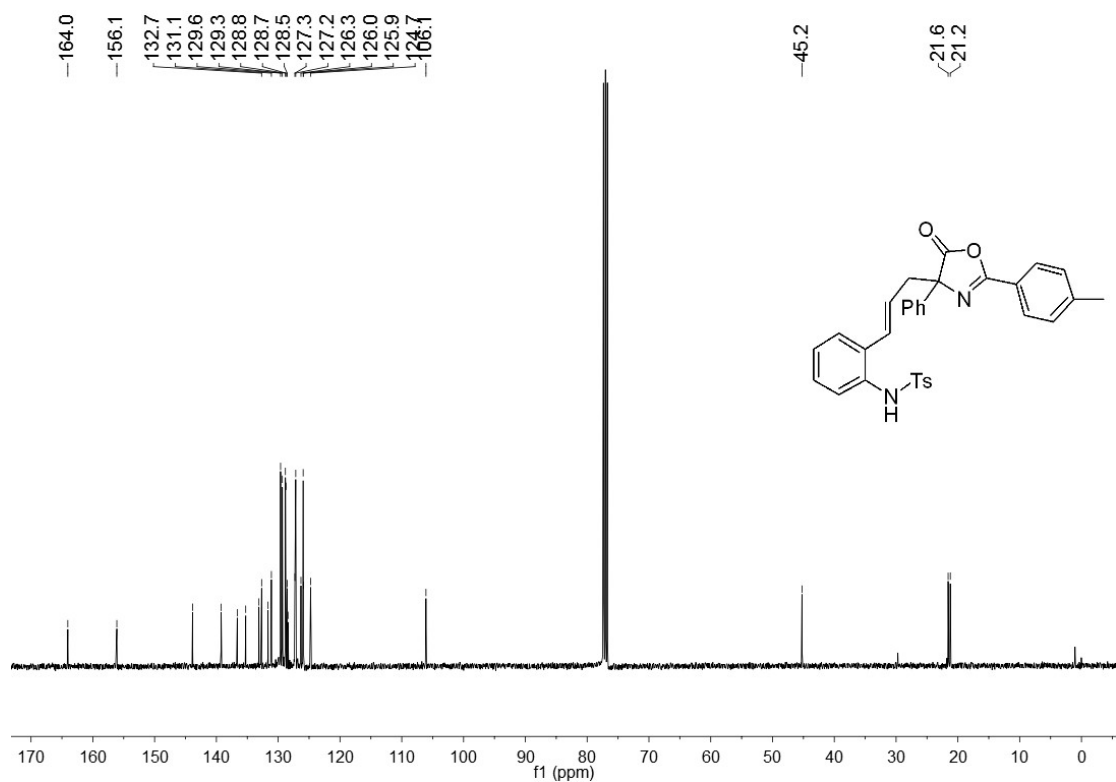

<sup>1</sup>H NMR (400 MHz, CDCl<sub>3</sub>) of compound **5ae**:

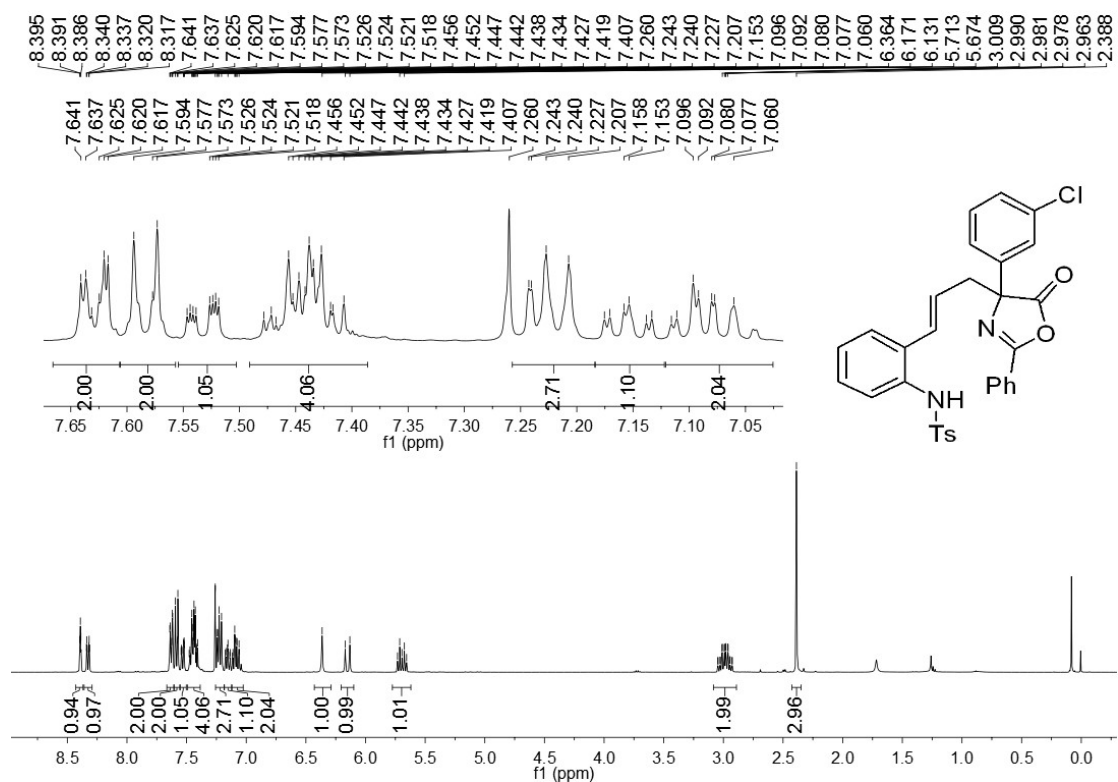

<sup>13</sup>C NMR (100 MHz, CDCl<sub>3</sub>) of compound **5ae**:

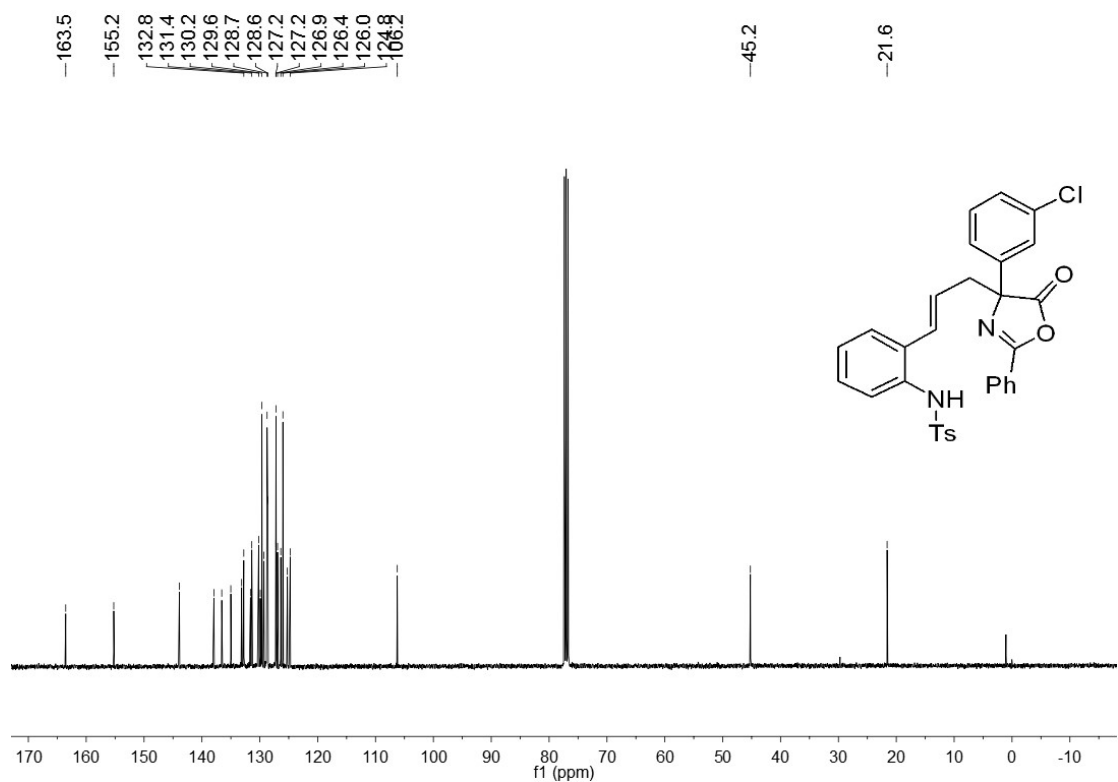

<sup>1</sup>H NMR (400 MHz, CDCl<sub>3</sub>) of compound **5af**:

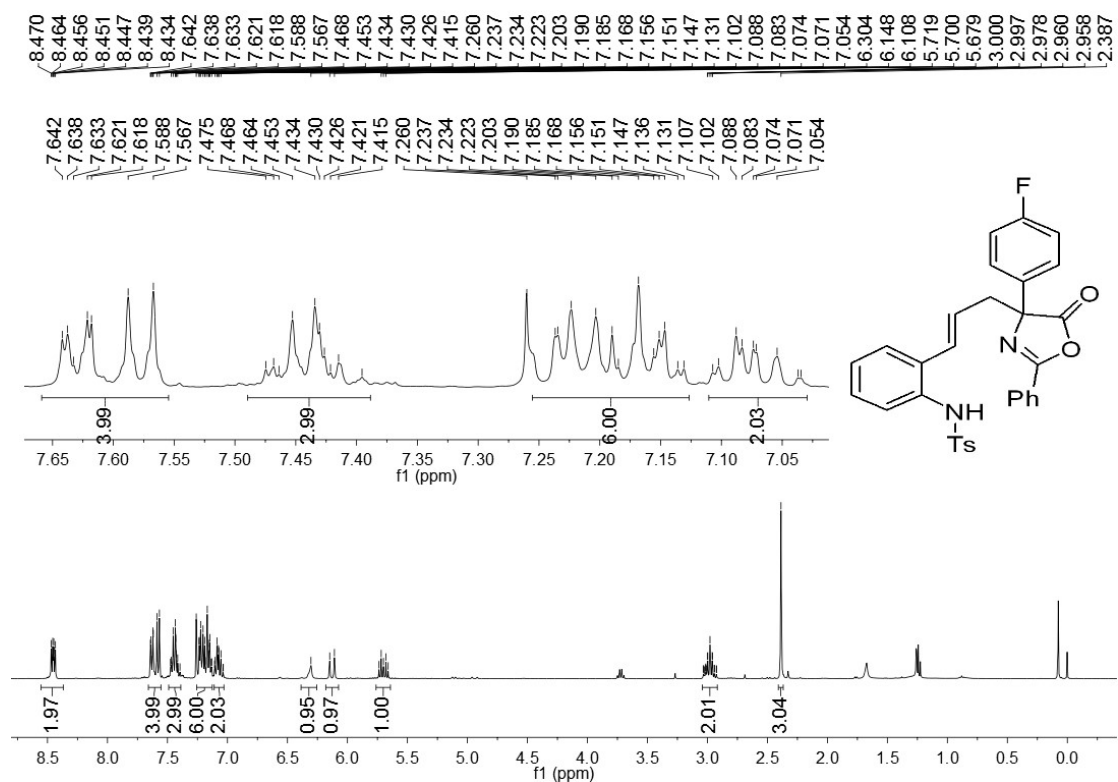

<sup>13</sup>C NMR (100 MHz, CDCl<sub>3</sub>) of compound **5af**:

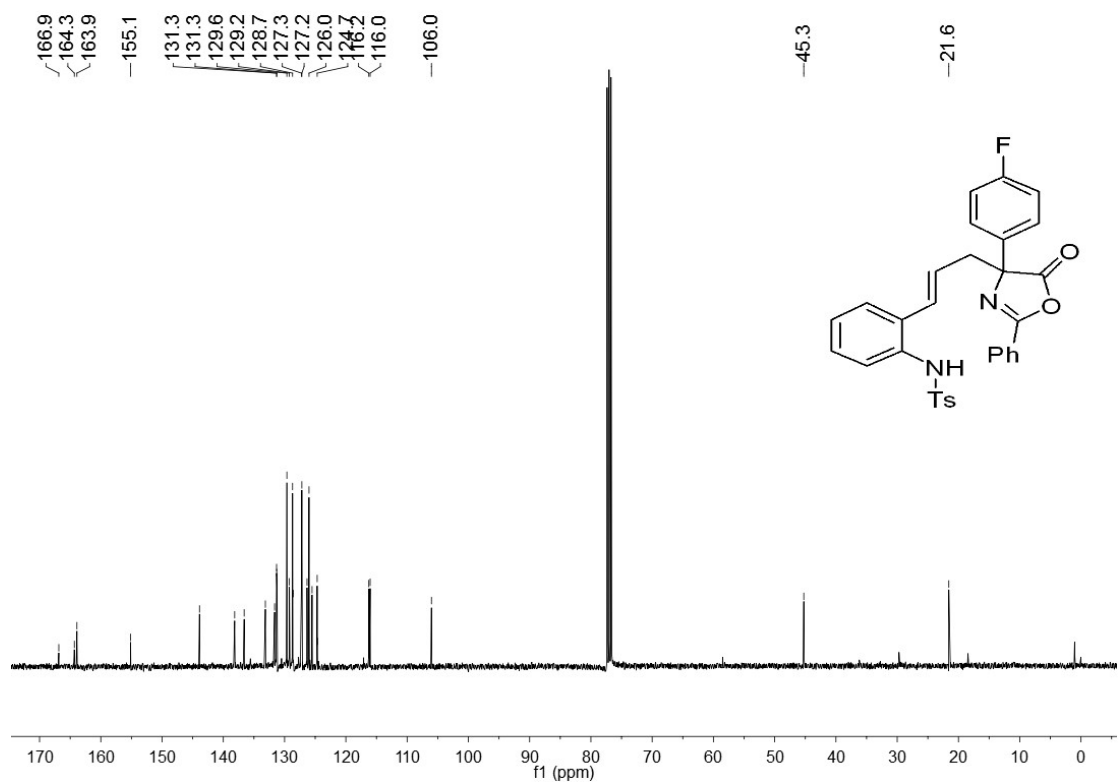



$^1\text{H}$  NMR (400 MHz,  $\text{CDCl}_3$ ) of compound **5da**:

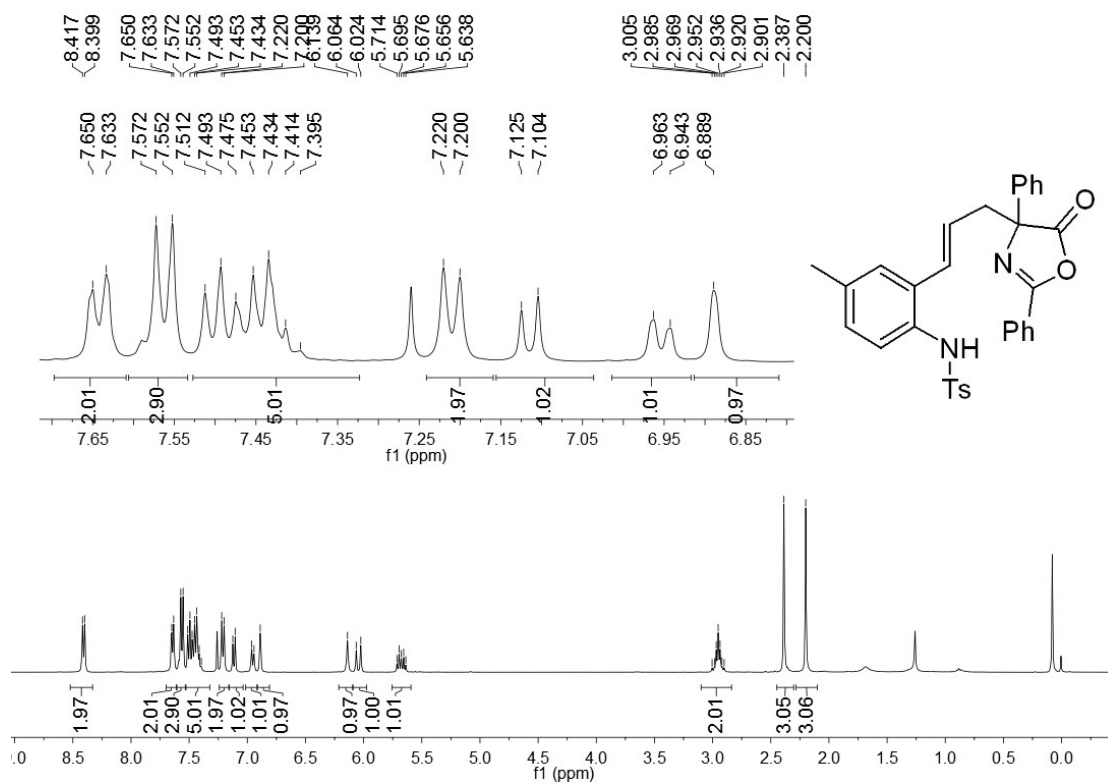

$^{13}\text{C}$  NMR (100 MHz,  $\text{CDCl}_3$ ) of compound **5da**:

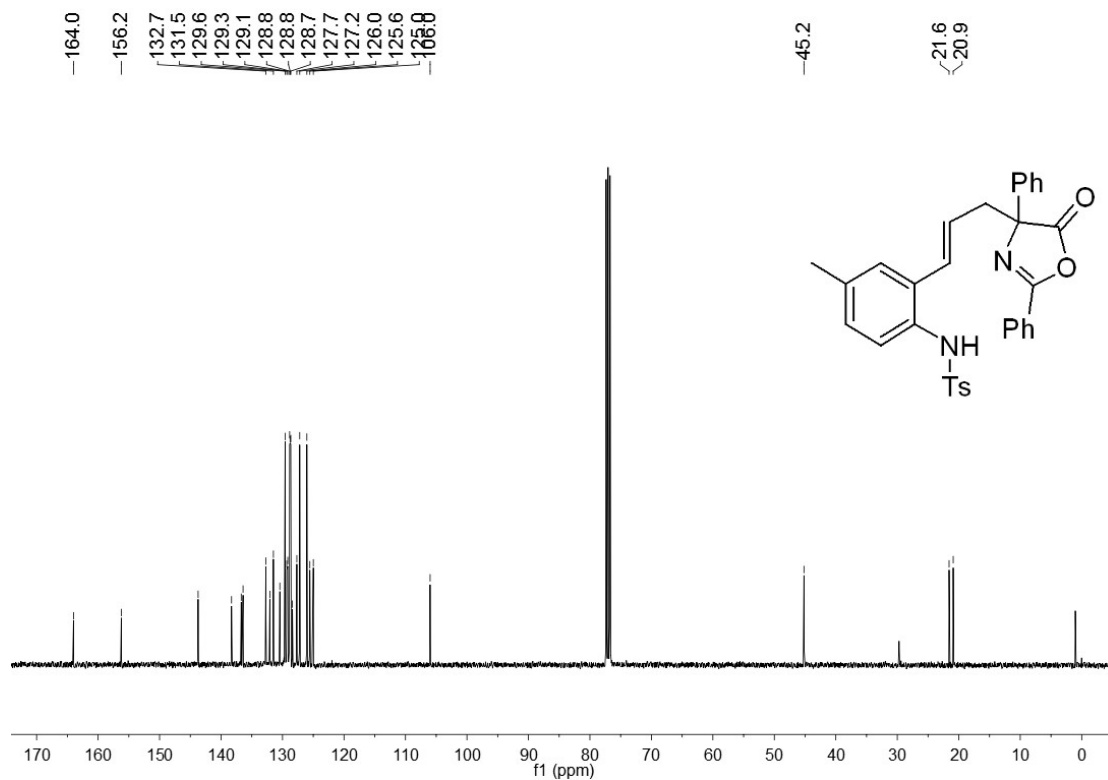

$^1\text{H}$  NMR (400 MHz,  $\text{CDCl}_3$ ) of compound **5ea**: inseparable *E/Z*-isomers (*E/Z*= 93:7)

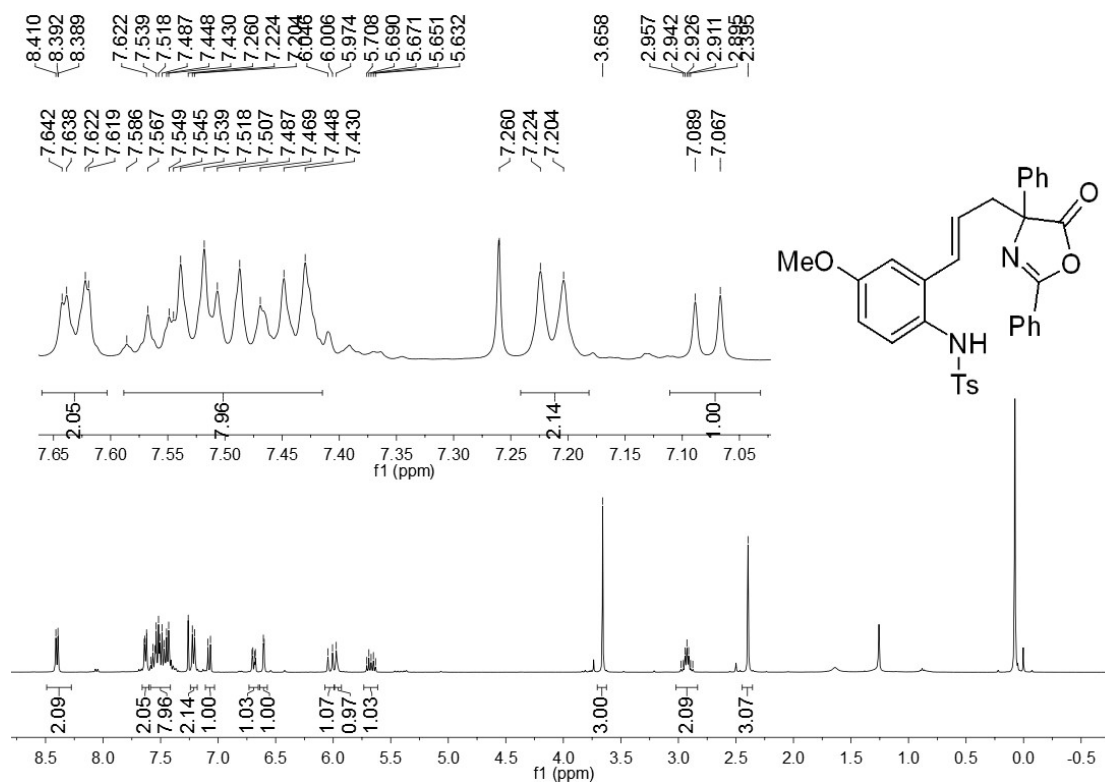

$^{13}\text{C}$  NMR (100 MHz,  $\text{CDCl}_3$ ) of compound **5ea**: inseparable *E/Z*-isomers (*E/Z*= 93:7)

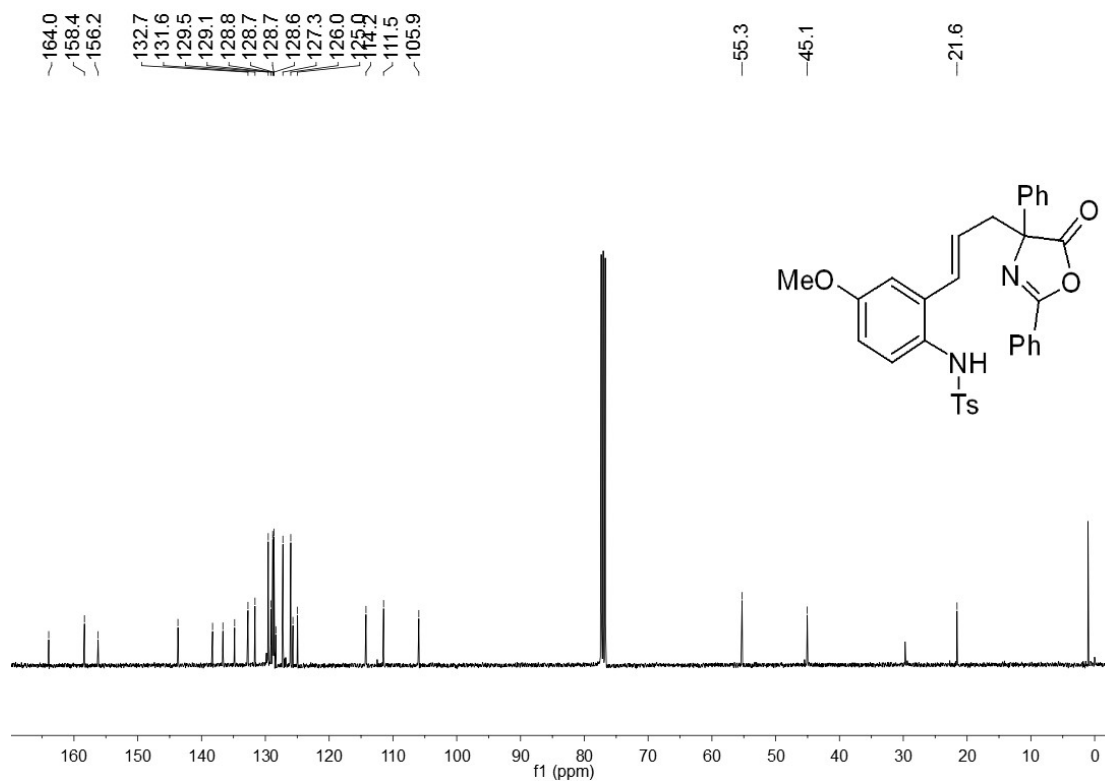

$^1\text{H}$  NMR (400 MHz,  $\text{CDCl}_3$ ) of compound **5fa**: inseparable *E/Z*-isomers (*E/Z* = 89:11)

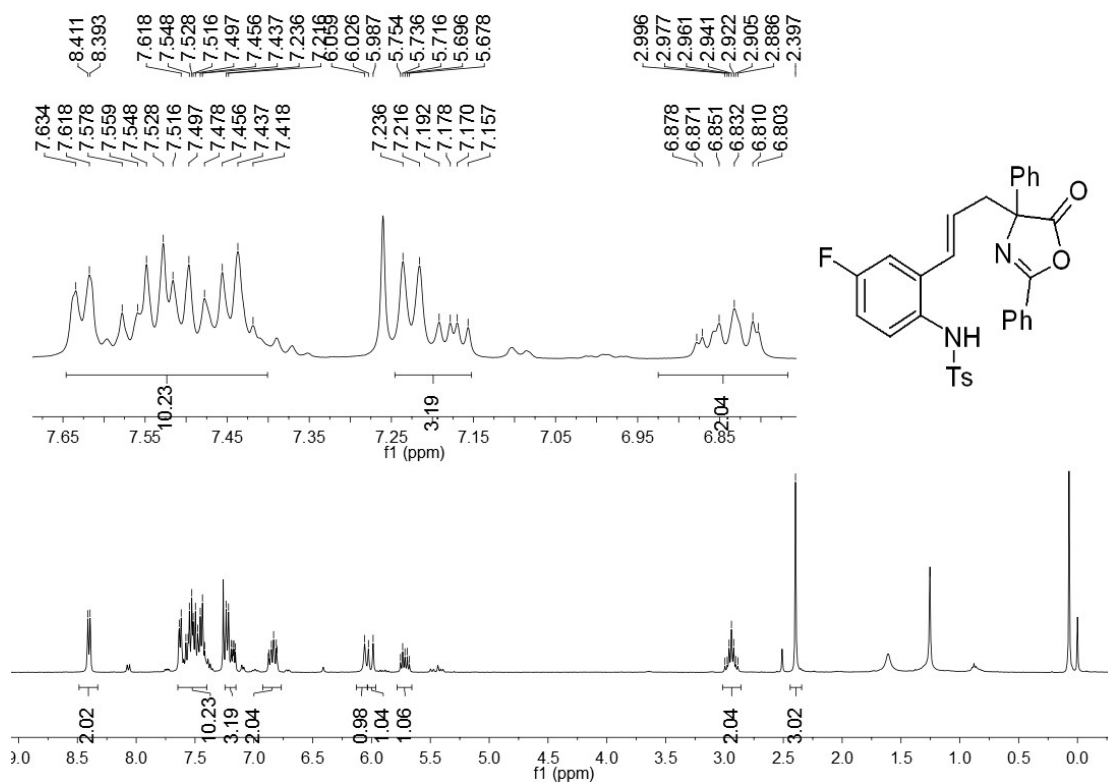

$^{13}\text{C}$  NMR (100 MHz,  $\text{CDCl}_3$ ) of compound **5fa**: inseparable *E/Z*-isomers (*E/Z* = 89:11)

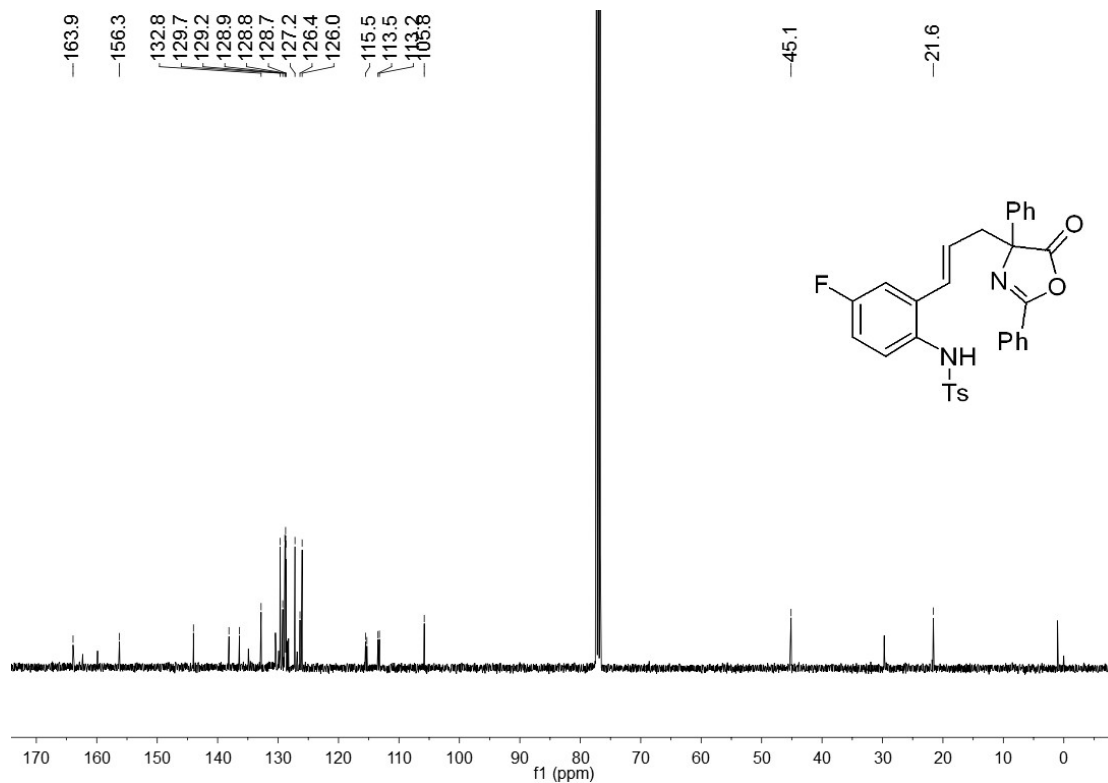

$^1\text{H}$  NMR (400 MHz,  $\text{CDCl}_3$ ) of compound **5ga**: inseparable *E/Z*-isomers (*E/Z*=87:13)

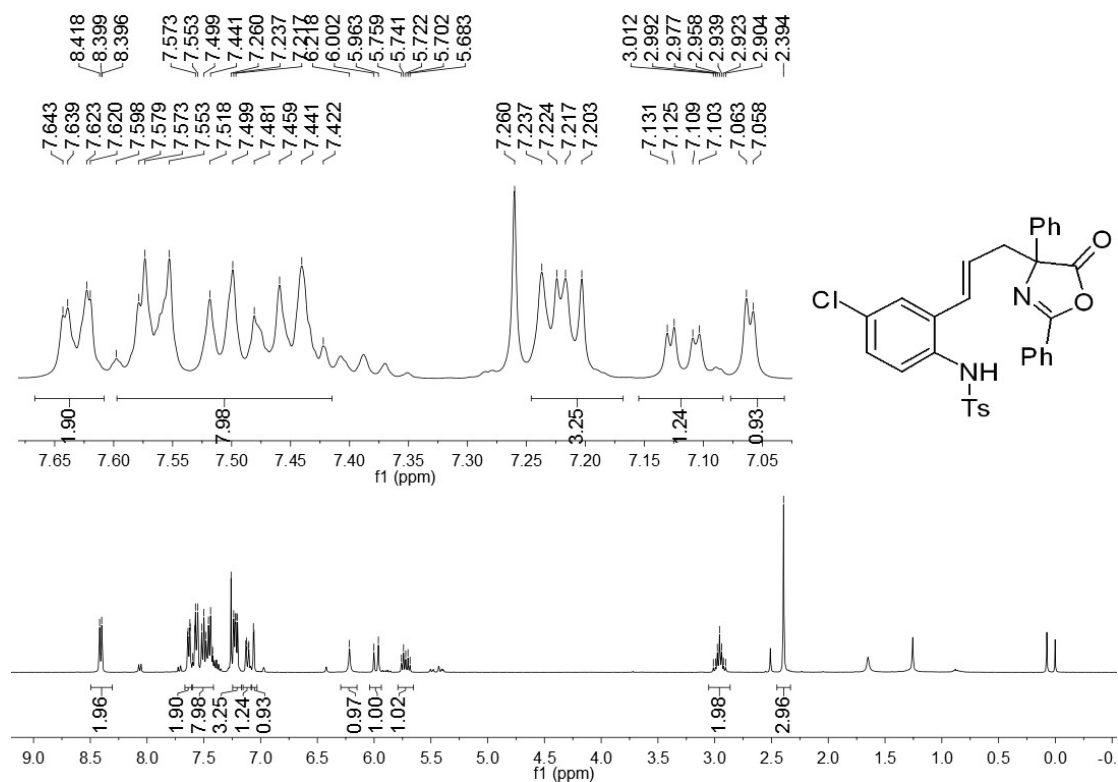

$^{13}\text{C}$  NMR (100 MHz,  $\text{CDCl}_3$ ) of compound **5ga**: inseparable *E/Z*-isomers (*E/Z*=87:13)

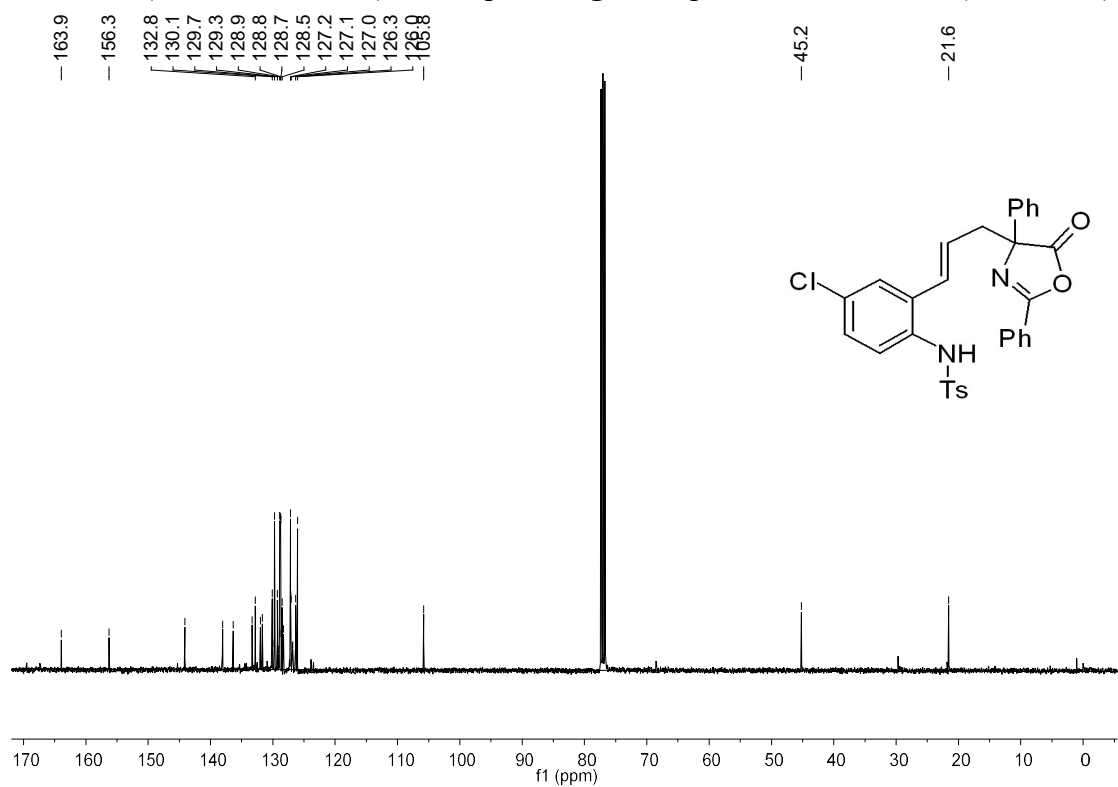

$^1\text{H}$  NMR (400 MHz,  $\text{CDCl}_3$ ) of compound **5ha**: inseparable *E/Z*-isomers (*E/Z*=83:17)

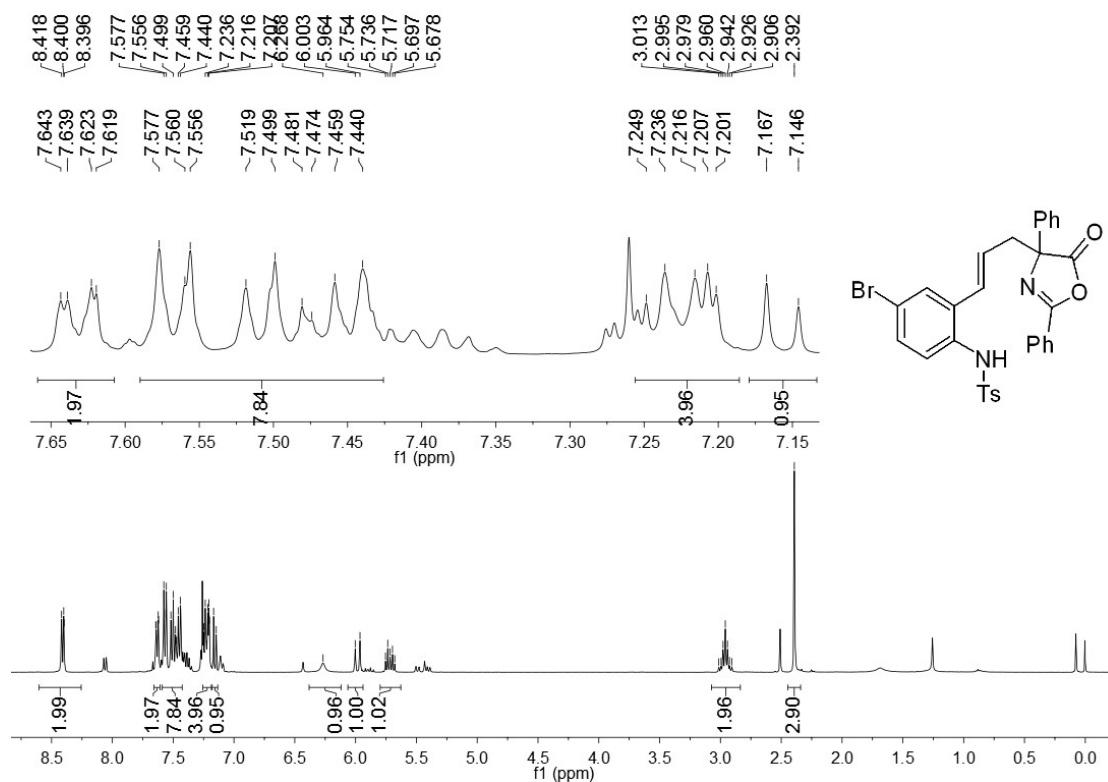

$^{13}\text{C}$  NMR (100 MHz,  $\text{CDCl}_3$ ) of compound **5ha**: inseparable *E/Z*-isomers (*E/Z*=83:17)

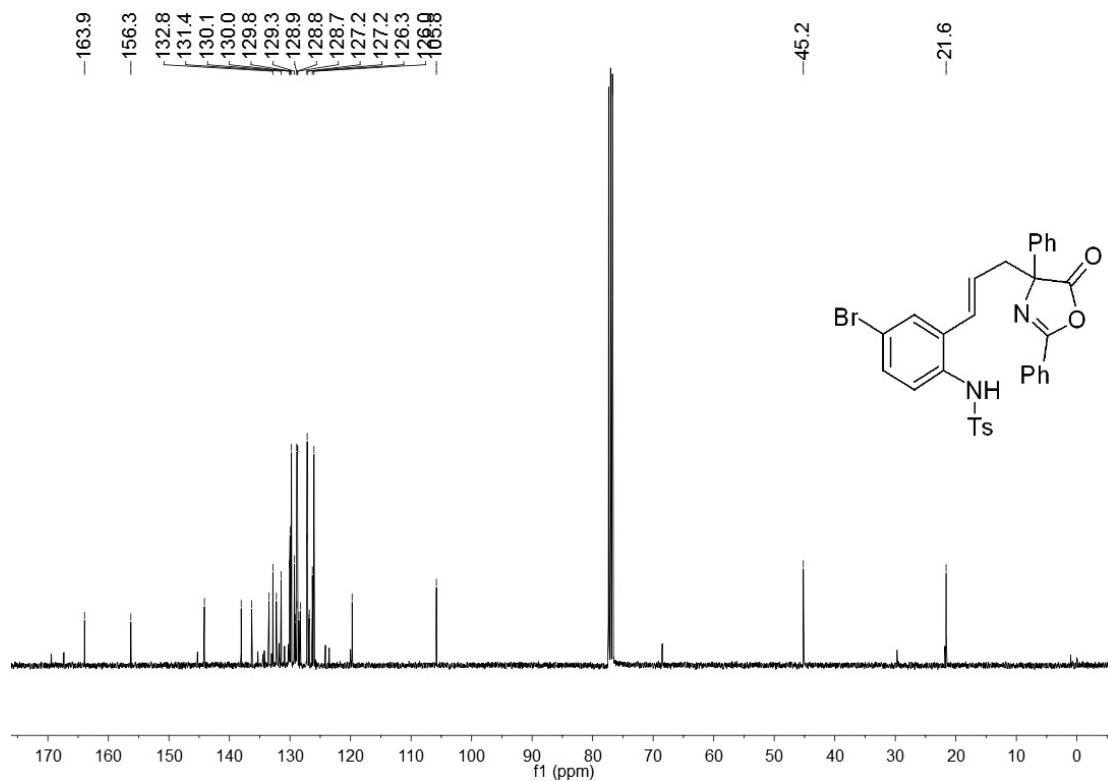

$^1\text{H}$  NMR (400 MHz,  $\text{CDCl}_3$ ) of compound **5ia**:

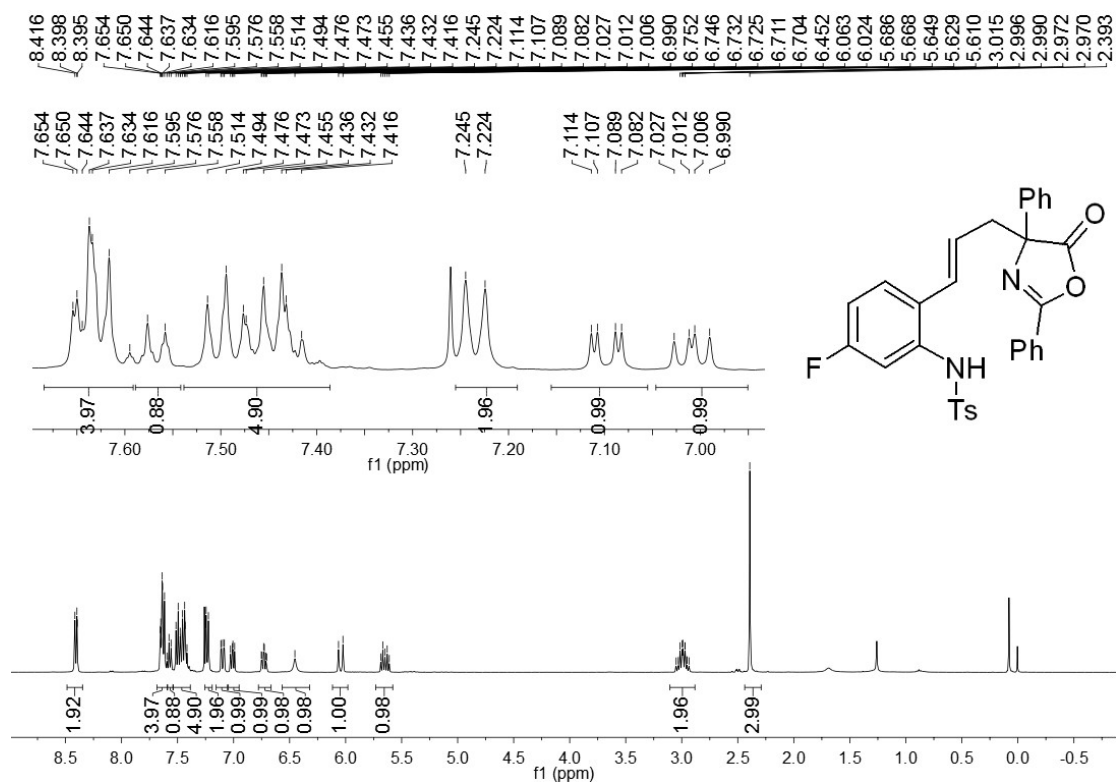

$^{13}\text{C}$  NMR (100 MHz,  $\text{CDCl}_3$ ) of compound **5ia**:

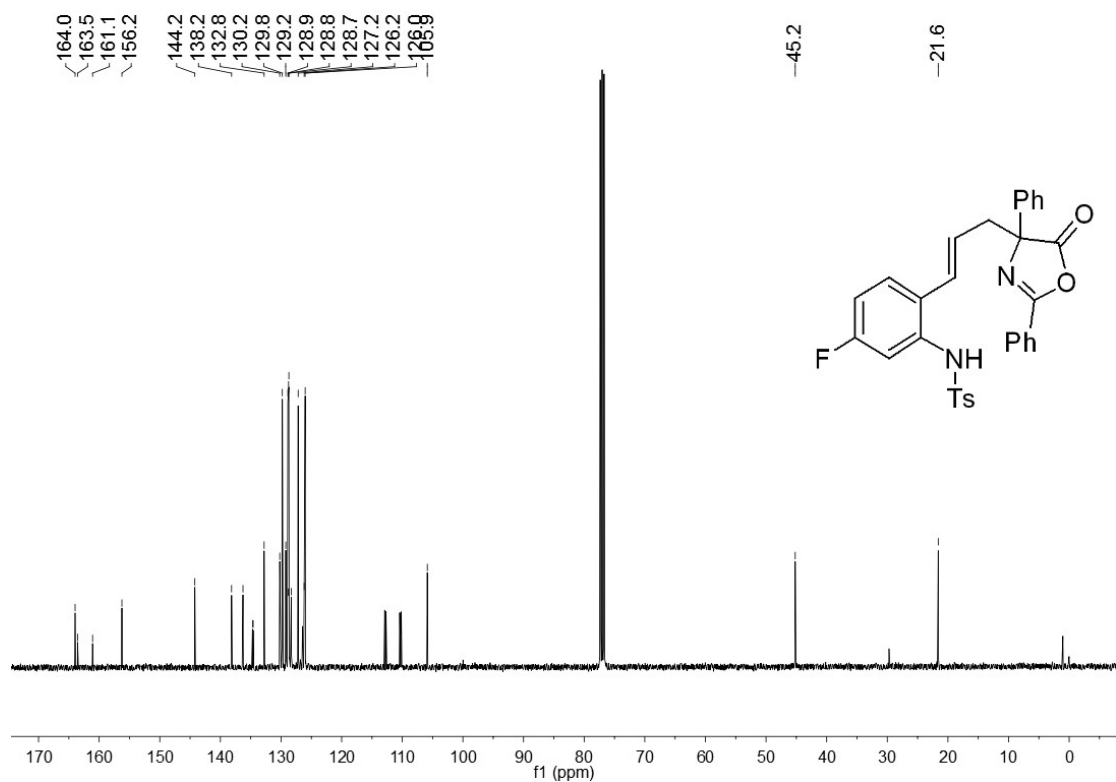

$^1\text{H}$  NMR (400 MHz,  $\text{CDCl}_3$ ) of **chiral 3aa**: inseparable diastereomers (dr = 84:16)

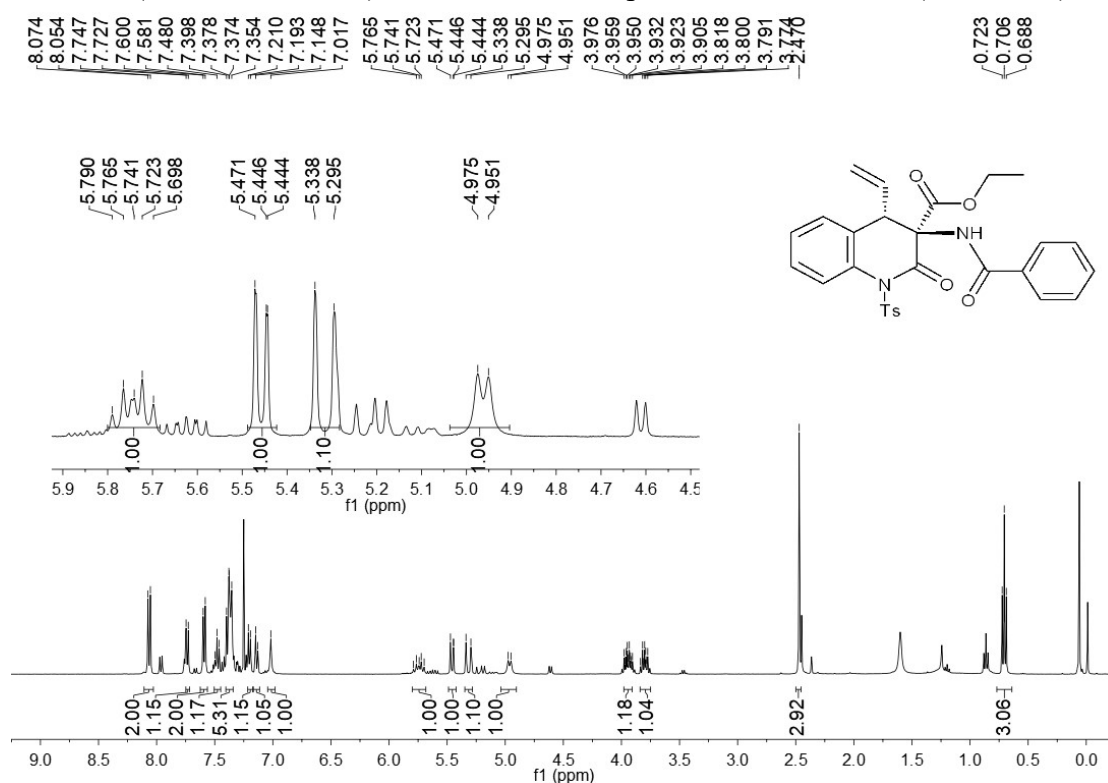

$^{13}\text{C}$  NMR (100 MHz,  $\text{CDCl}_3$ ) of **chiral 3aa**: inseparable diastereomers (dr = 84:16)

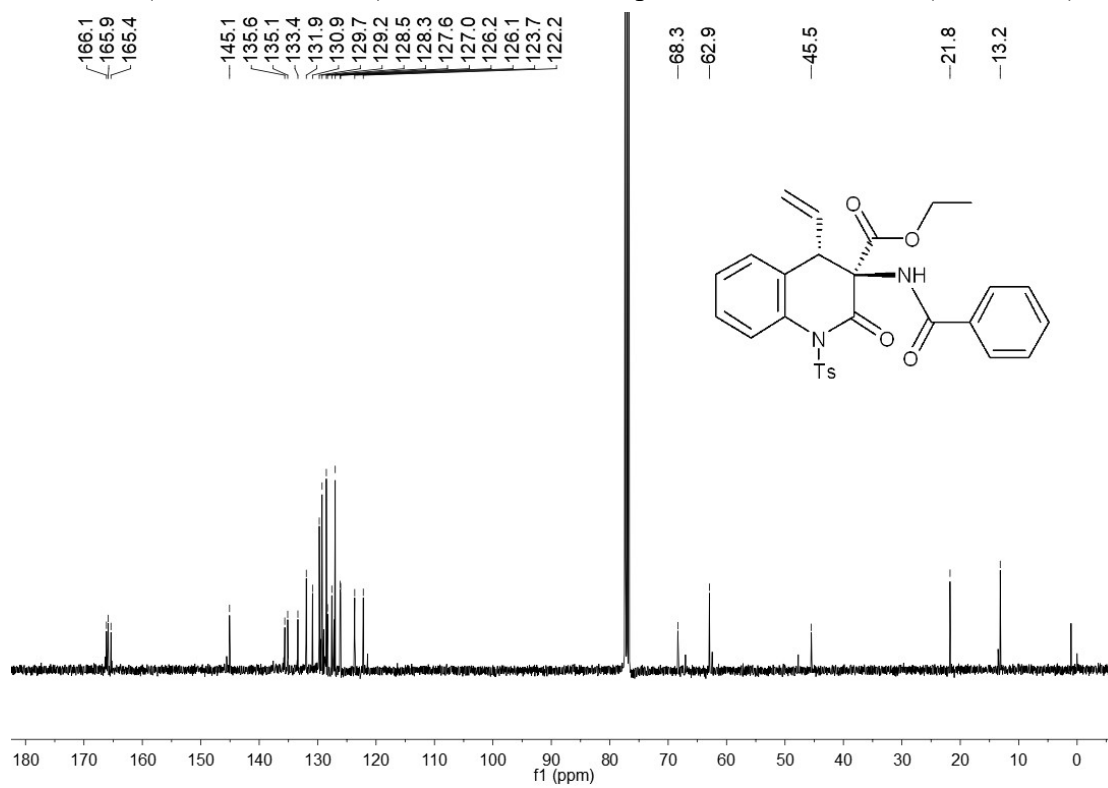

$^1\text{H}$  NMR (400 MHz,  $\text{CDCl}_3$ ) of **chiral 3ea**: inseparable diastereomers (dr = 83:17)

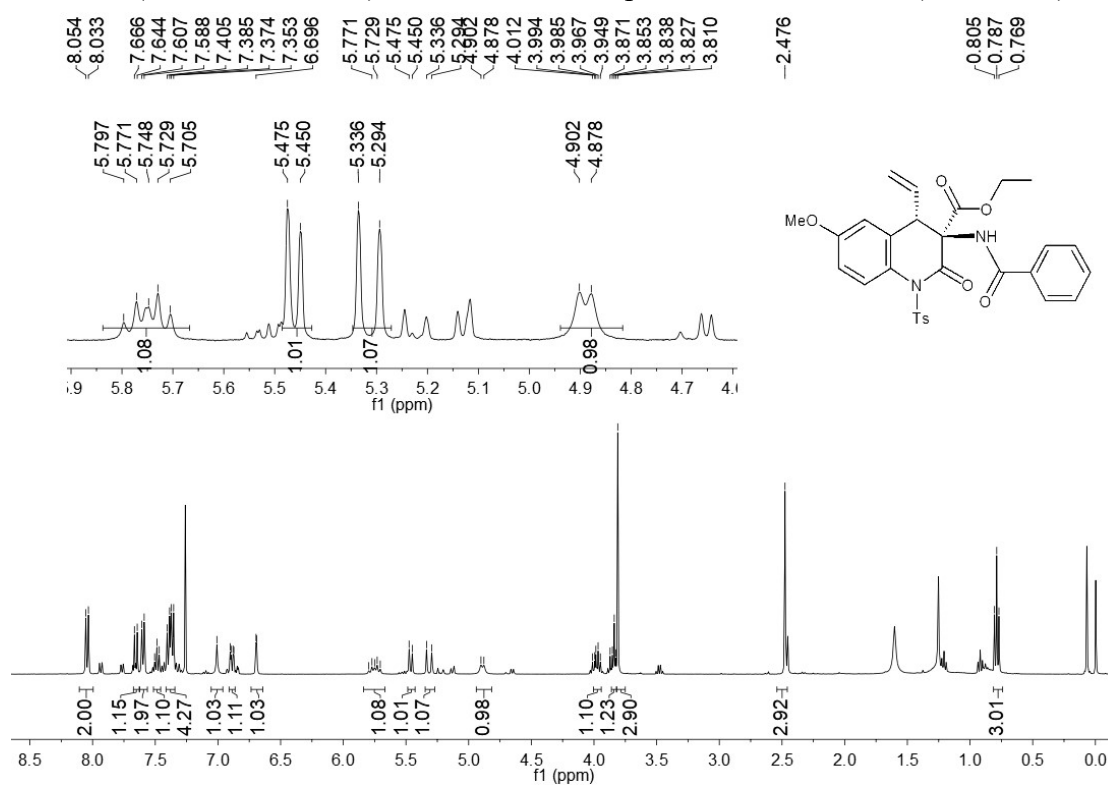

$^{13}\text{C}$  NMR (100 MHz,  $\text{CDCl}_3$ ) of **chiral 3ea**: inseparable diastereomers (dr = 83:17)

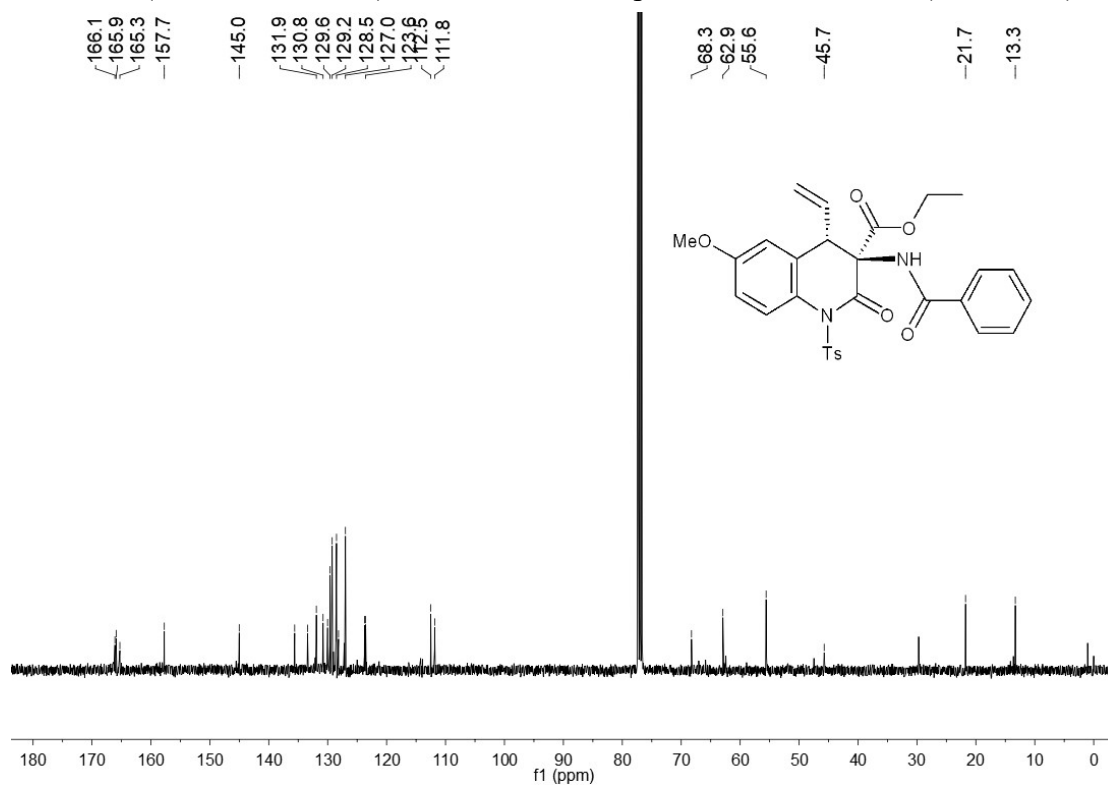



$^1\text{H}$  NMR (400 MHz,  $\text{CDCl}_3$ ) of **chiral 3ga**: inseparable diastereomers (dr = 83:17)

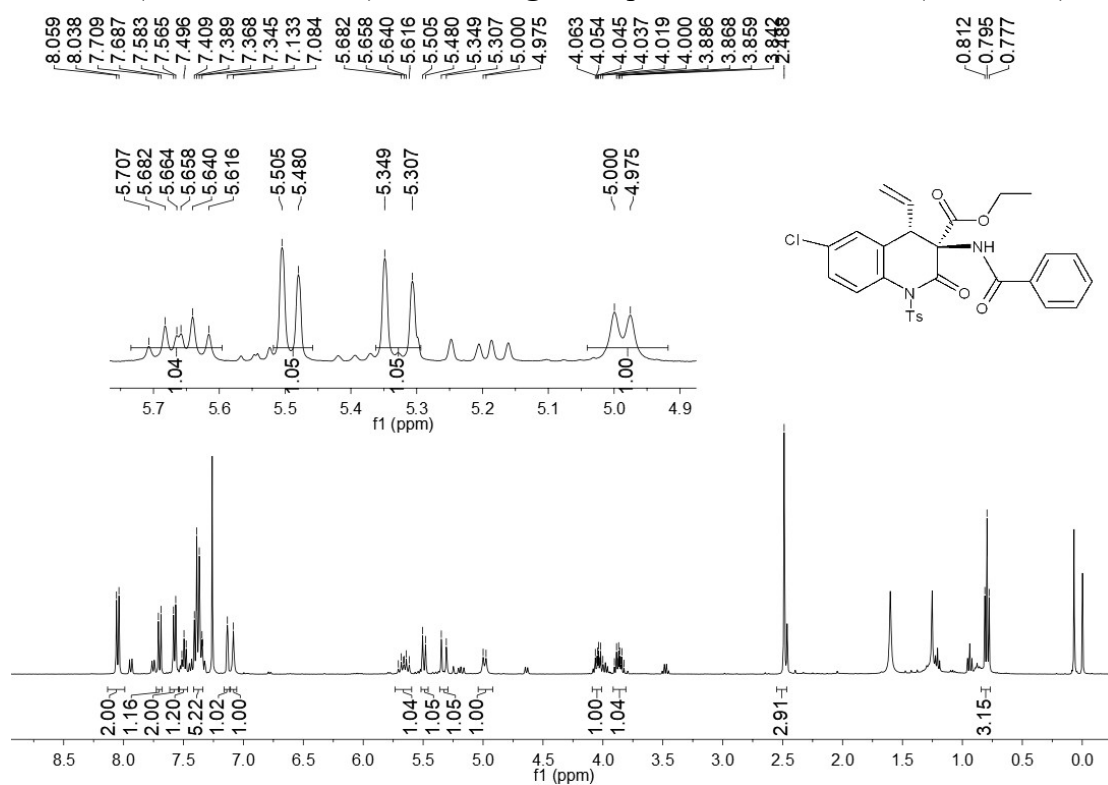

$^{13}\text{C}$  NMR (100 MHz,  $\text{CDCl}_3$ ) of **chiral 3ea**: inseparable diastereomers (dr = 83:17)

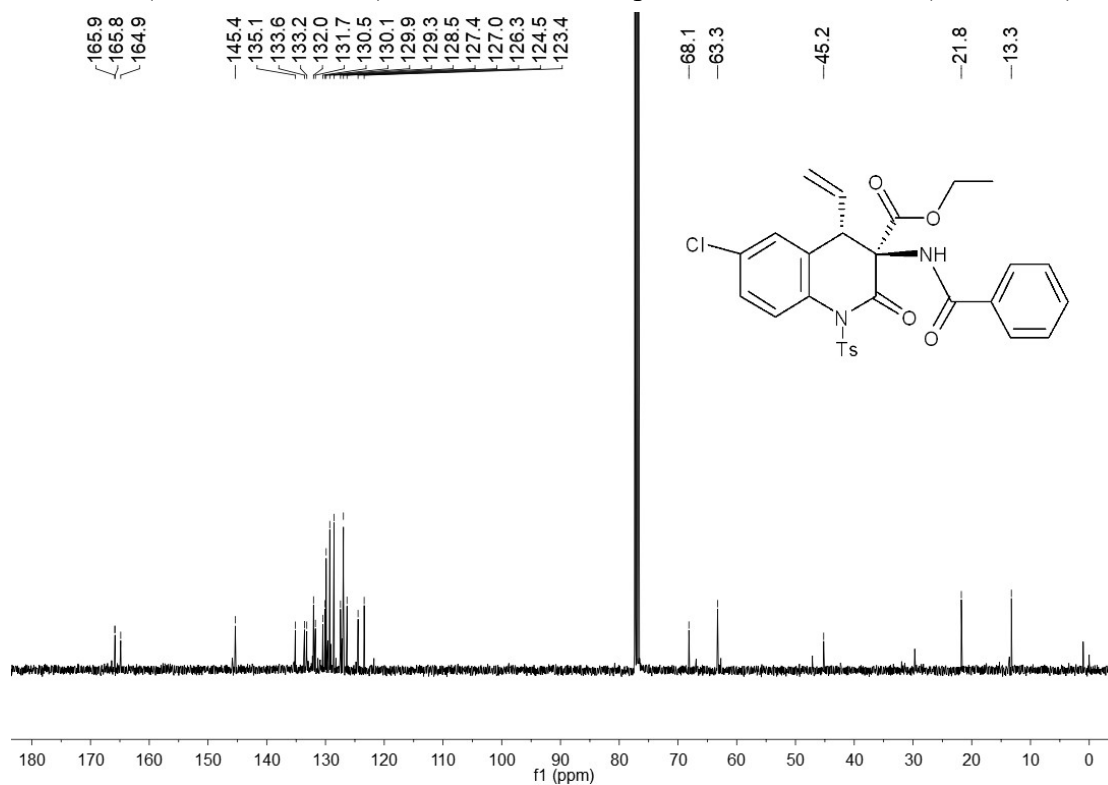

$^1\text{H}$  NMR (400 MHz,  $\text{CDCl}_3$ ) of **chiral 3ia**: inseparable diastereomers (dr = 74:26)

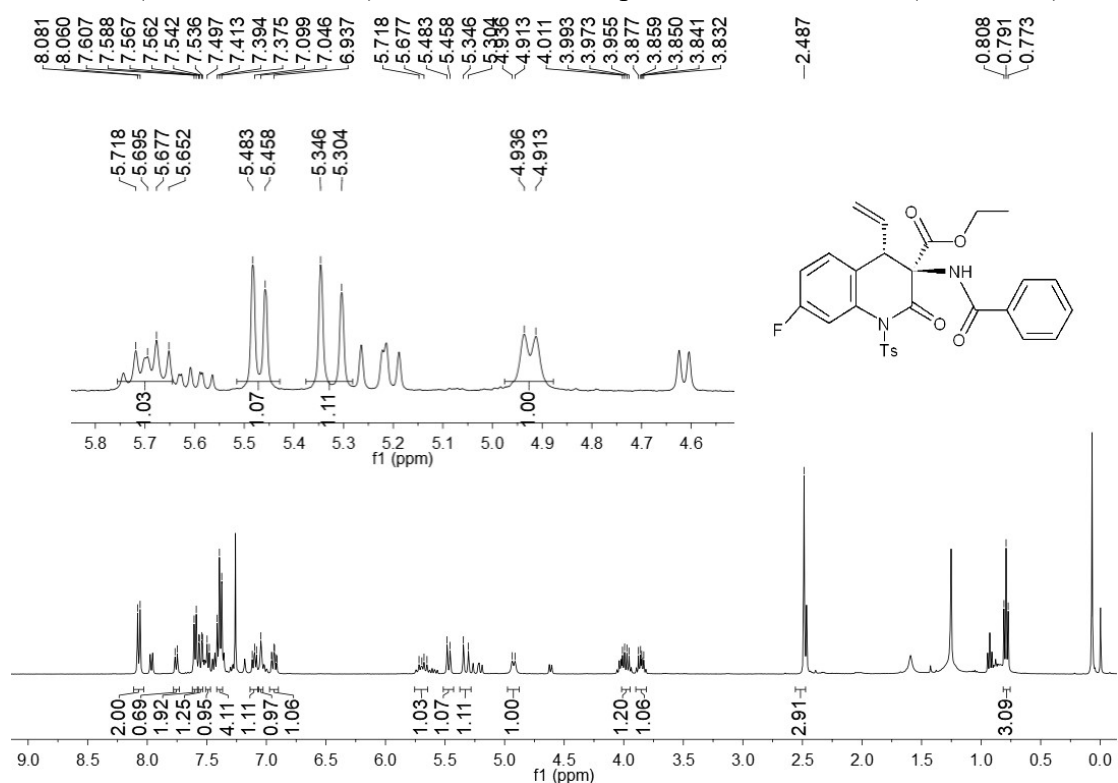

$^{13}\text{C}$  NMR (100 MHz,  $\text{CDCl}_3$ ) of **chiral 3ia**: inseparable diastereomers (dr = 74:26)

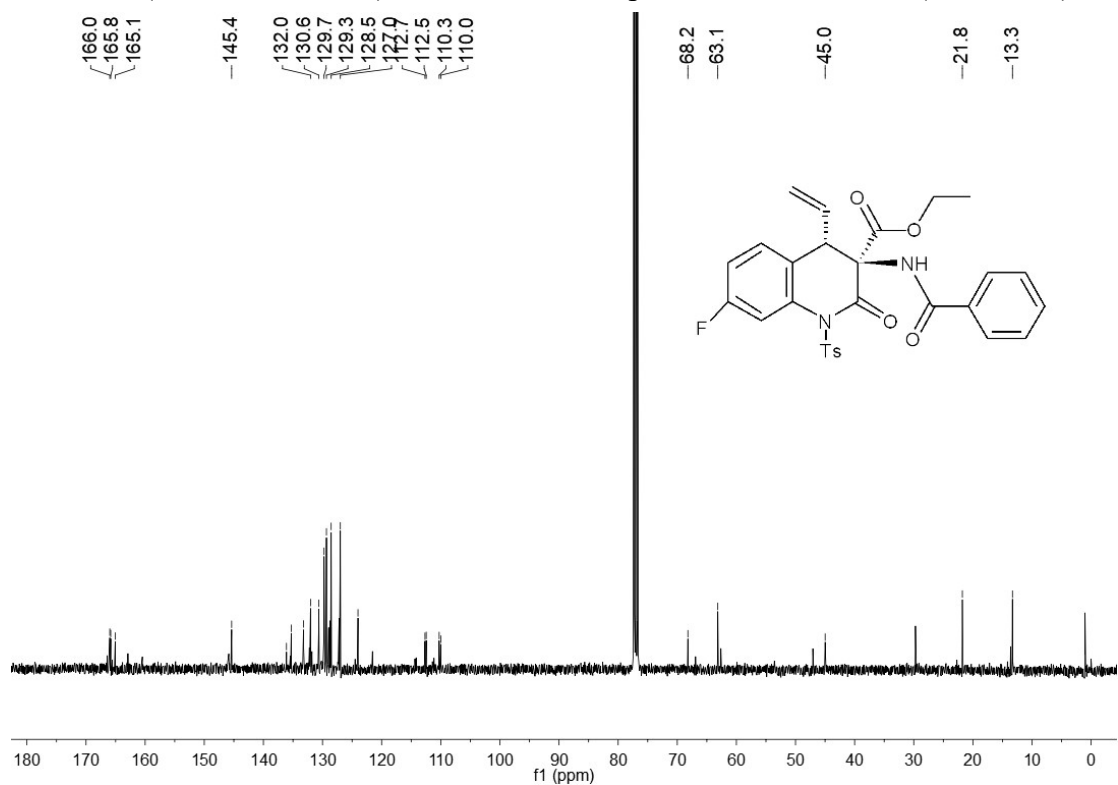

## 9. HPLC spectra of chiral 3

chiral 3aa:

Racemic:

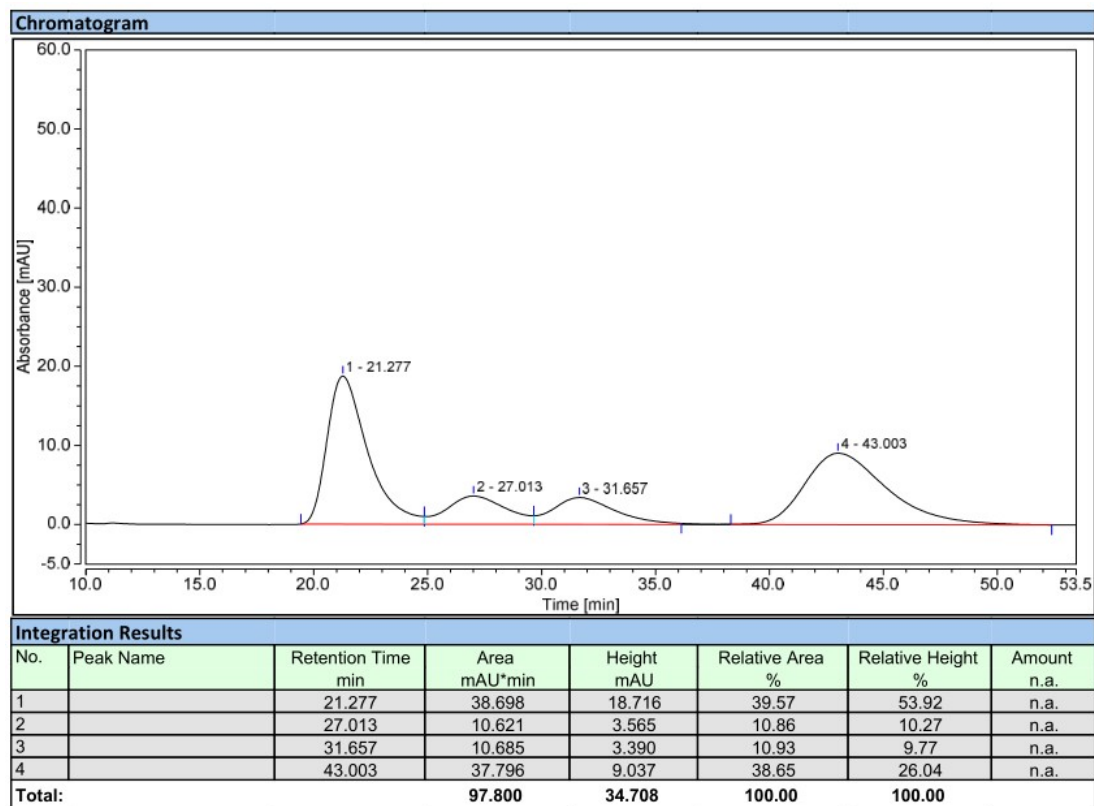

Enantioselective:

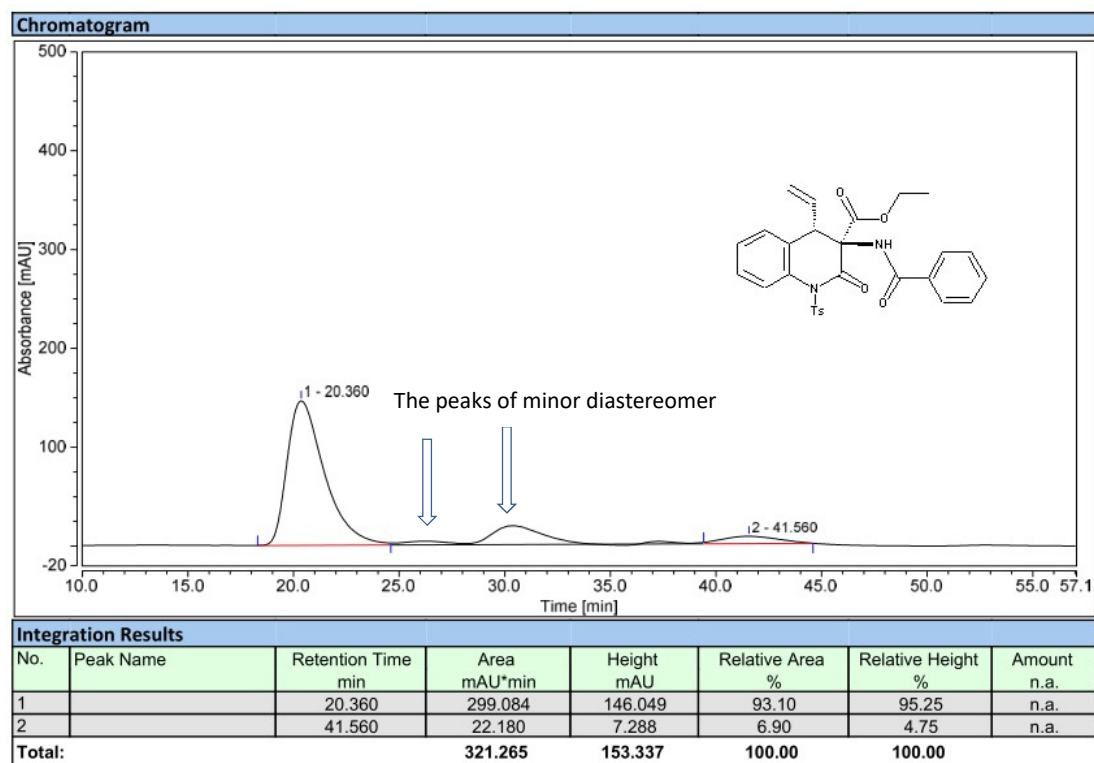

chiral 3ea:

Racemic:

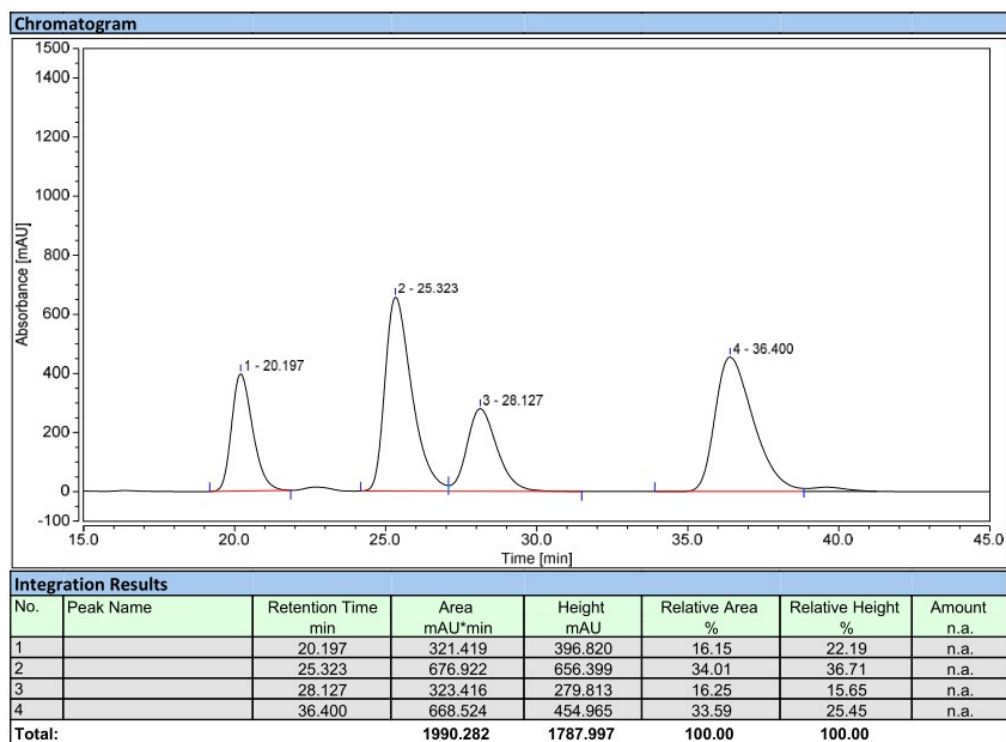

Enantioselective:

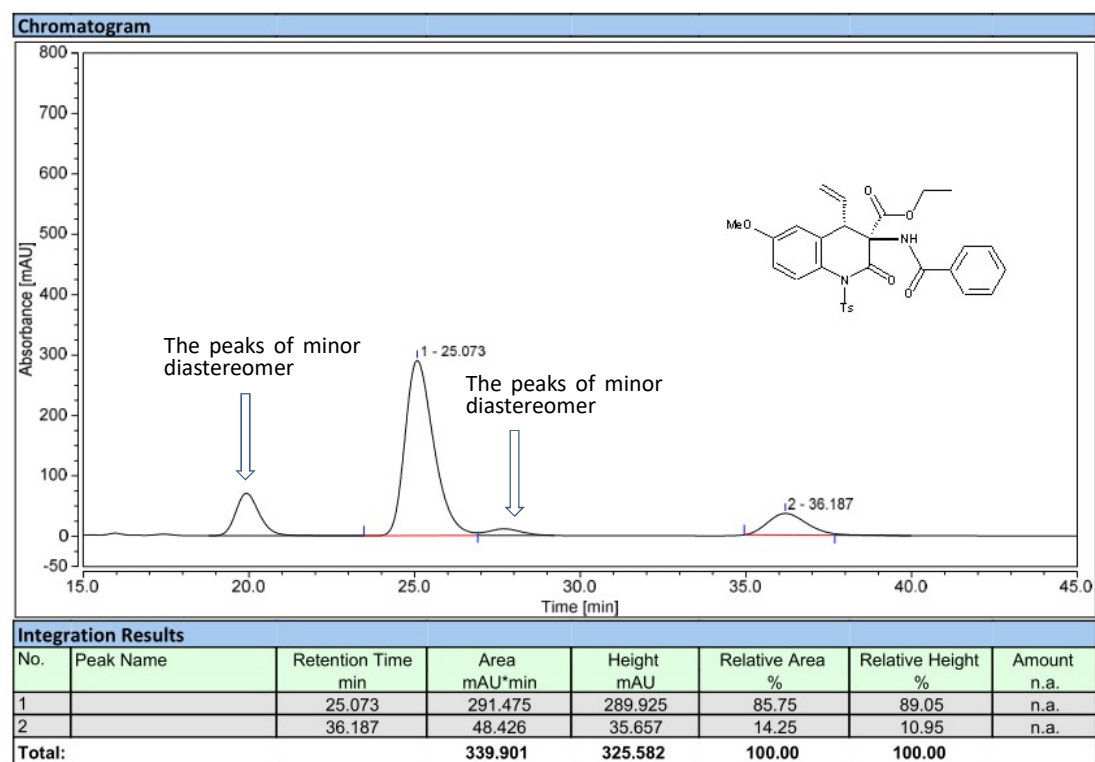

### chiral 3ga:

Racemic:

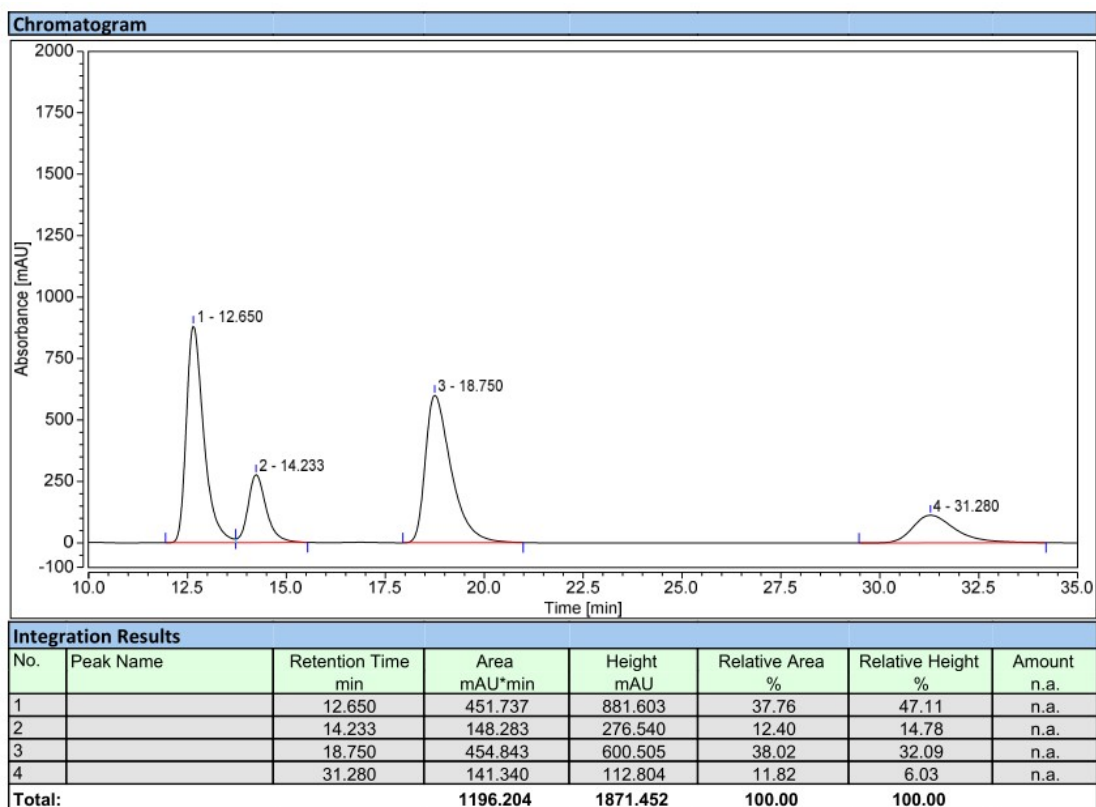

Enantioselective:

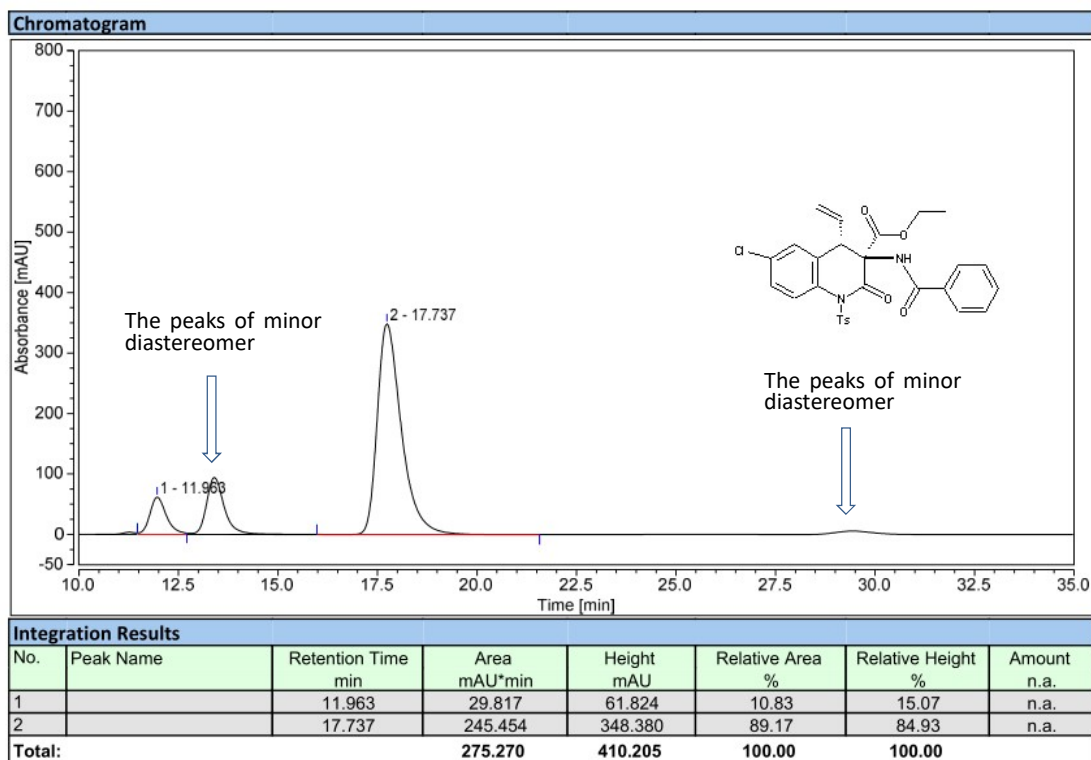

chiral 3ia:

Racemic:

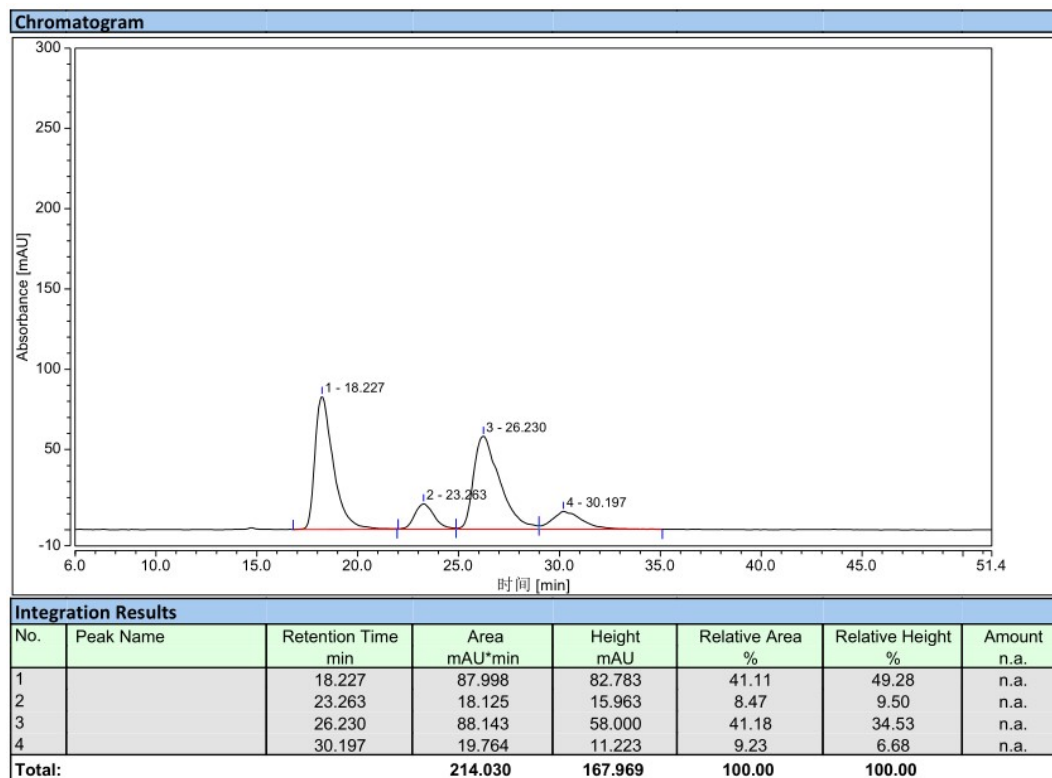

Enantioselective:

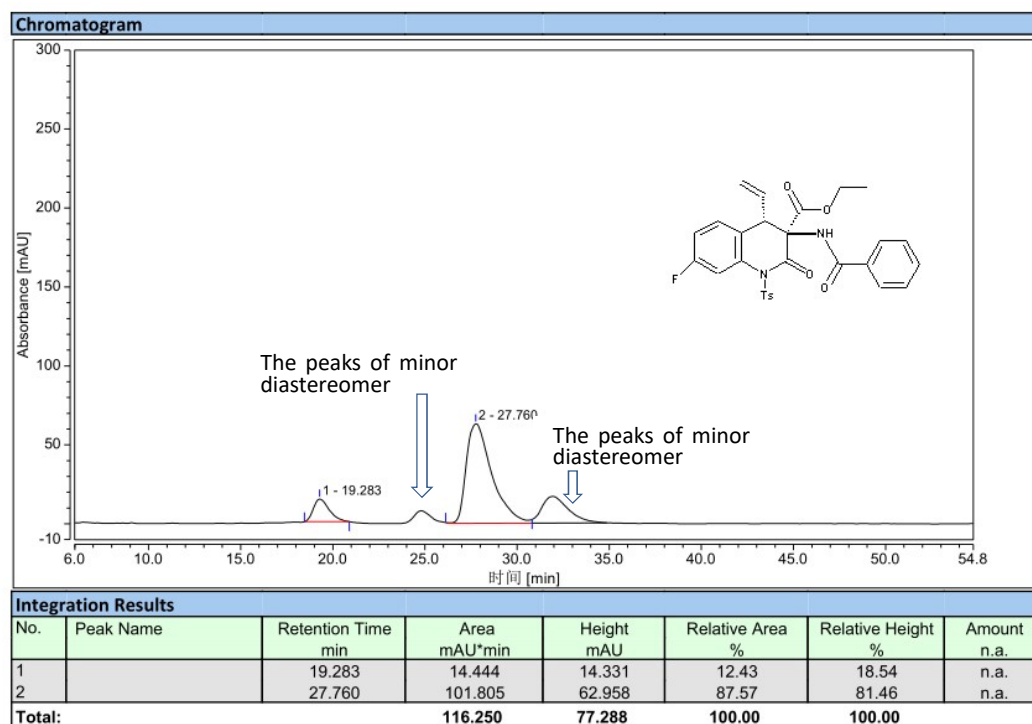

## 10. X-ray single crystal data for compounds 3aa and chiral 3aa

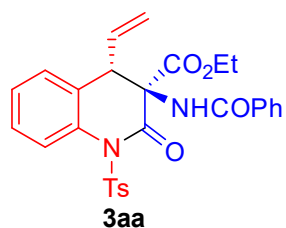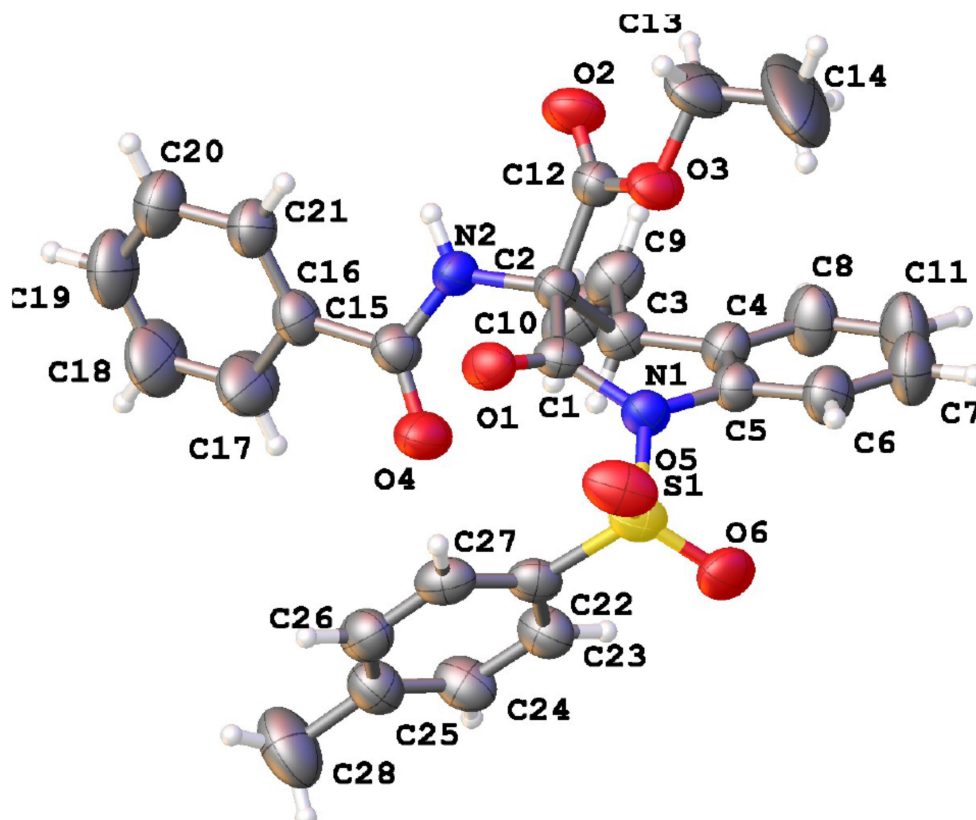

The thermal ellipsoid was drawn at the 30% probability level.

|                        |                                                                 |                 |
|------------------------|-----------------------------------------------------------------|-----------------|
| Empirical formula      | C <sub>28</sub> H <sub>26</sub> N <sub>2</sub> O <sub>6</sub> S |                 |
| Formula weight         | 518.57                                                          |                 |
| Temperature            | 296.15 K                                                        |                 |
| Wavelength             | 0.71073 Å                                                       |                 |
| Crystal system         | Monoclinic                                                      |                 |
| Space group            | P 1 2 <sub>1</sub> /n 1                                         |                 |
| Unit cell dimensions   | a = 9.4926(15) Å                                                | α = 90°.        |
|                        | b = 12.1584(19) Å                                               | β = 94.409(2)°. |
|                        | c = 22.925(4) Å                                                 | γ = 90°.        |
| Volume                 | 2638.1(7) Å <sup>3</sup>                                        |                 |
| Z                      | 4                                                               |                 |
| Density (calculated)   | 1.306 Mg/m <sup>3</sup>                                         |                 |
| Absorption coefficient | 0.167 mm <sup>-1</sup>                                          |                 |

|                                   |                                             |
|-----------------------------------|---------------------------------------------|
| F(000)                            | 1088                                        |
| Crystal size                      | 0.35 x 0.25 x 0.2 mm <sup>3</sup>           |
| Theta range for data collection   | 2.392 to 27.000°.                           |
| Index ranges                      | -12<=h<=12, -15<=k<=15, -26<=l<=29          |
| Reflections collected             | 17967                                       |
| Independent reflections           | 5729 [R(int) = 0.0790]                      |
| Completeness to theta = 25.242°   | 99.7 %                                      |
| Absorption correction             | Semi-empirical from equivalents             |
| Max. and min. transmission        | 0.7532 and 0.5578                           |
| Refinement method                 | Full-matrix least-squares on F <sup>2</sup> |
| Data / restraints / parameters    | 5729 / 0 / 336                              |
| Goodness-of-fit on F <sup>2</sup> | 1.027                                       |
| Final R indices [I>2sigma(I)]     | R1 = 0.0555, wR2 = 0.1512                   |
| R indices (all data)              | R1 = 0.0717, wR2 = 0.1626                   |
| Extinction coefficient            | n/a                                         |
| Largest diff. peak and hole       | 0.574 and -0.456 e.Å <sup>-3</sup>          |



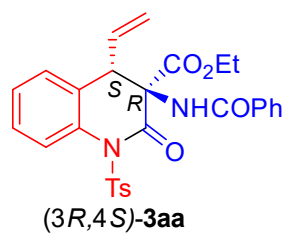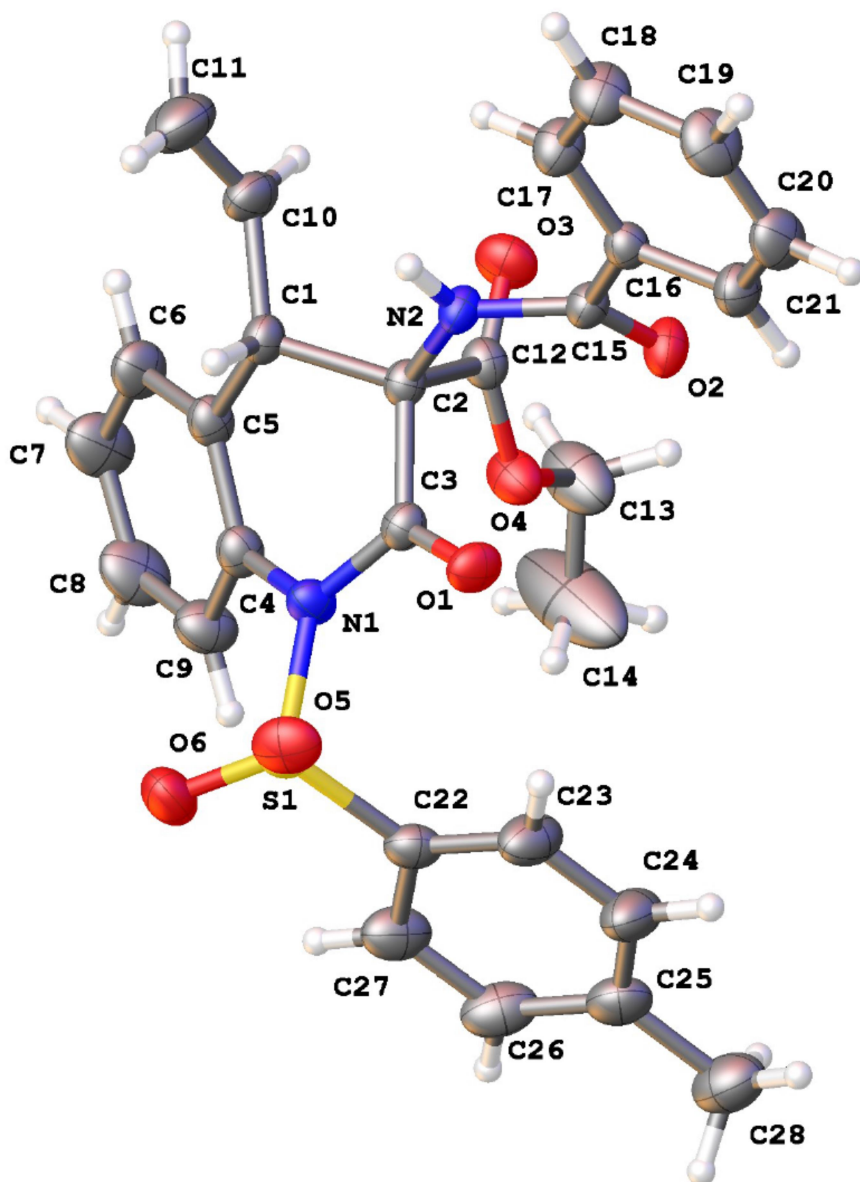

The thermal ellipsoid was drawn at the 30% probability level.

|                   |                                                                 |
|-------------------|-----------------------------------------------------------------|
| Empirical formula | C <sub>31</sub> H <sub>34</sub> N <sub>2</sub> O <sub>7</sub> S |
| Formula weight    | 578.66                                                          |
| Temperature       | 296.15 K                                                        |
| Wavelength        | 0.71073 Å                                                       |
| Crystal system    | Orthorhombic                                                    |

|                                   |                                               |          |
|-----------------------------------|-----------------------------------------------|----------|
| Space group                       | P2 <sub>1</sub> 2 <sub>1</sub> 2 <sub>1</sub> |          |
| Unit cell dimensions              | a = 7.8782(19) Å                              | α = 90°. |
|                                   | b = 10.747(3) Å                               | β = 90°. |
|                                   | c = 35.997(8) Å                               | γ = 90°. |
| Volume                            | 3047.8(12) Å <sup>3</sup>                     |          |
| Z                                 | 4                                             |          |
| Density (calculated)              | 1.261 Mg/m <sup>3</sup>                       |          |
| Absorption coefficient            | 0.154 mm <sup>-1</sup>                        |          |
| F(000)                            | 1224                                          |          |
| Crystal size                      | 0.3 x 0.2 x 0.15 mm <sup>3</sup>              |          |
| Theta range for data collection   | 2.544 to 28.484°.                             |          |
| Index ranges                      | -10 ≤ h ≤ 10, -14 ≤ k ≤ 14, -47 ≤ l ≤ 29      |          |
| Reflections collected             | 22026                                         |          |
| Independent reflections           | 7198 [R(int) = 0.0953]                        |          |
| Completeness to theta = 25.242°   | 99.8 %                                        |          |
| Absorption correction             | None                                          |          |
| Refinement method                 | Full-matrix least-squares on F <sup>2</sup>   |          |
| Data / restraints / parameters    | 7198 / 0 / 375                                |          |
| Goodness-of-fit on F <sup>2</sup> | 1.081                                         |          |
| Final R indices [I > 2σ(I)]       | R1 = 0.0565, wR2 = 0.1332                     |          |
| R indices (all data)              | R1 = 0.0780, wR2 = 0.1412                     |          |
| Absolute structure parameter      | 0.09(4)                                       |          |
| Extinction coefficient            | n/a                                           |          |
| Largest diff. peak and hole       | 0.360 and -0.288 e.Å <sup>-3</sup>            |          |
